# Supplementary material for: (IPr)CuF-catalyzed α-site regiocontrolled trans-hydrofluorination of ynamides
Source: Royal Society of Chemistry journal article supplement (doi:10.1039/c6ob01345g), 2016-01-01
Supplement: c6ob01345g1.pdf [file c6ob01345g1.pdf]

## **(IPr)CuF-Catalyzed $\alpha$ -Site Regiocontrolled *trans*-Hydrofluorination of Ynamides**

Guohao Zhu, Shineng Qiu, Yang Xi, Yao Ding, Dongming Zhang, Rong Zhang,  
Guangke He\* and Hongjun Zhu\*

*Department of Applied Chemistry, College of Chemistry and Molecular Engineering, Nanjing  
Tech University, Nanjing 211816, People's Republic of China*

\*E-mails: [hegk@njtech.edu.cn](mailto:hegk@njtech.edu.cn); [zhuhj@njtech.edu.cn](mailto:zhuhj@njtech.edu.cn).

### **Spectra of compounds Z-2a-4o**

|                          |                |                          |                |
|--------------------------|----------------|--------------------------|----------------|
| Spectra of compound Z-2a | <b>p 2-4</b>   | Spectra of compound Z-2k | <b>p 33-35</b> |
| Spectra of compound Z-3a | <b>p 5</b>     | Spectra of compound Z-3k | <b>p 36</b>    |
| Spectra of compound Z-2b | <b>p 6-8</b>   | Spectra of compound Z-2l | <b>p 37-39</b> |
| Spectra of compound Z-2c | <b>p 9-11</b>  | Spectra of compound Z-3l | <b>p 40</b>    |
| Spectra of compound Z-2d | <b>p 12-14</b> | Spectra of compound Z-2m | <b>p 41-43</b> |
| Spectra of compound Z-2e | <b>p 15-17</b> | Spectra of compound Z-2n | <b>p 44-46</b> |
| Spectra of compound Z-2f | <b>p 18-20</b> | Spectra of compound Z-2o | <b>p 47-49</b> |
| Spectra of compound Z-2g | <b>p 21-23</b> | Spectra of compound Z-2p | <b>p 50-52</b> |
| Spectra of compound Z-2h | <b>p 24-26</b> | Spectra of compound 4a   | <b>p 53-55</b> |
| Spectra of compound Z-2i | <b>p 27-29</b> | Spectra of compound 4o   | <b>p 56-58</b> |
| Spectra of compound Z-2j | <b>p 30-32</b> | Detailed discussions     | <b>p 59-60</b> |

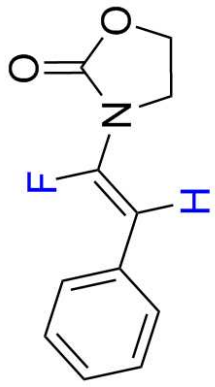

Z-2a

zgh-2-176-H

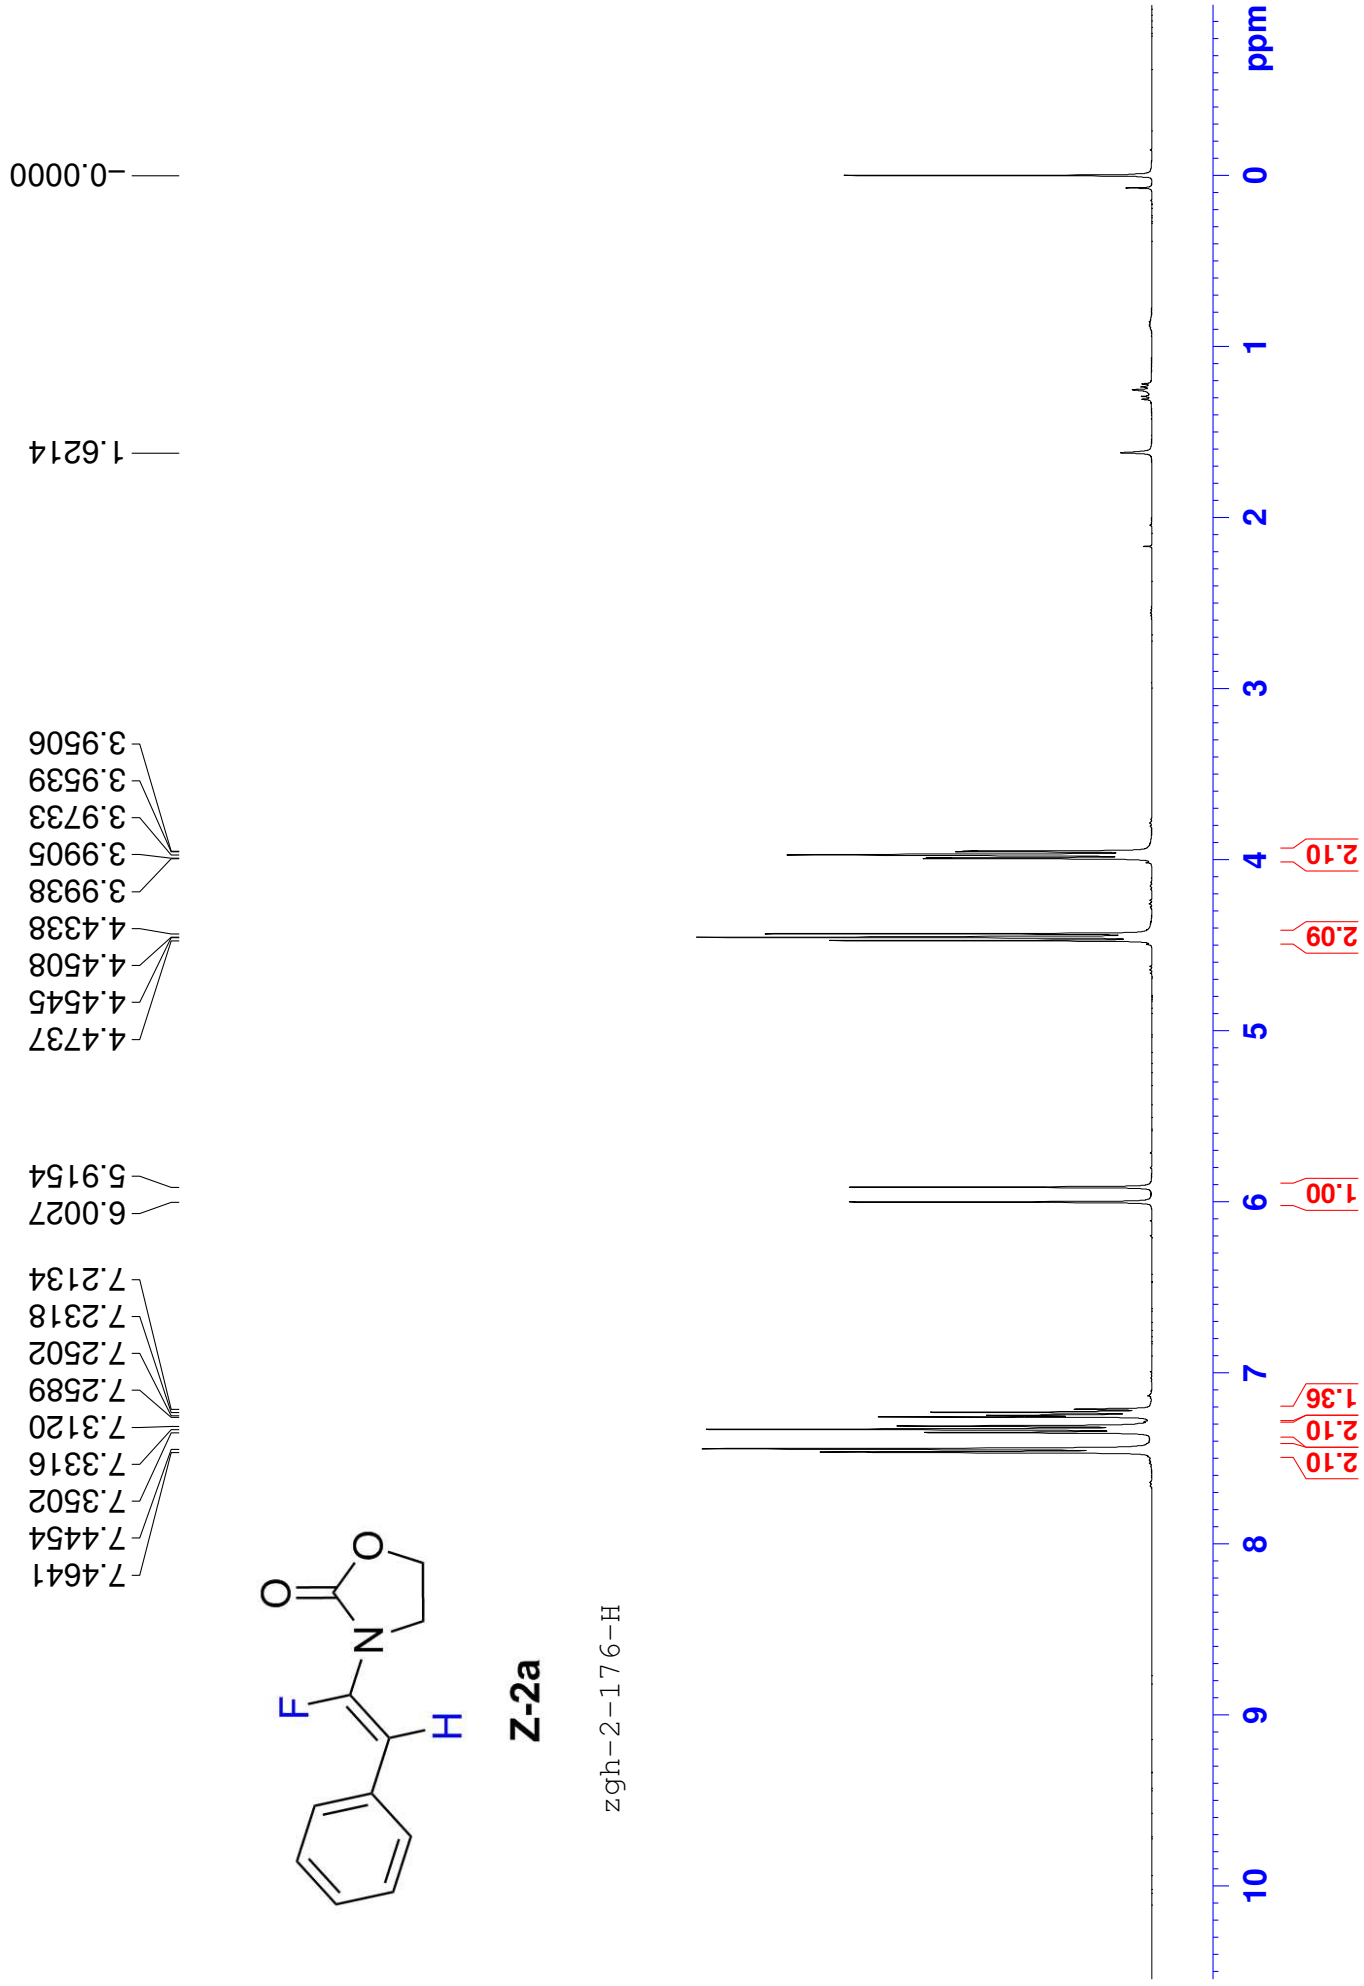

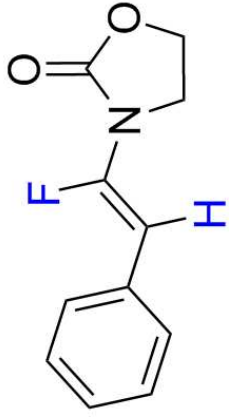

**Z-2a**

zgh-2-176-C

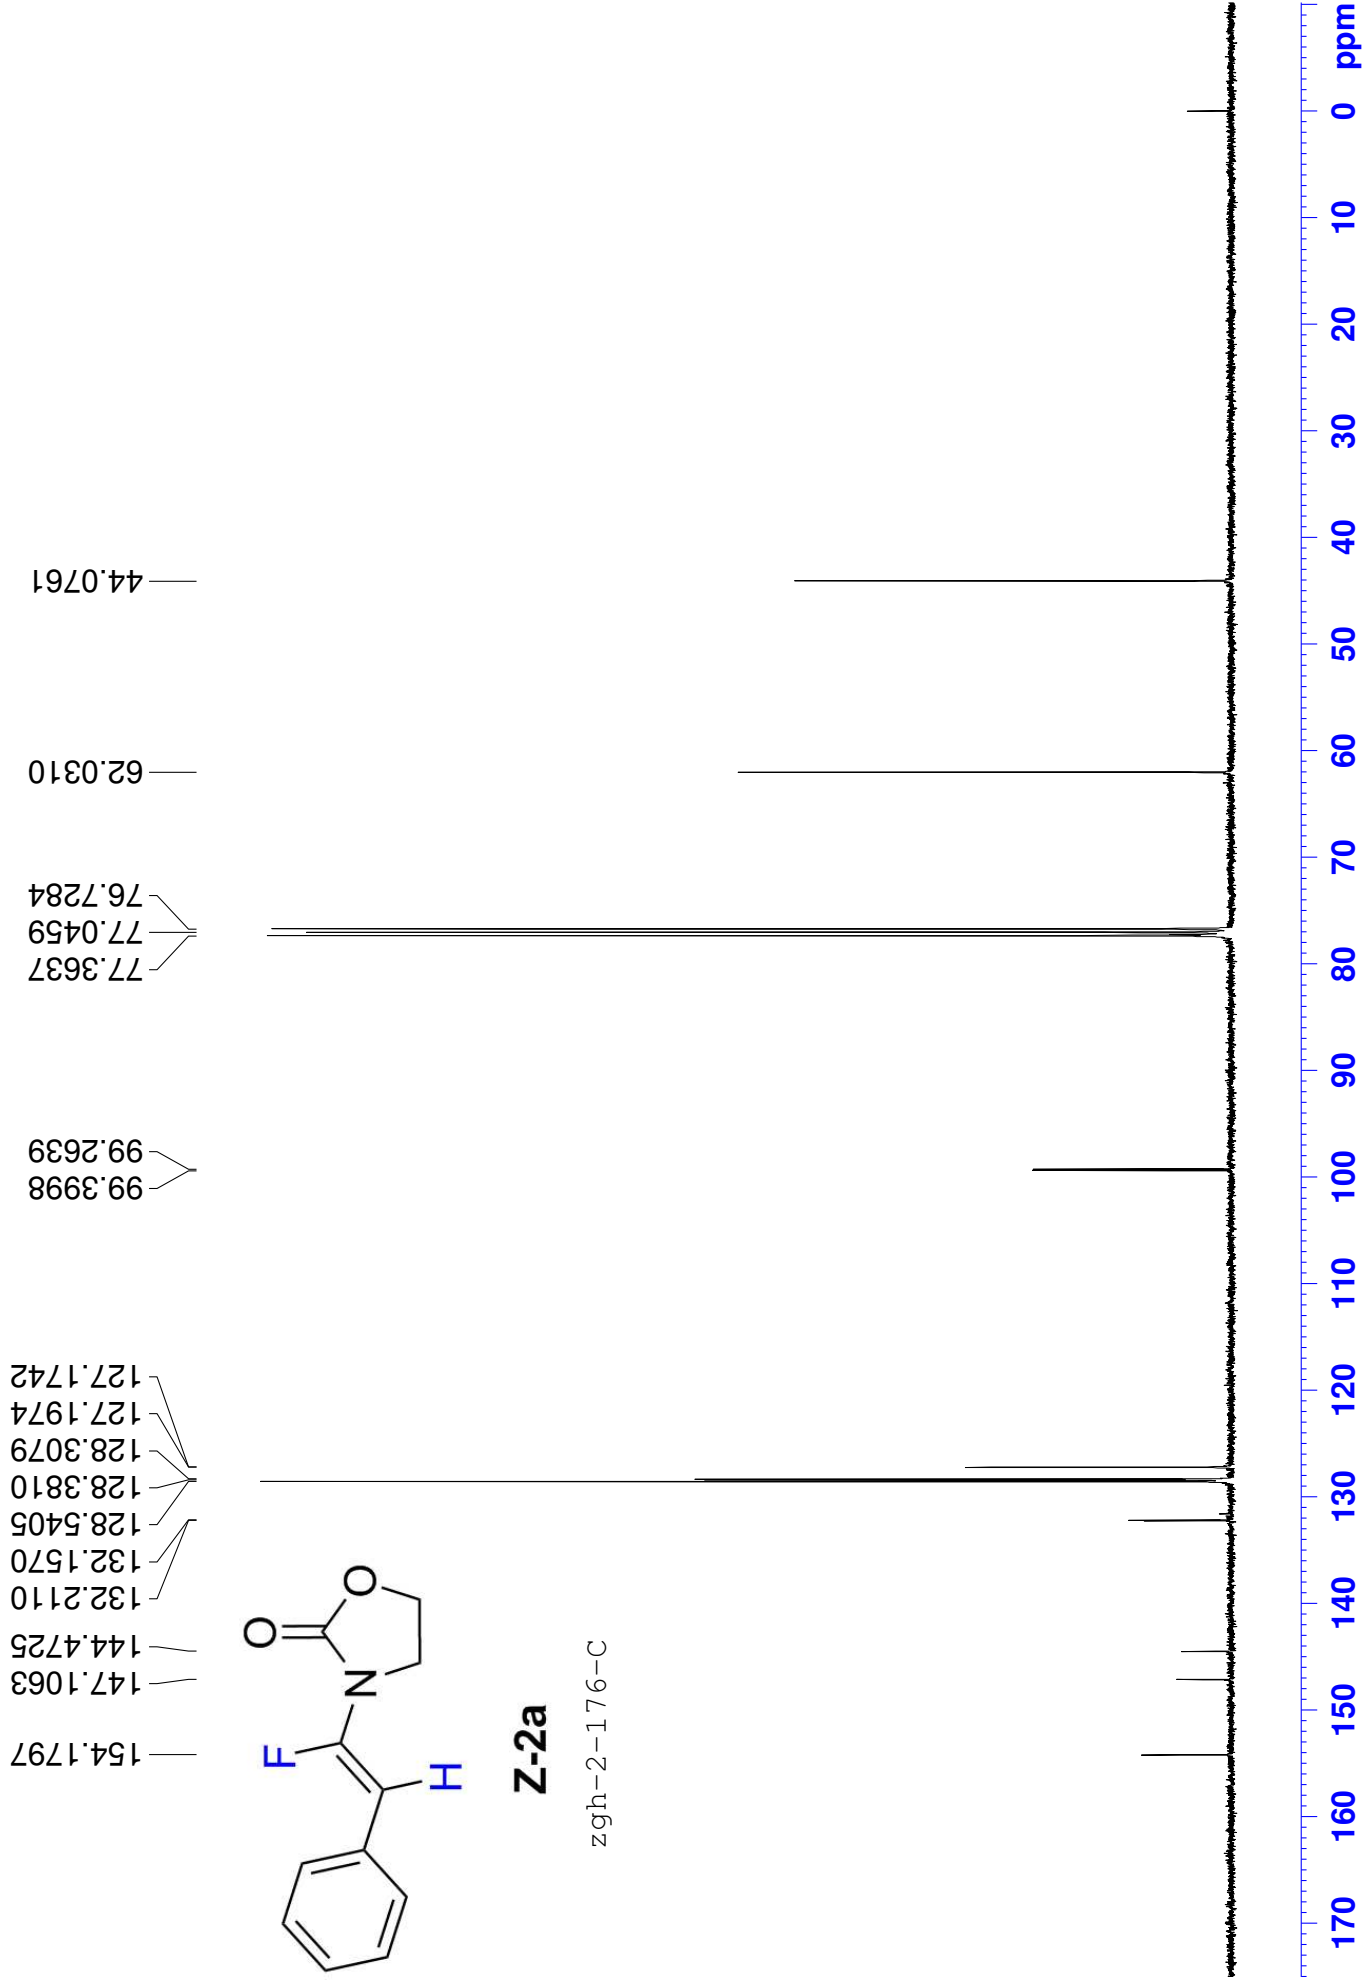

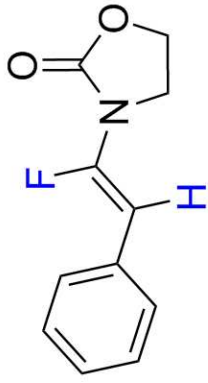

**Z-2a**

zgh-2-176-F

—99.2869

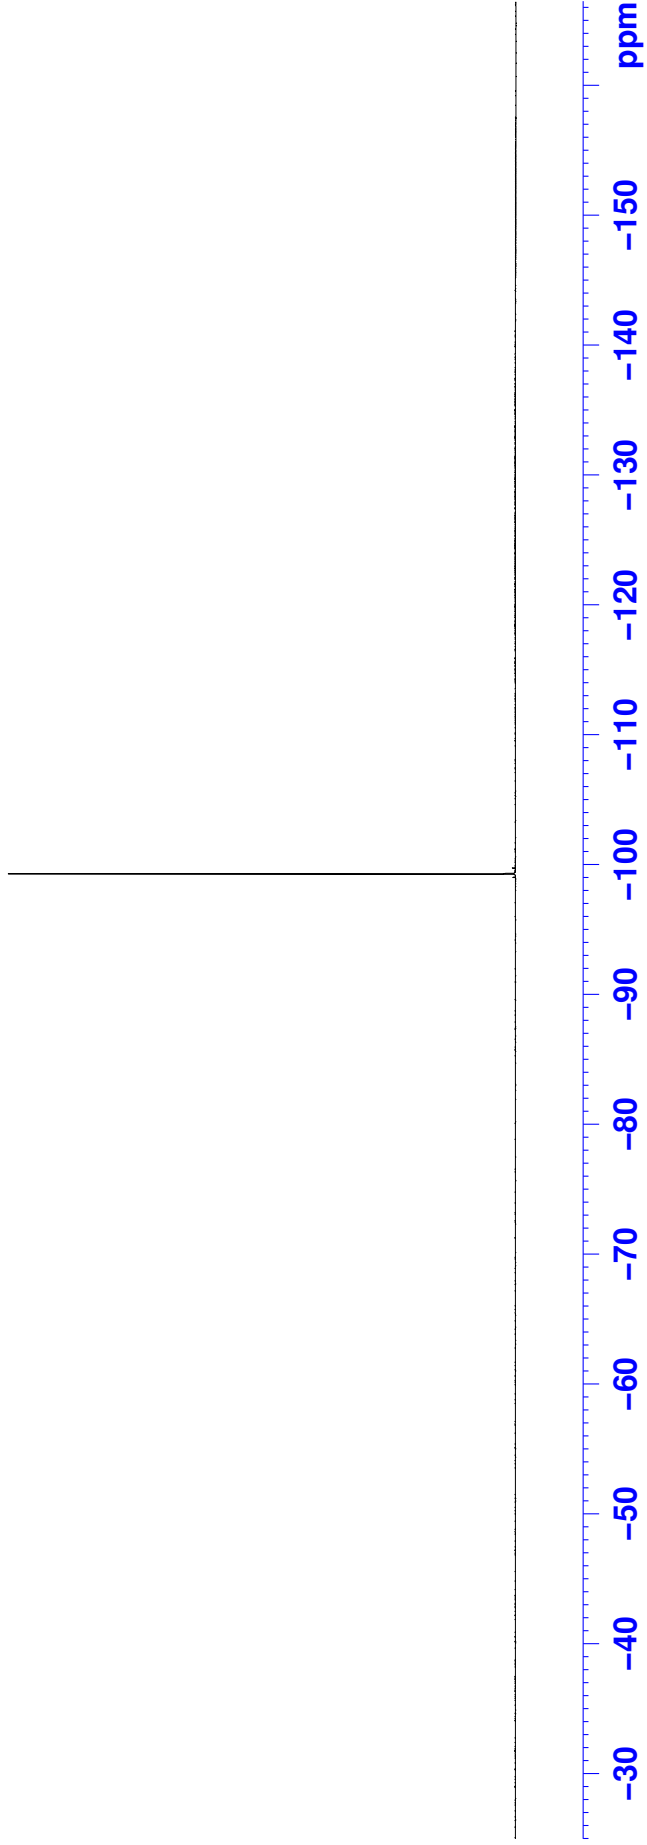

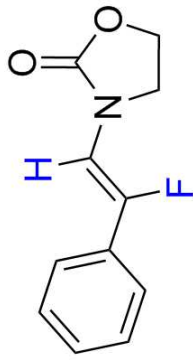

**Z-3a**

zgh-6-41 (2) -H

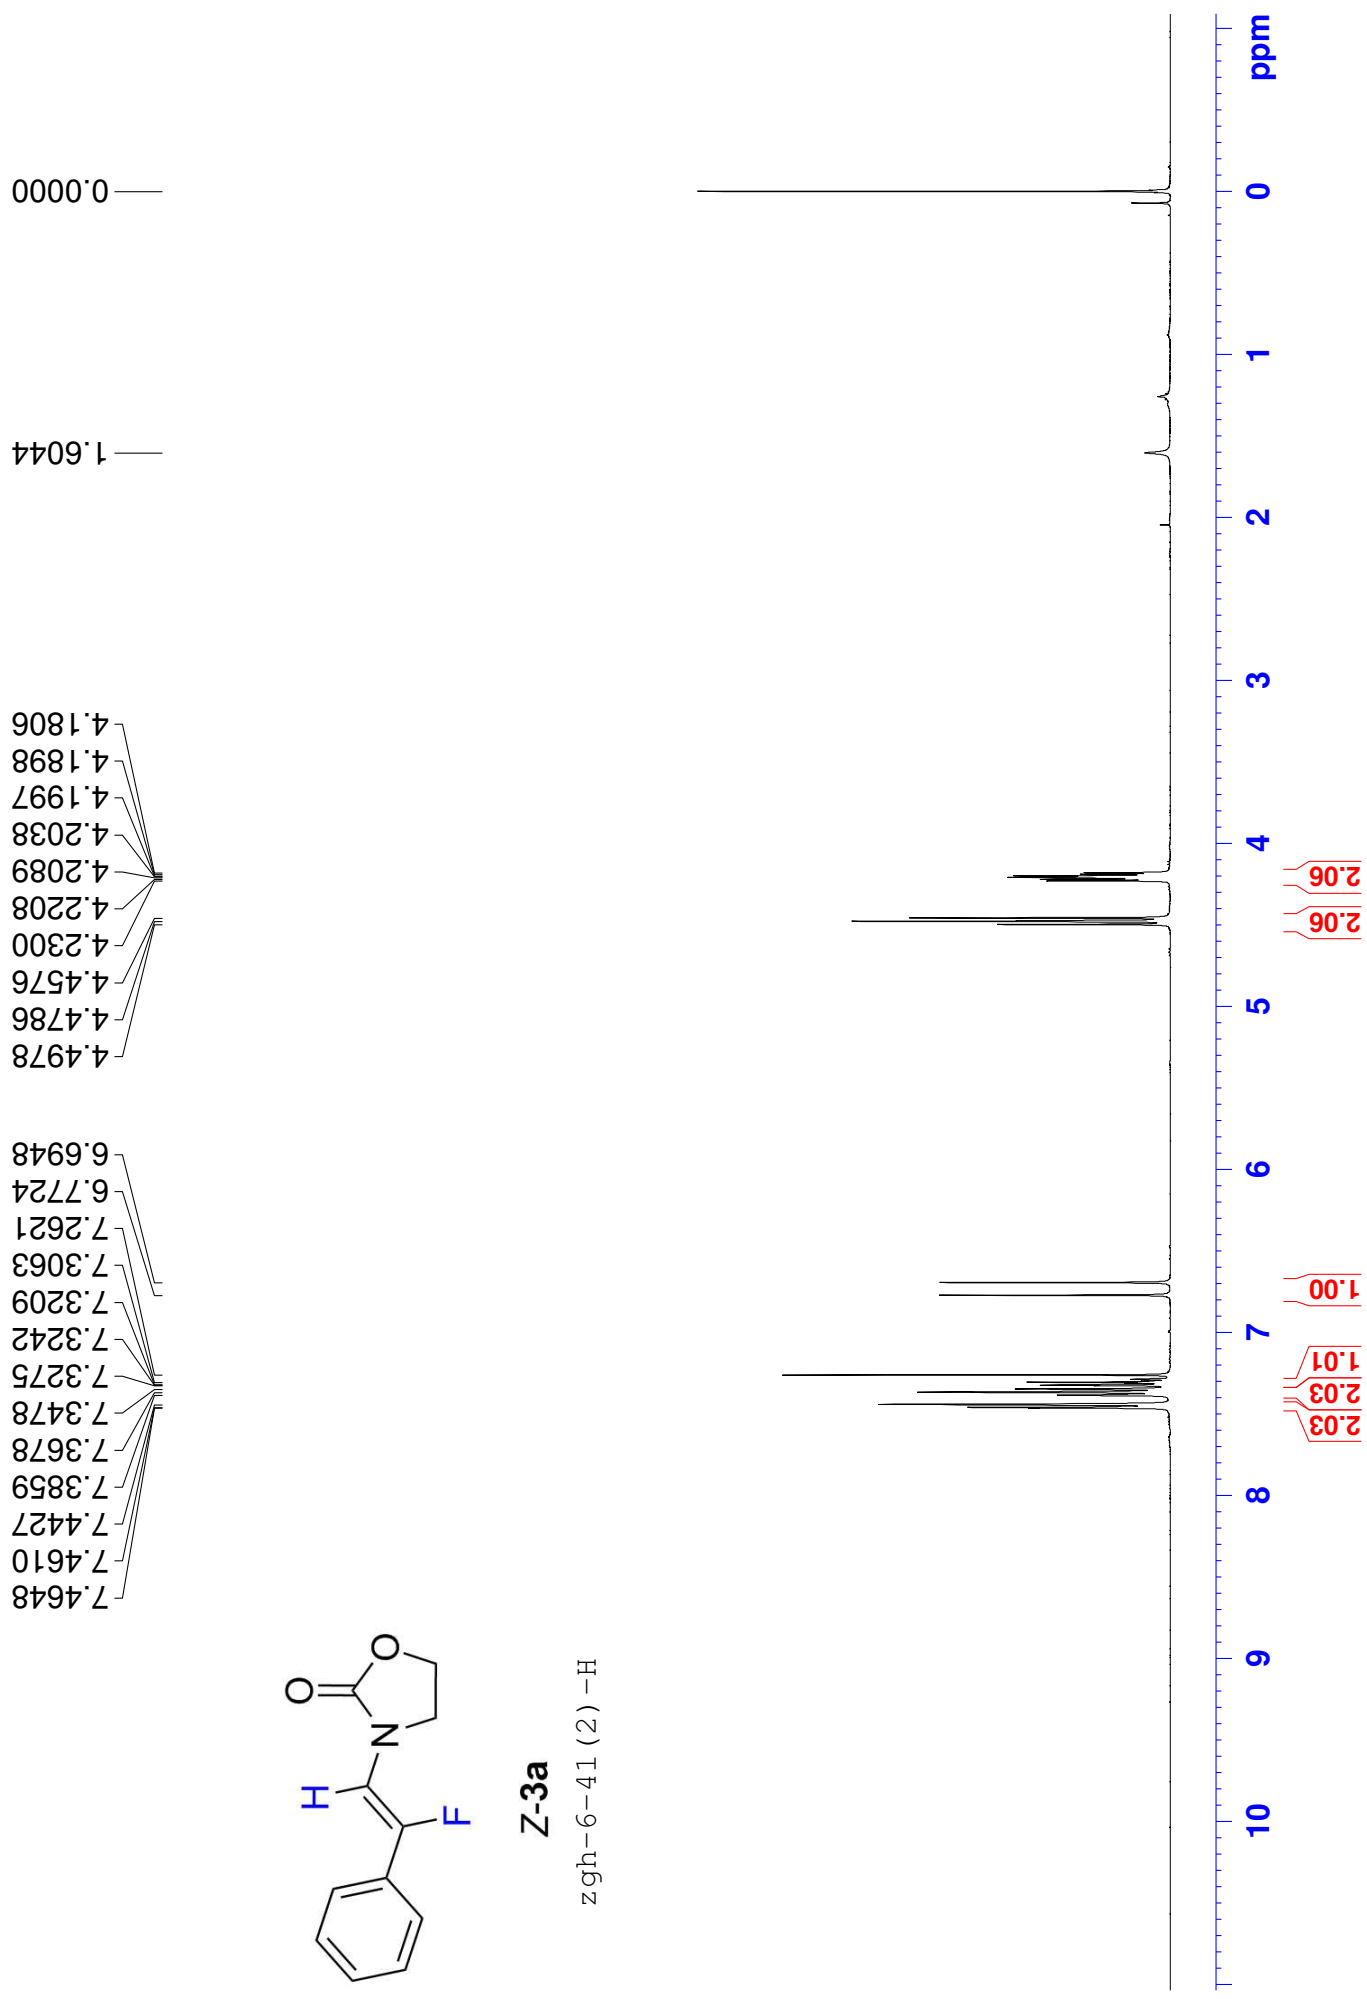

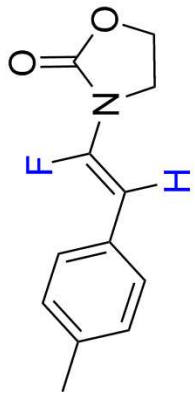

**Z-2b**

zgh-2-158-H

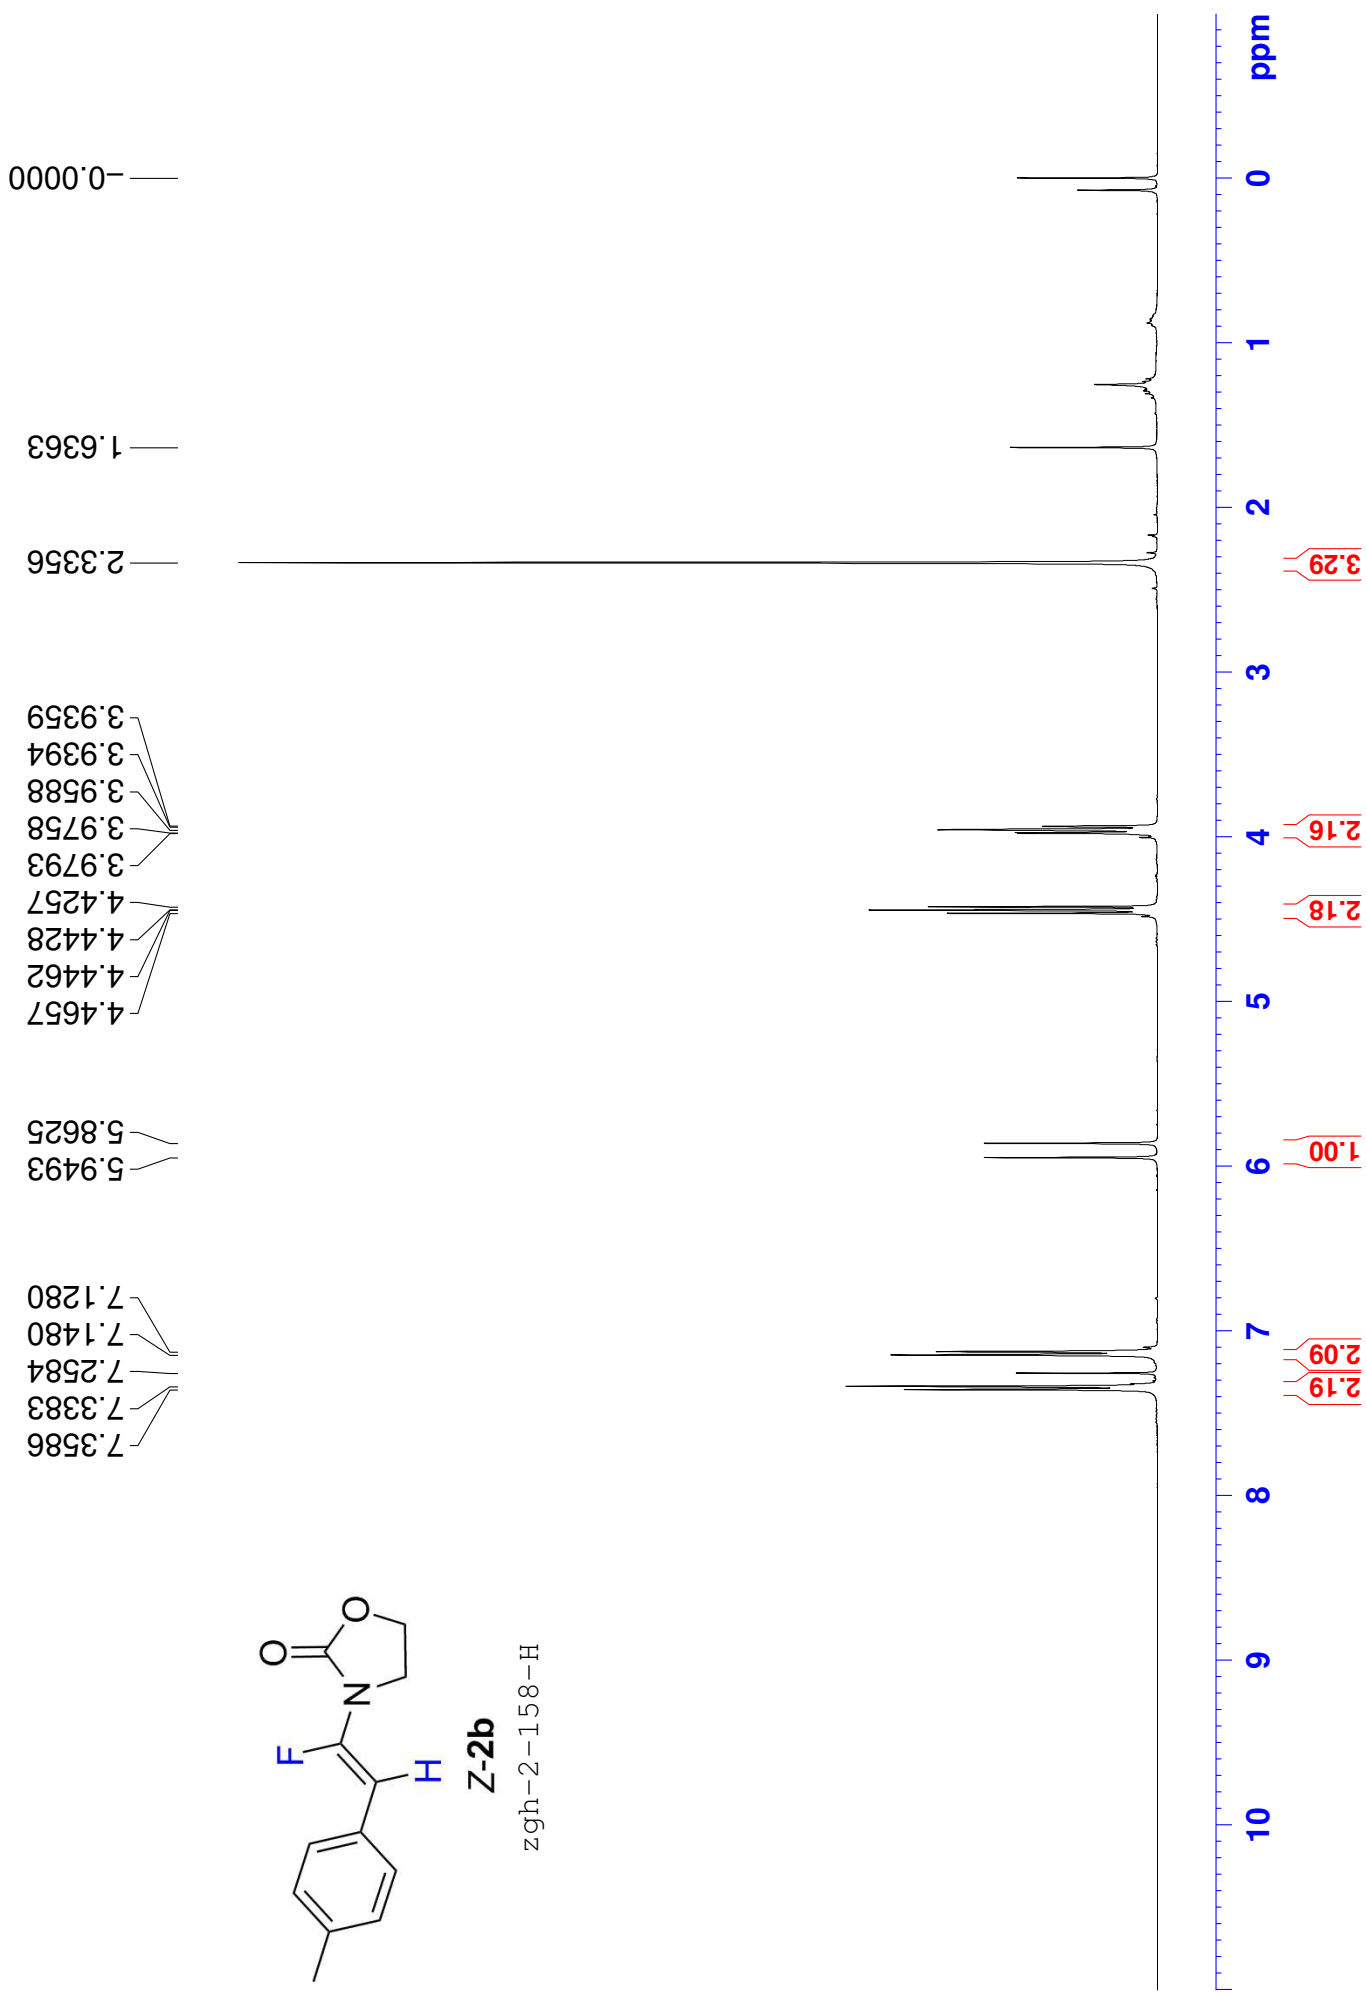

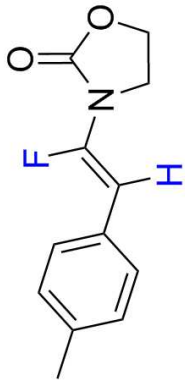

**Z-2b**

zgh-2-158-C

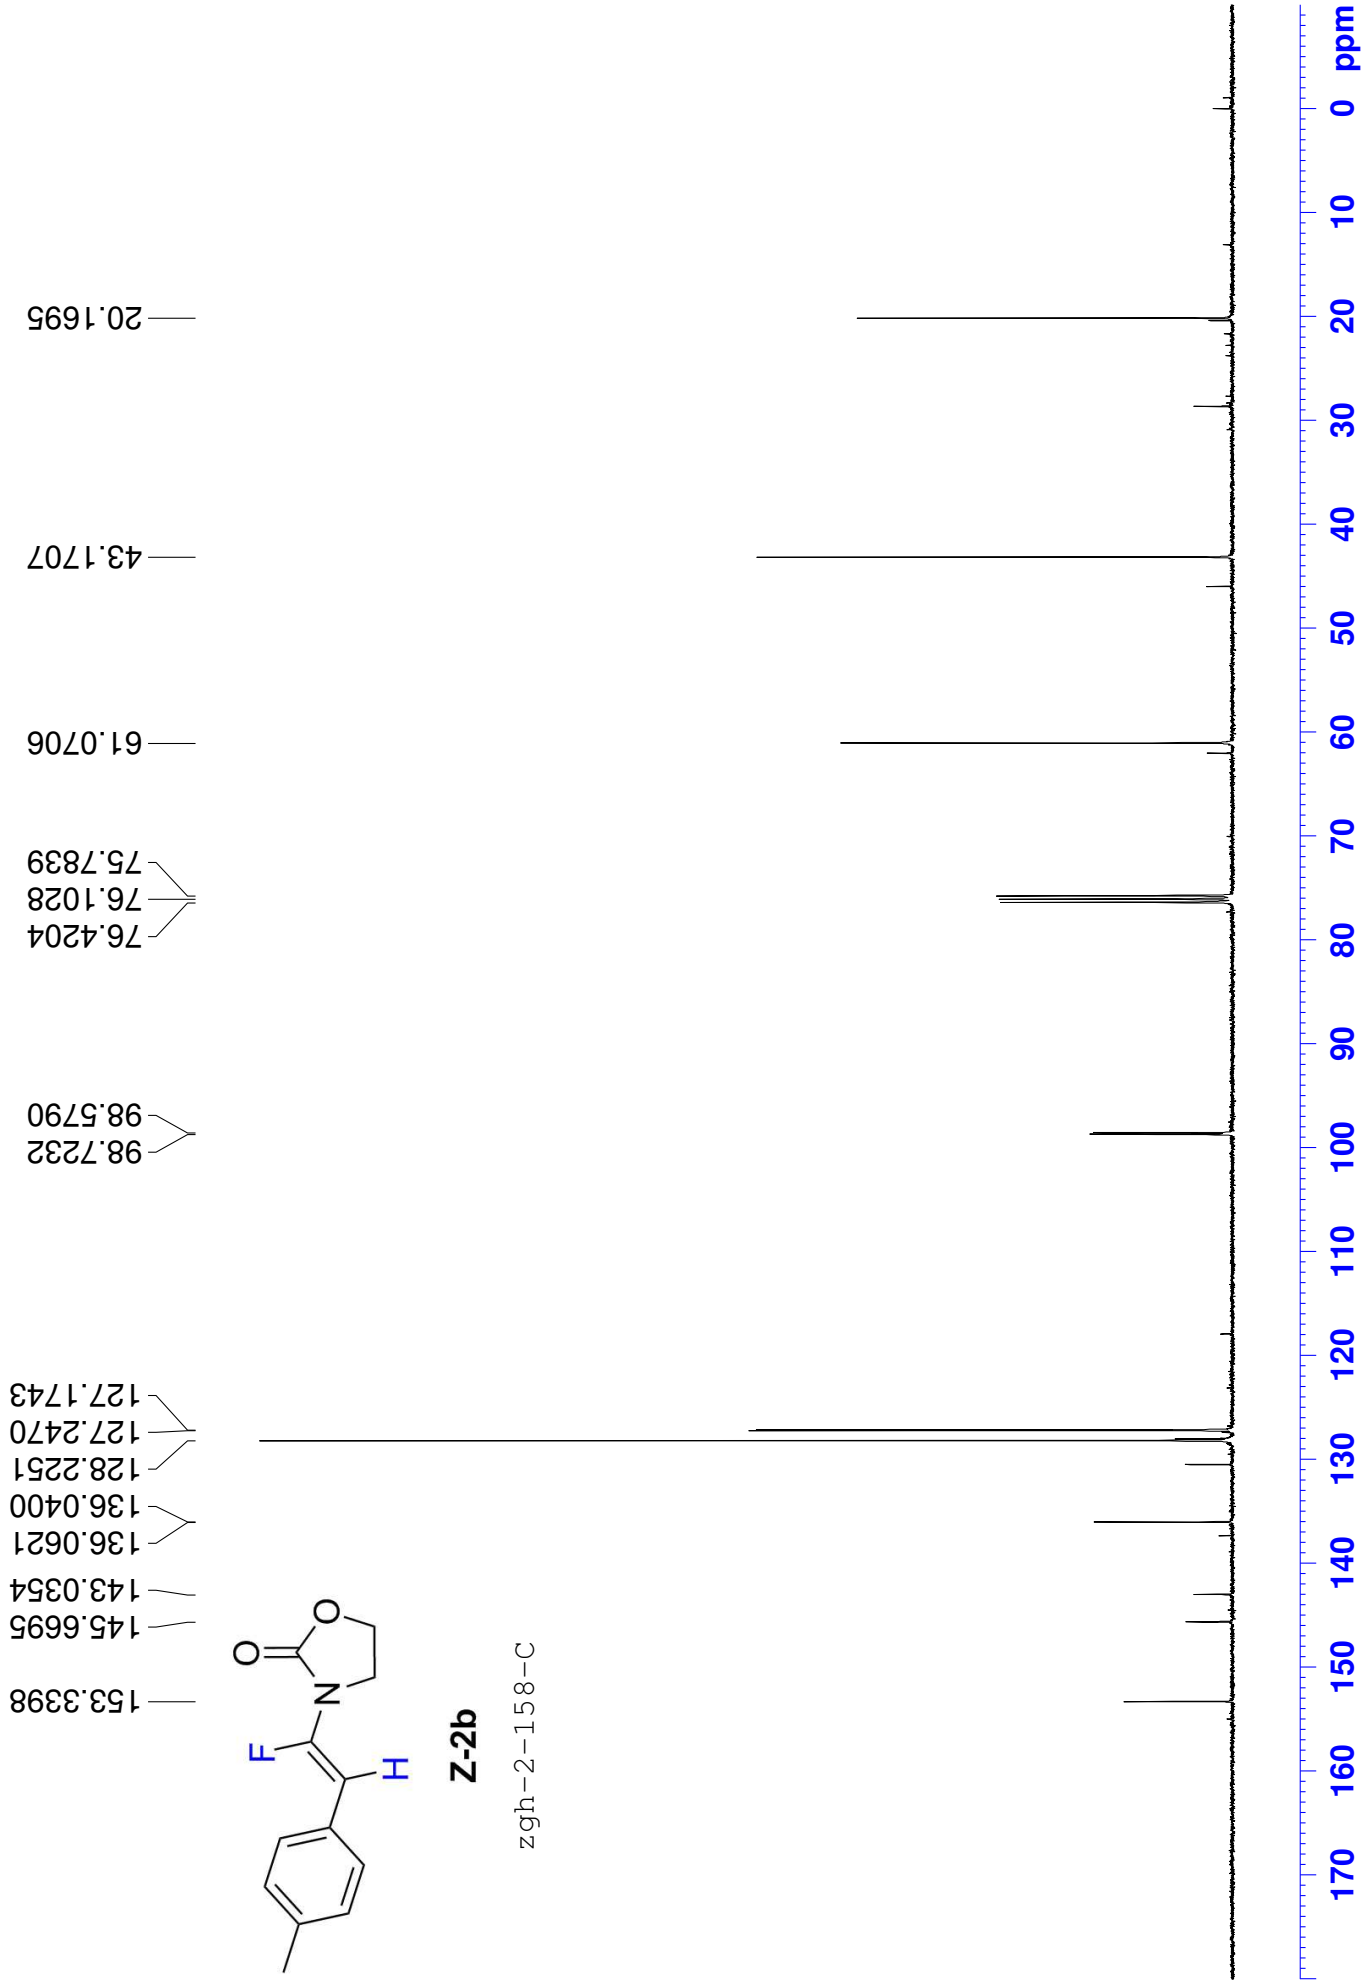

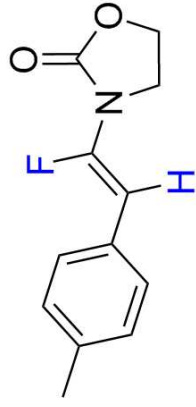

**Z-2b**

zgh-2-158-F

—99.8240

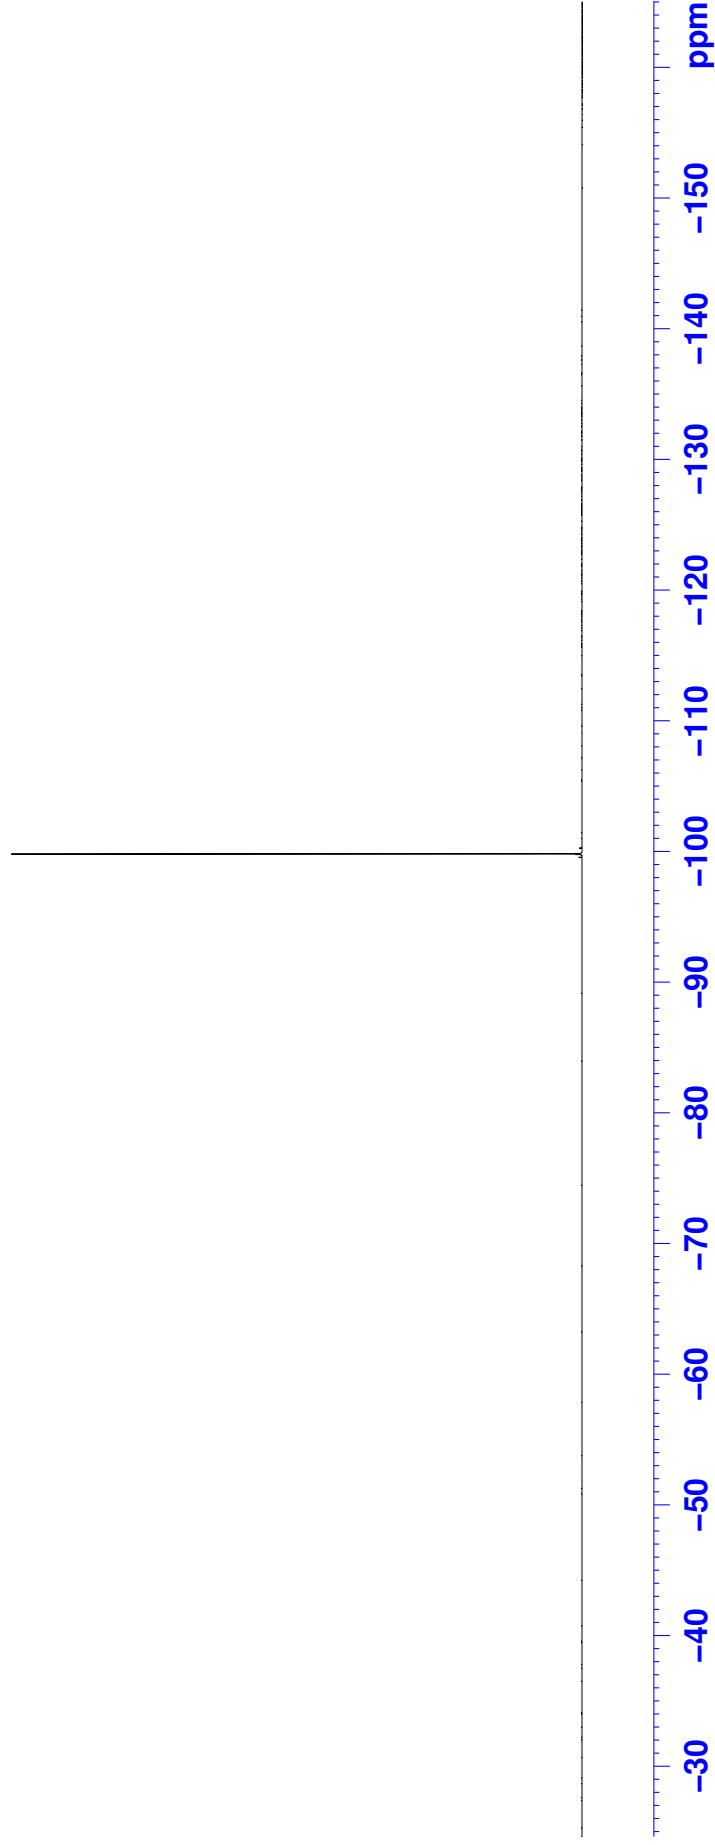



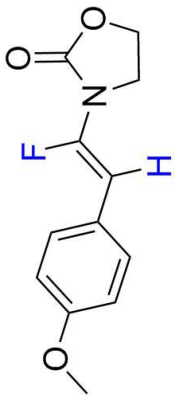

Z-2c

zgh-2-178-H

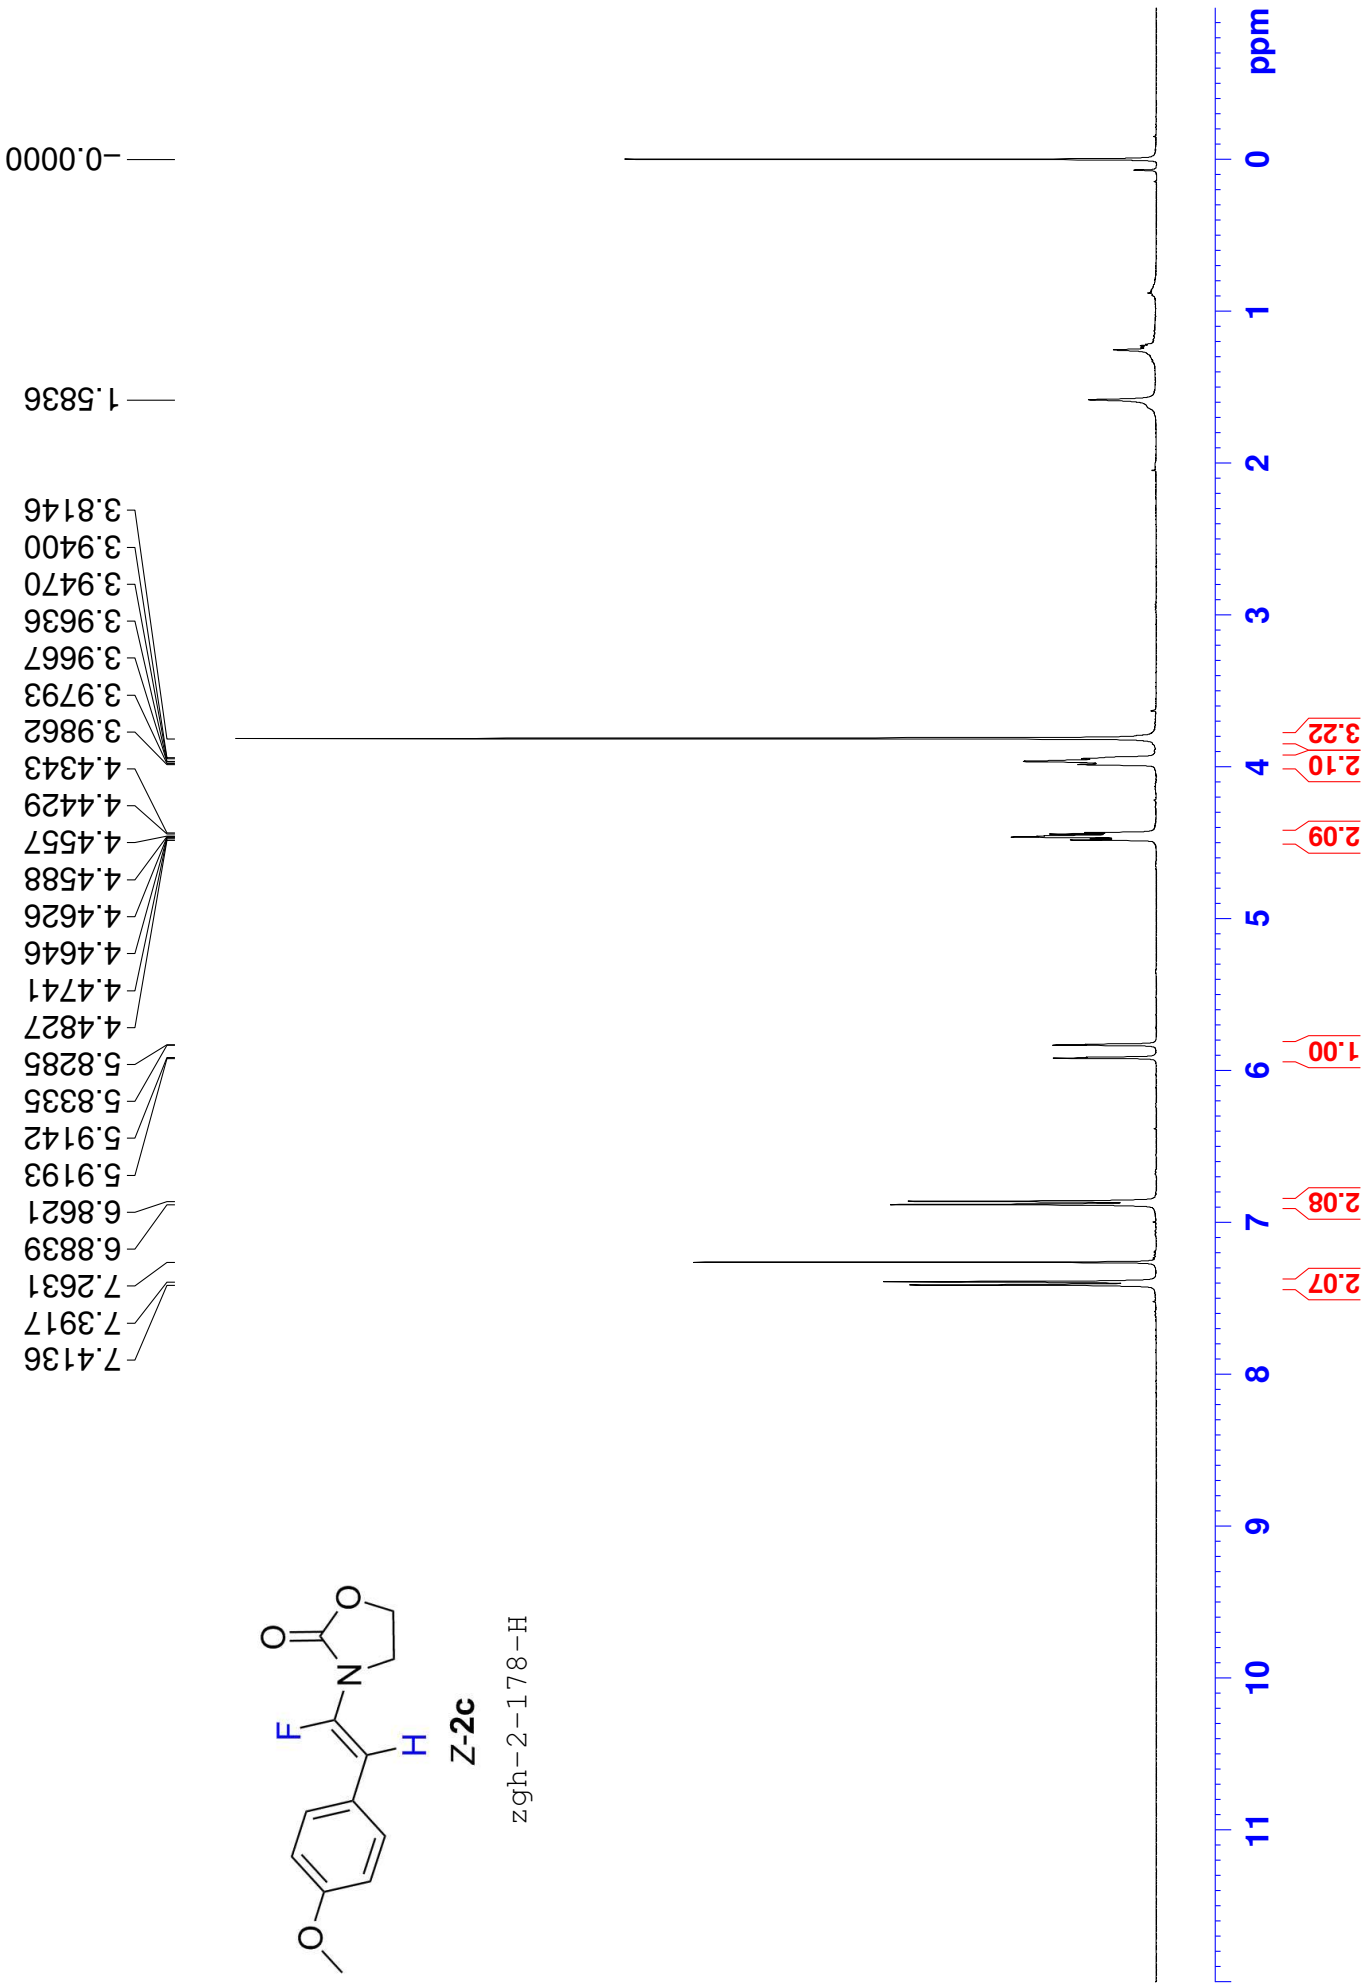

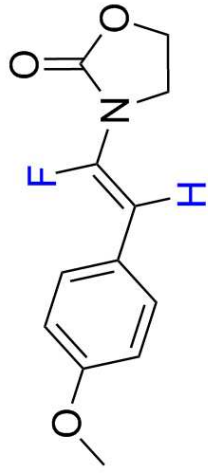

**Z-2c**

zgh-2-178-C

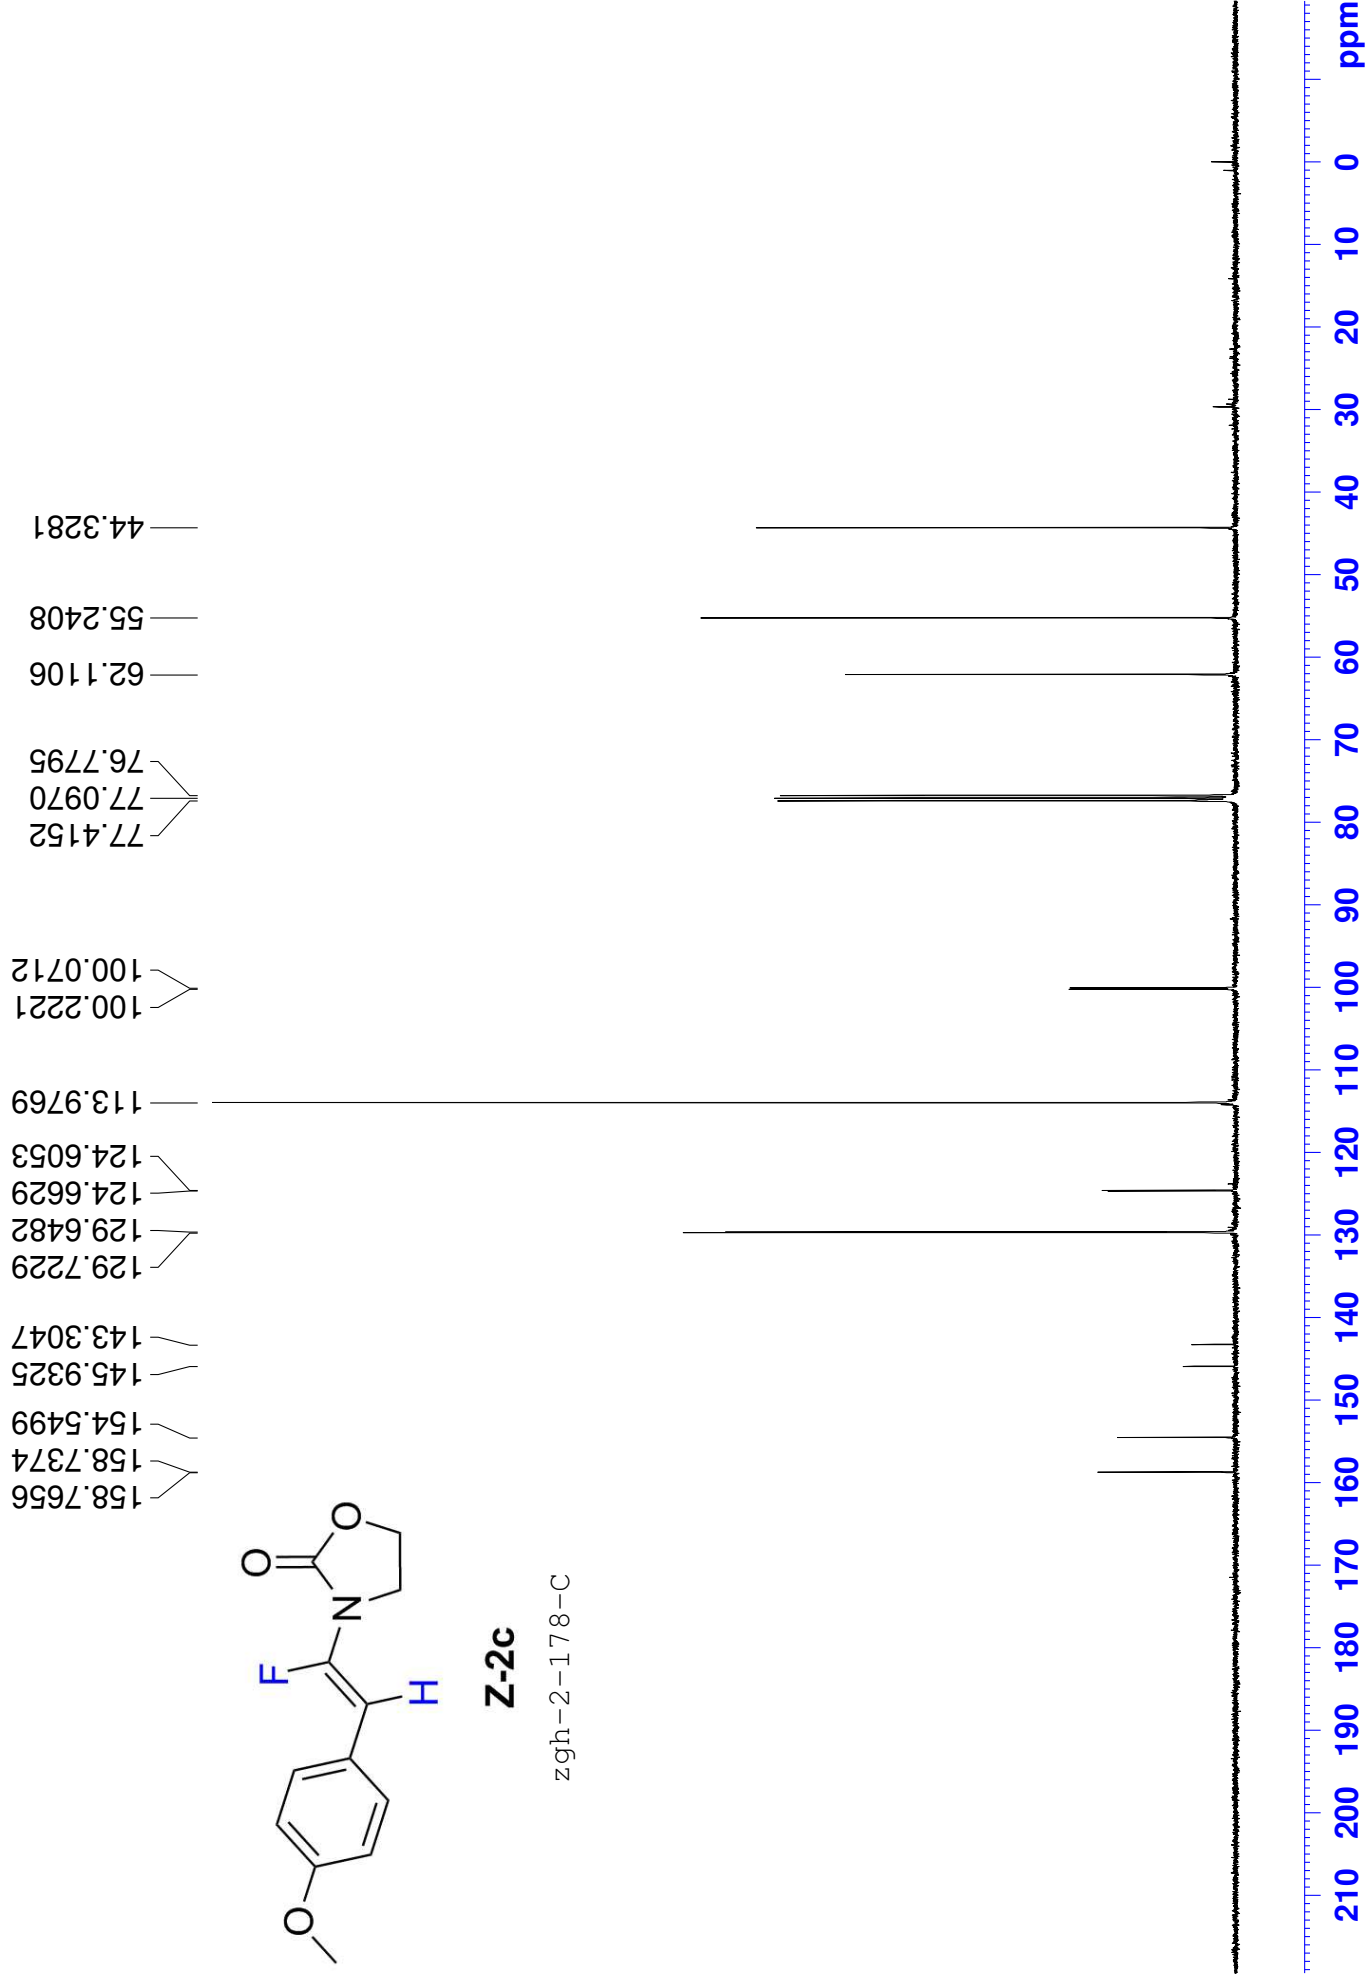

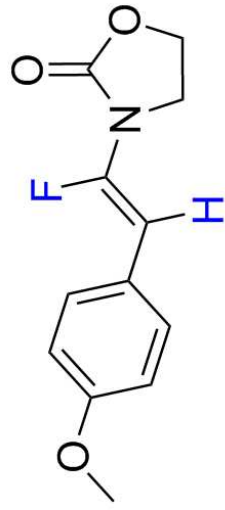

**Z-2c**

zgh-2-178-F

— -101.1844

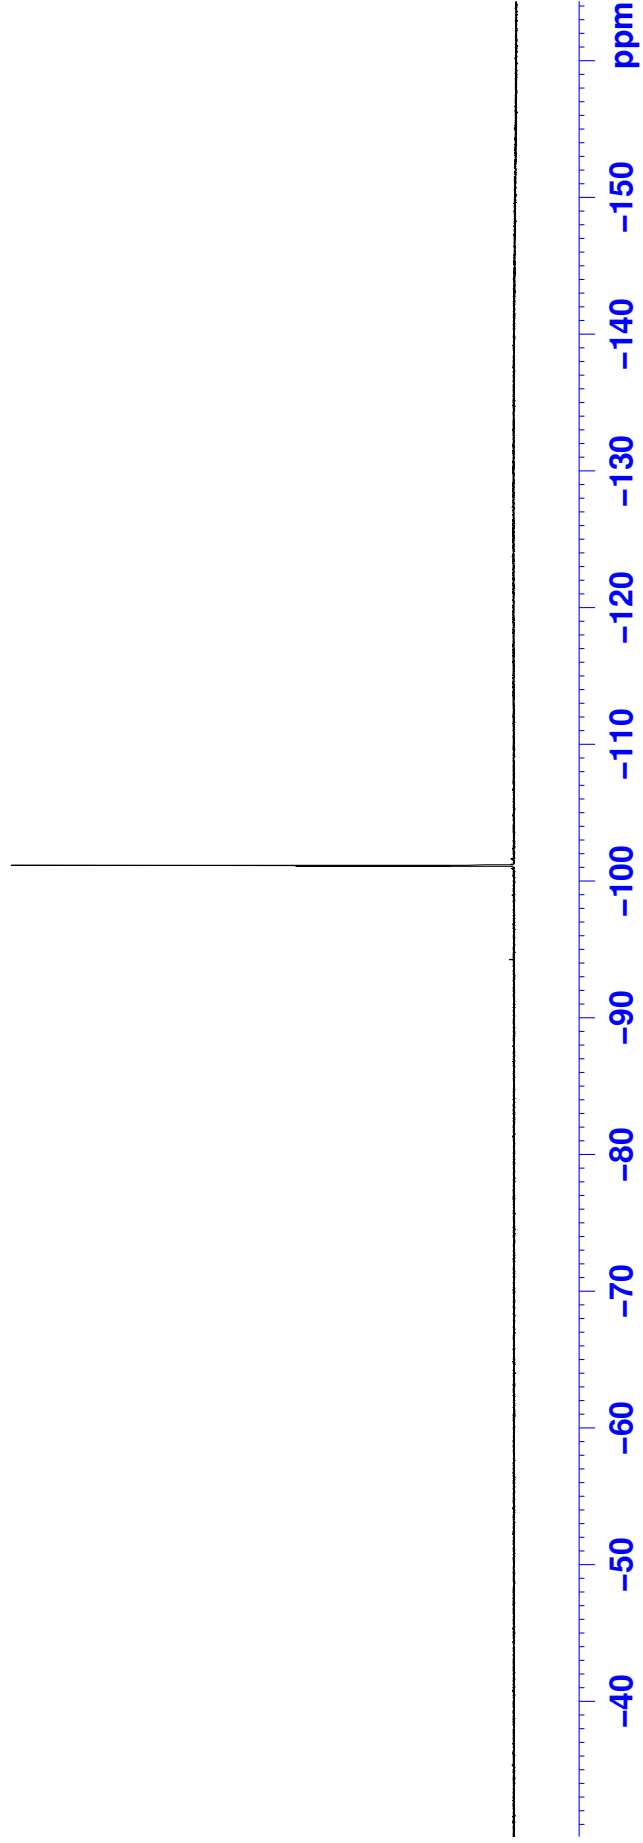

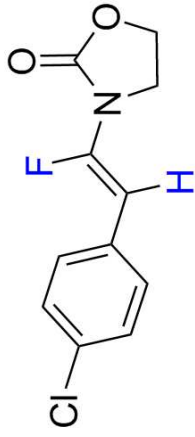

Z-2d

zqh-6-63-H

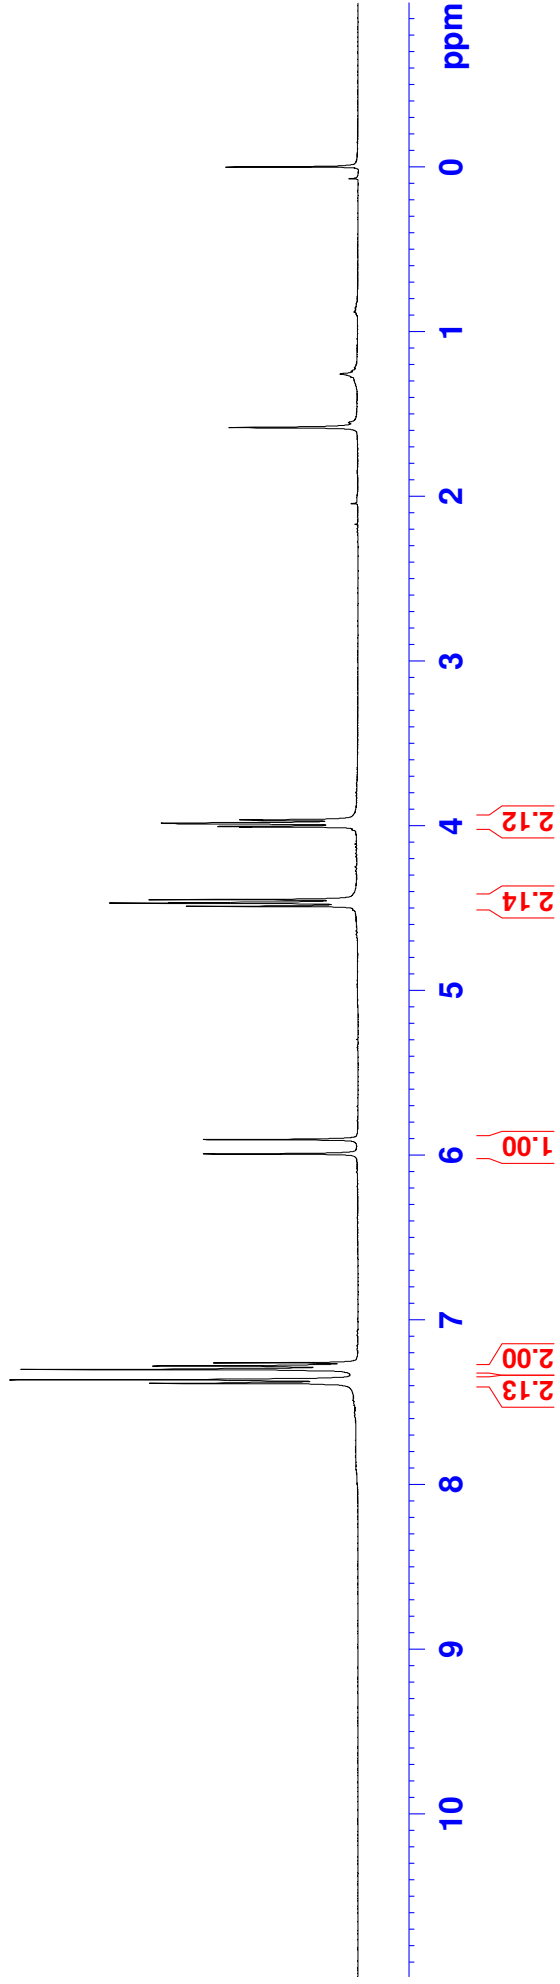

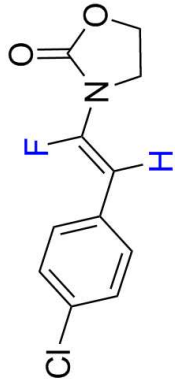

Z-2d

zgh-6-63-C

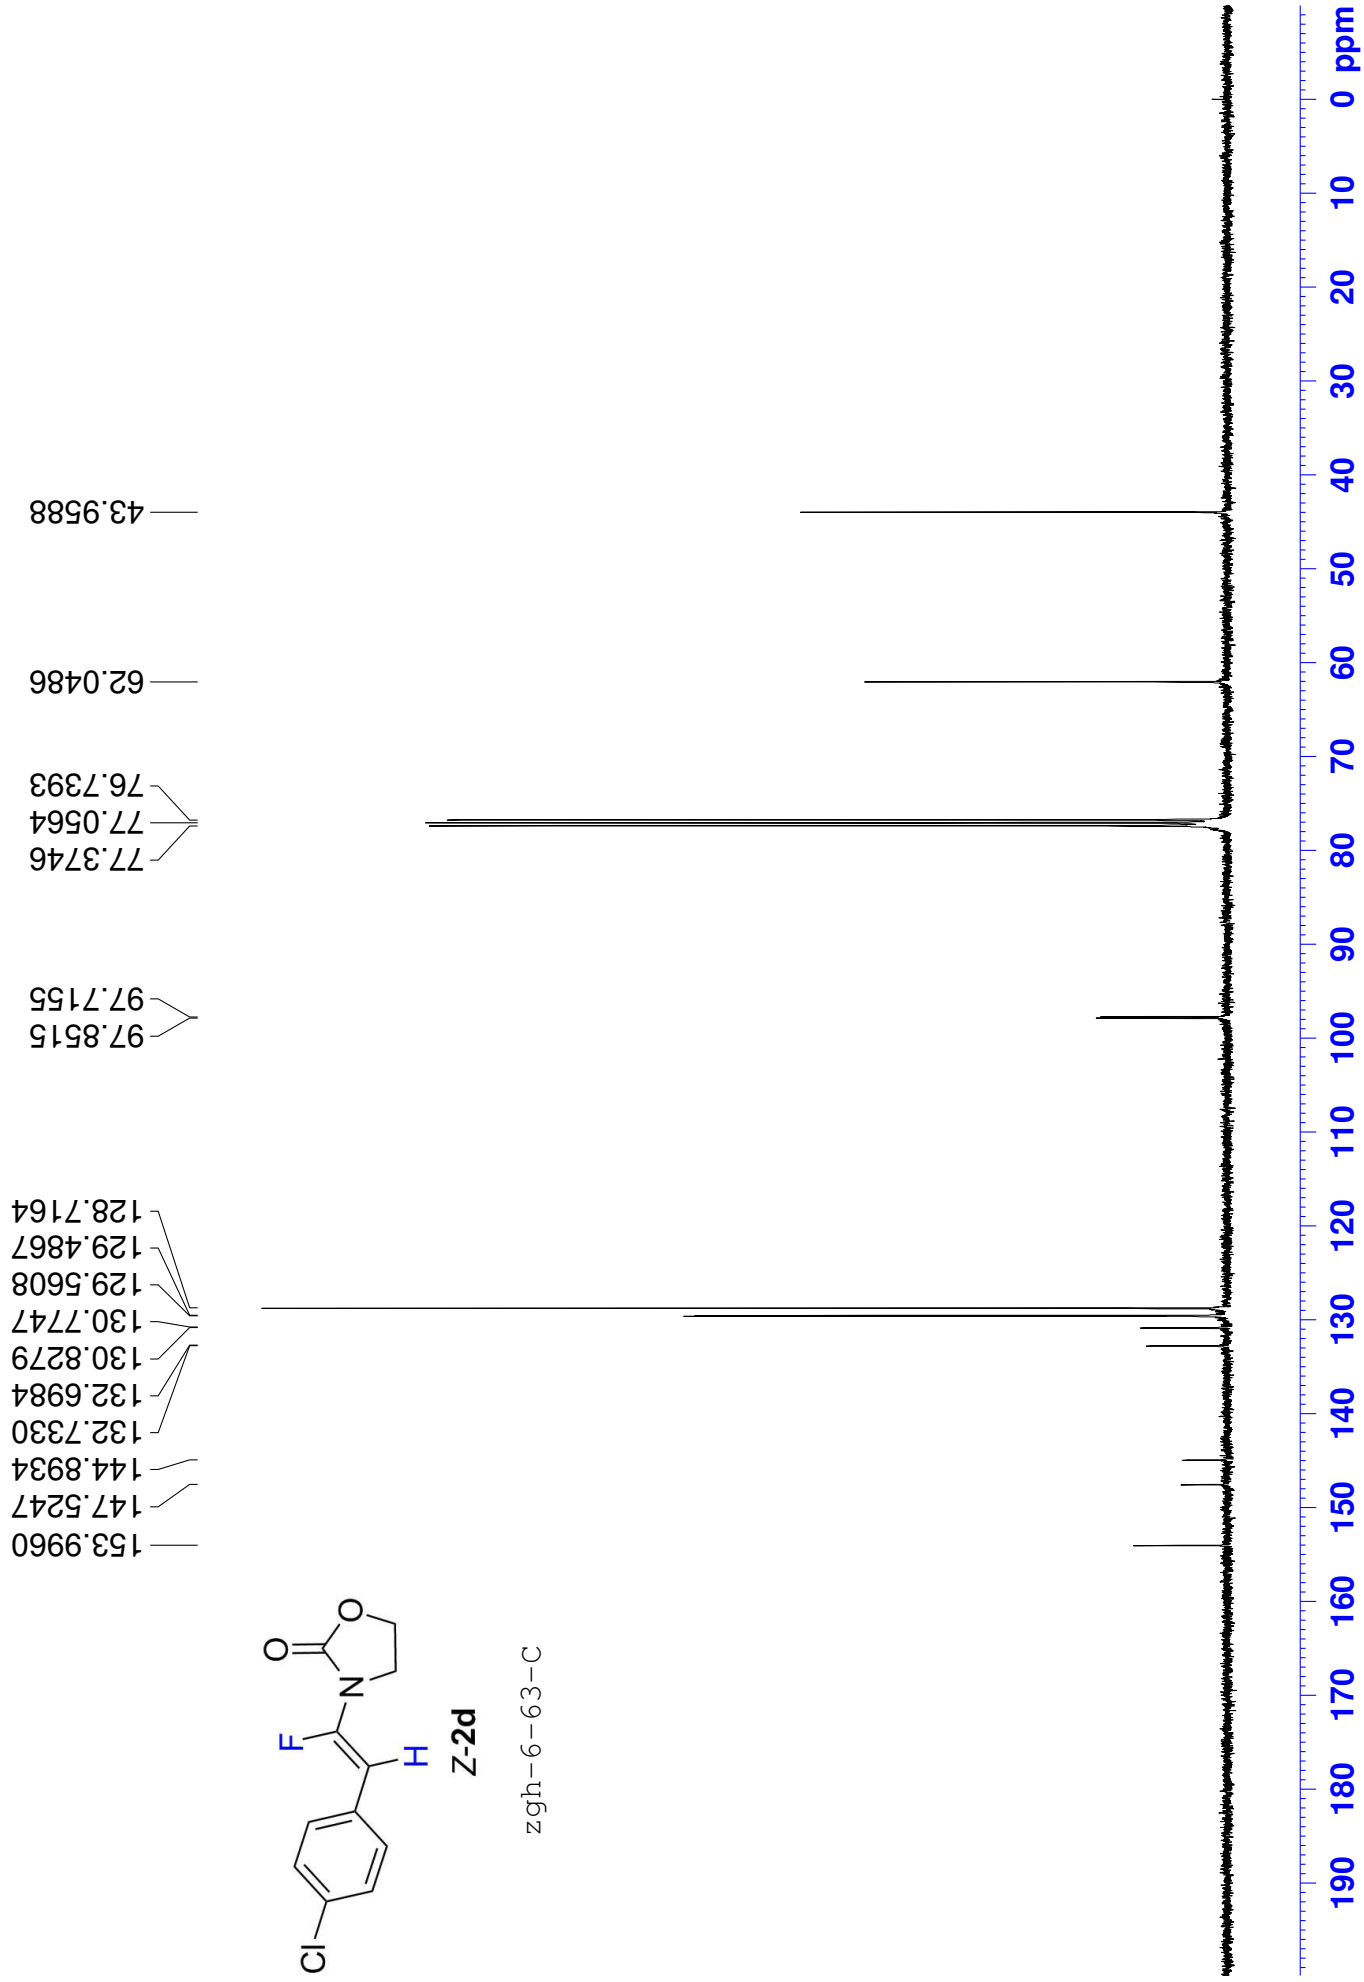

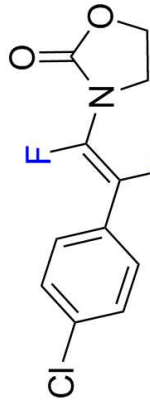

Z-2d

zgh-6-63-F

-98.9613

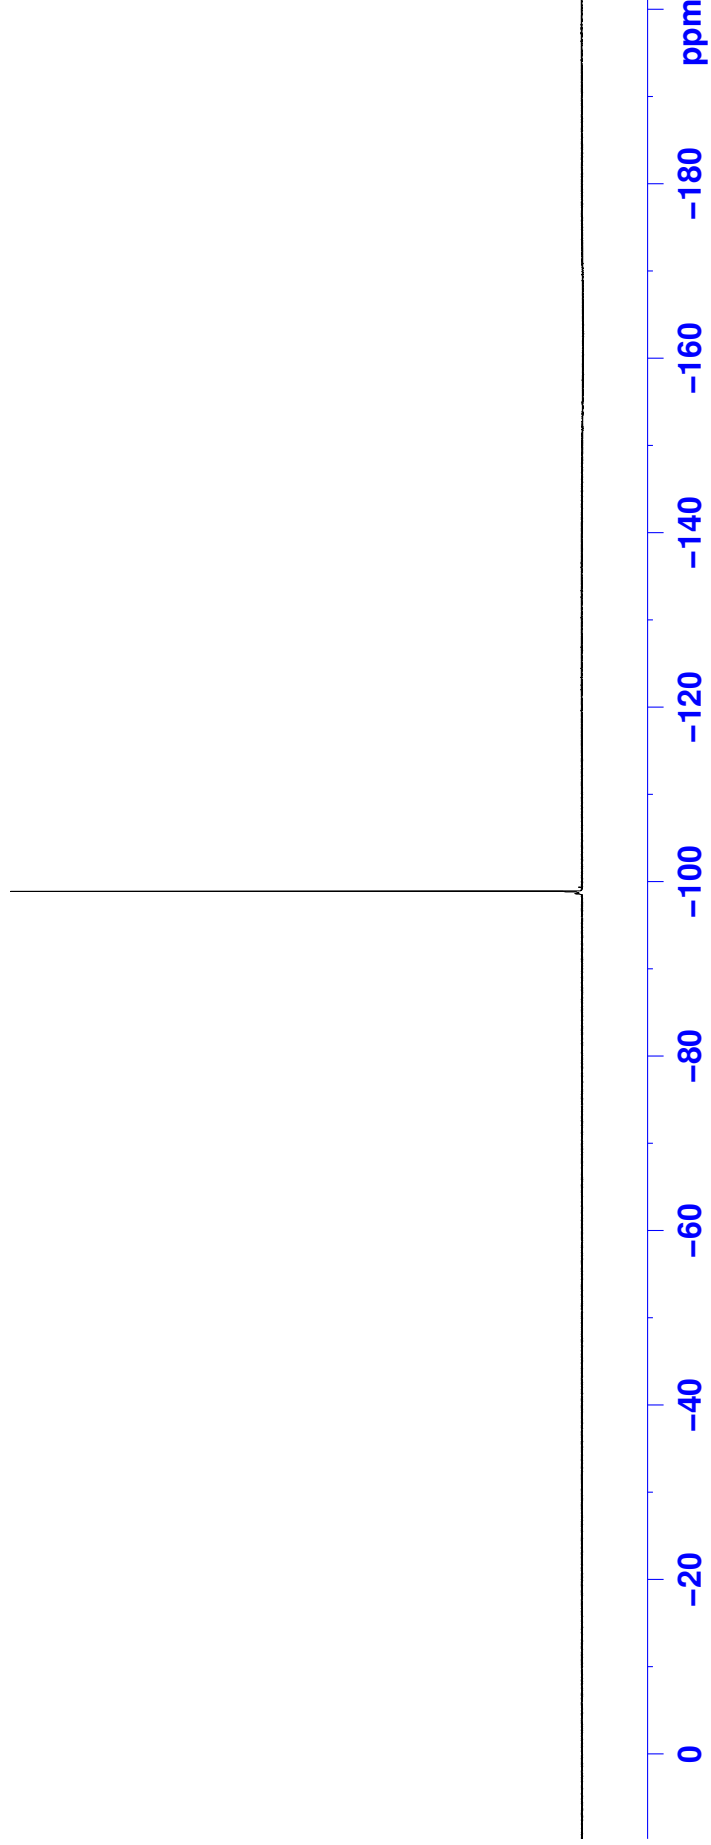

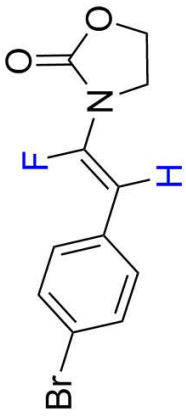

Z-2e

zgh-2-161-H

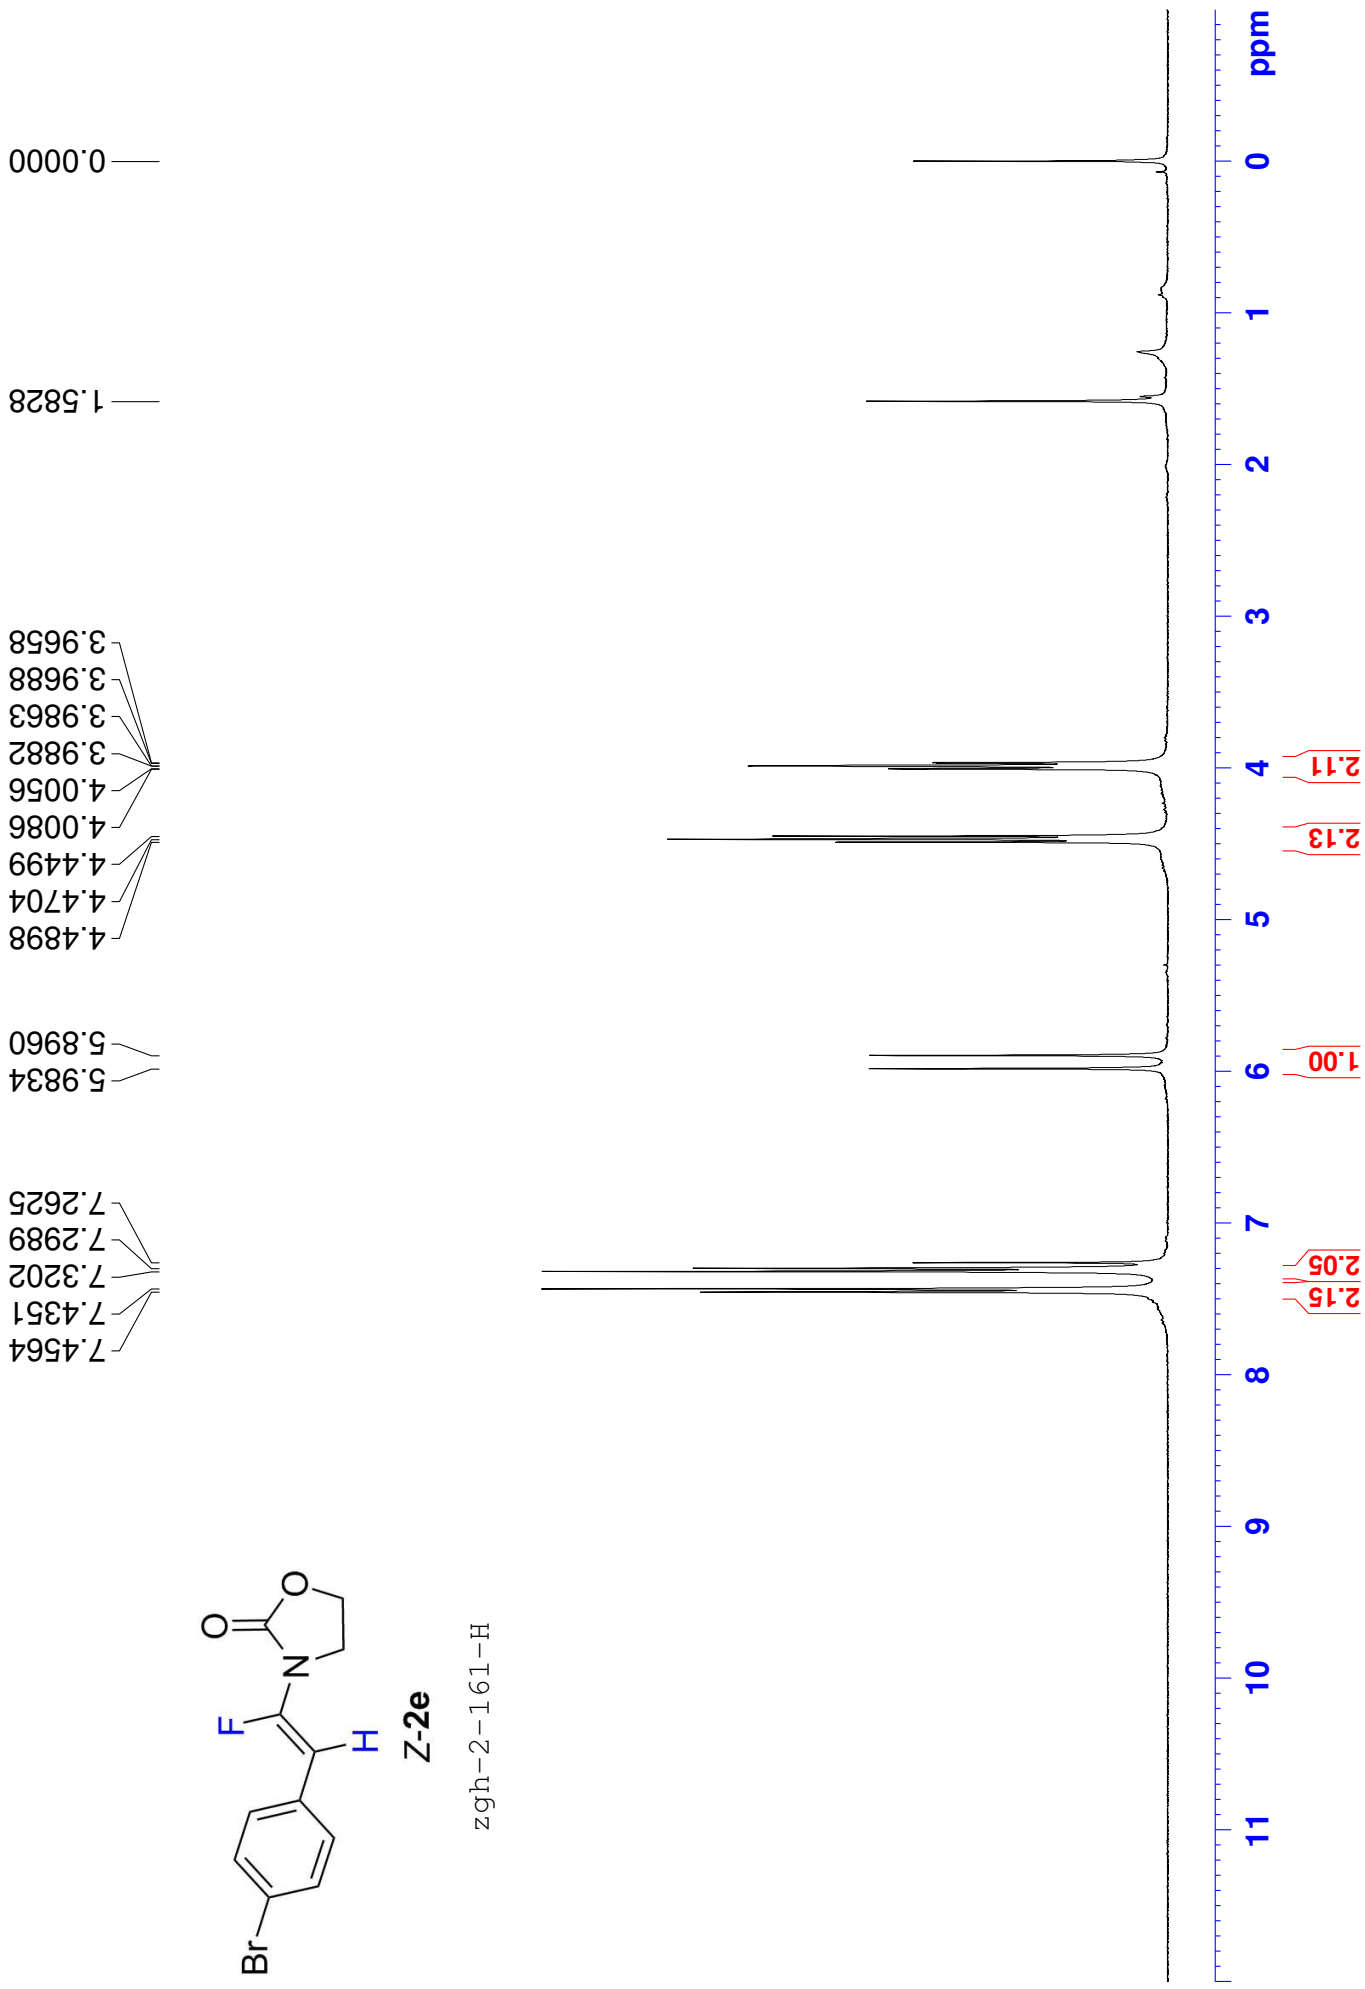

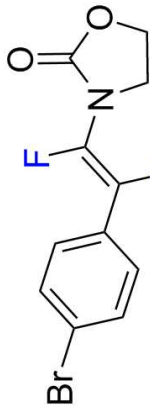

Z-2e

zgh-2-161-C

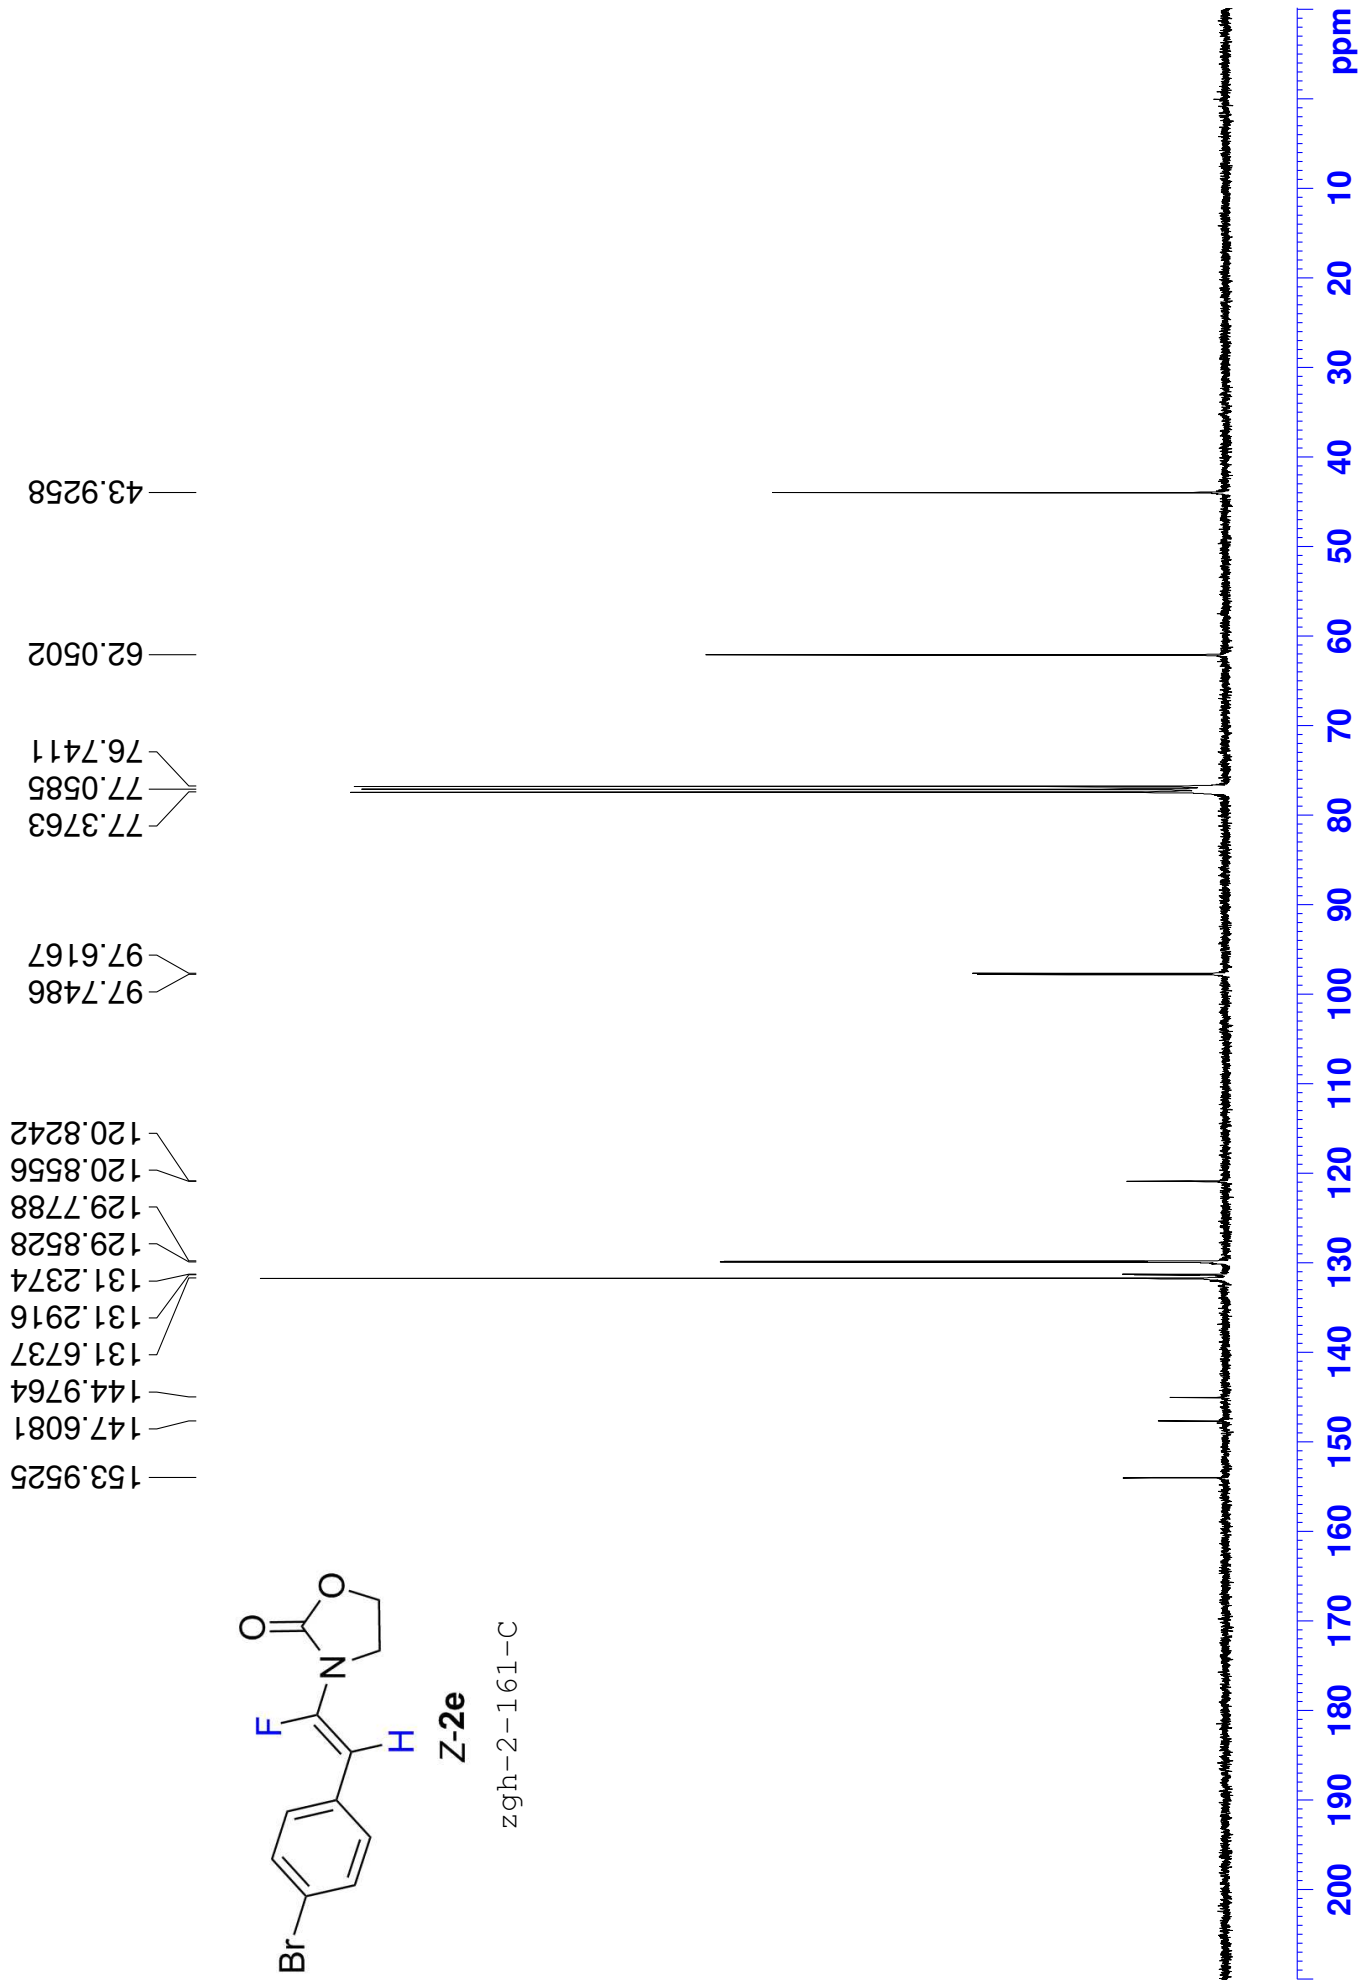



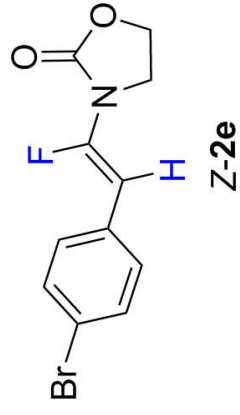

zgh-2-161-F

—98.6946

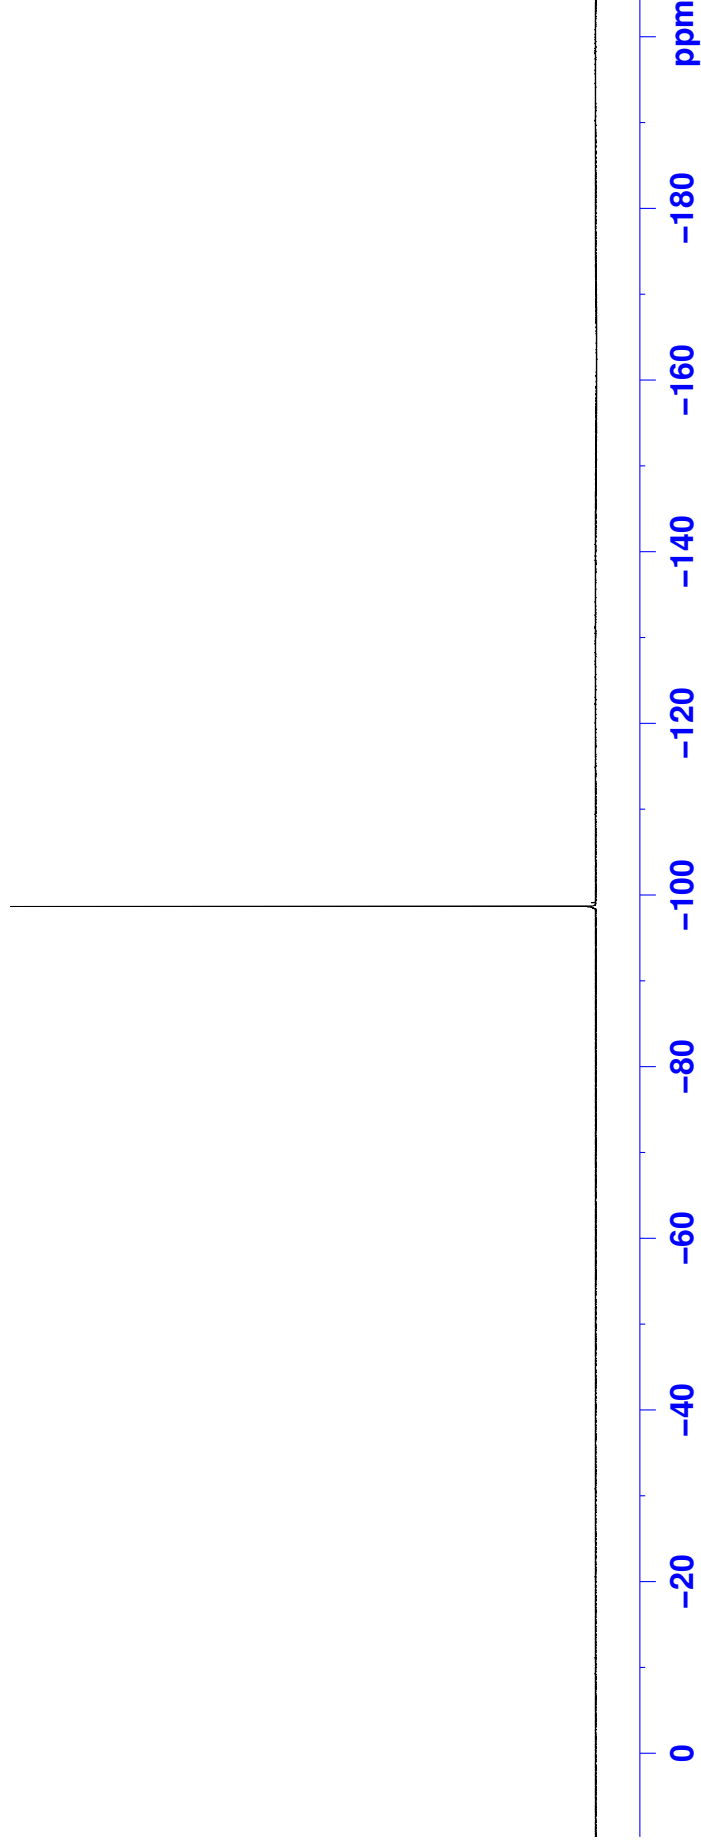

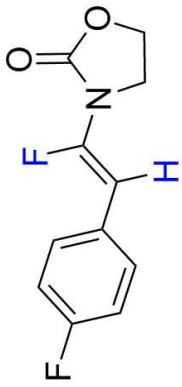

**Z-2f**

zgh-6-64-H

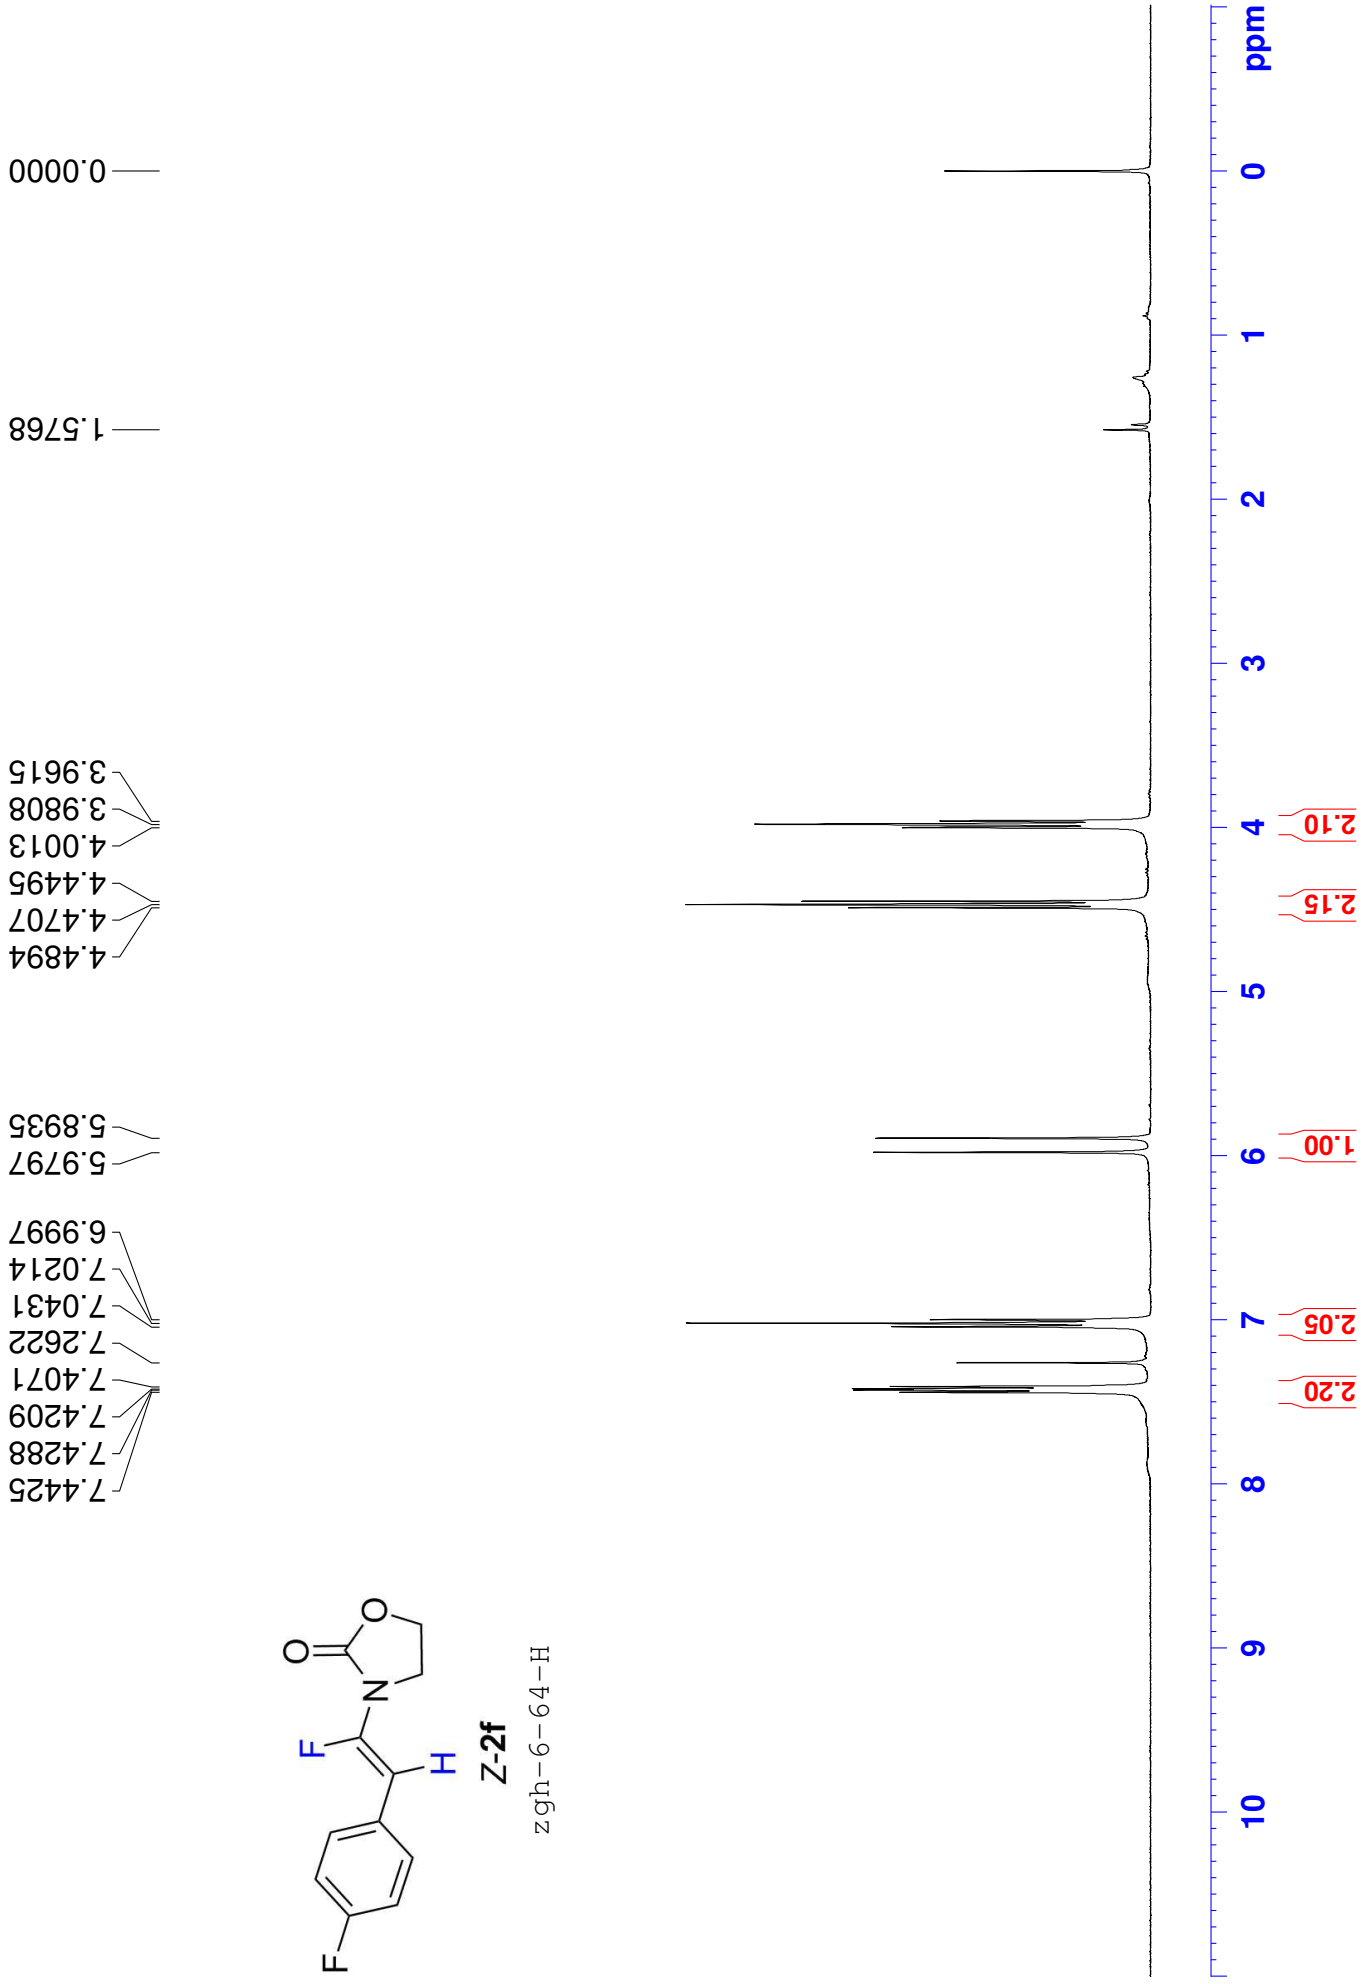

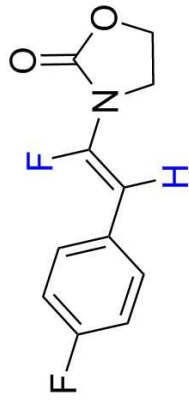

Z-2f

zgh-6-64-C

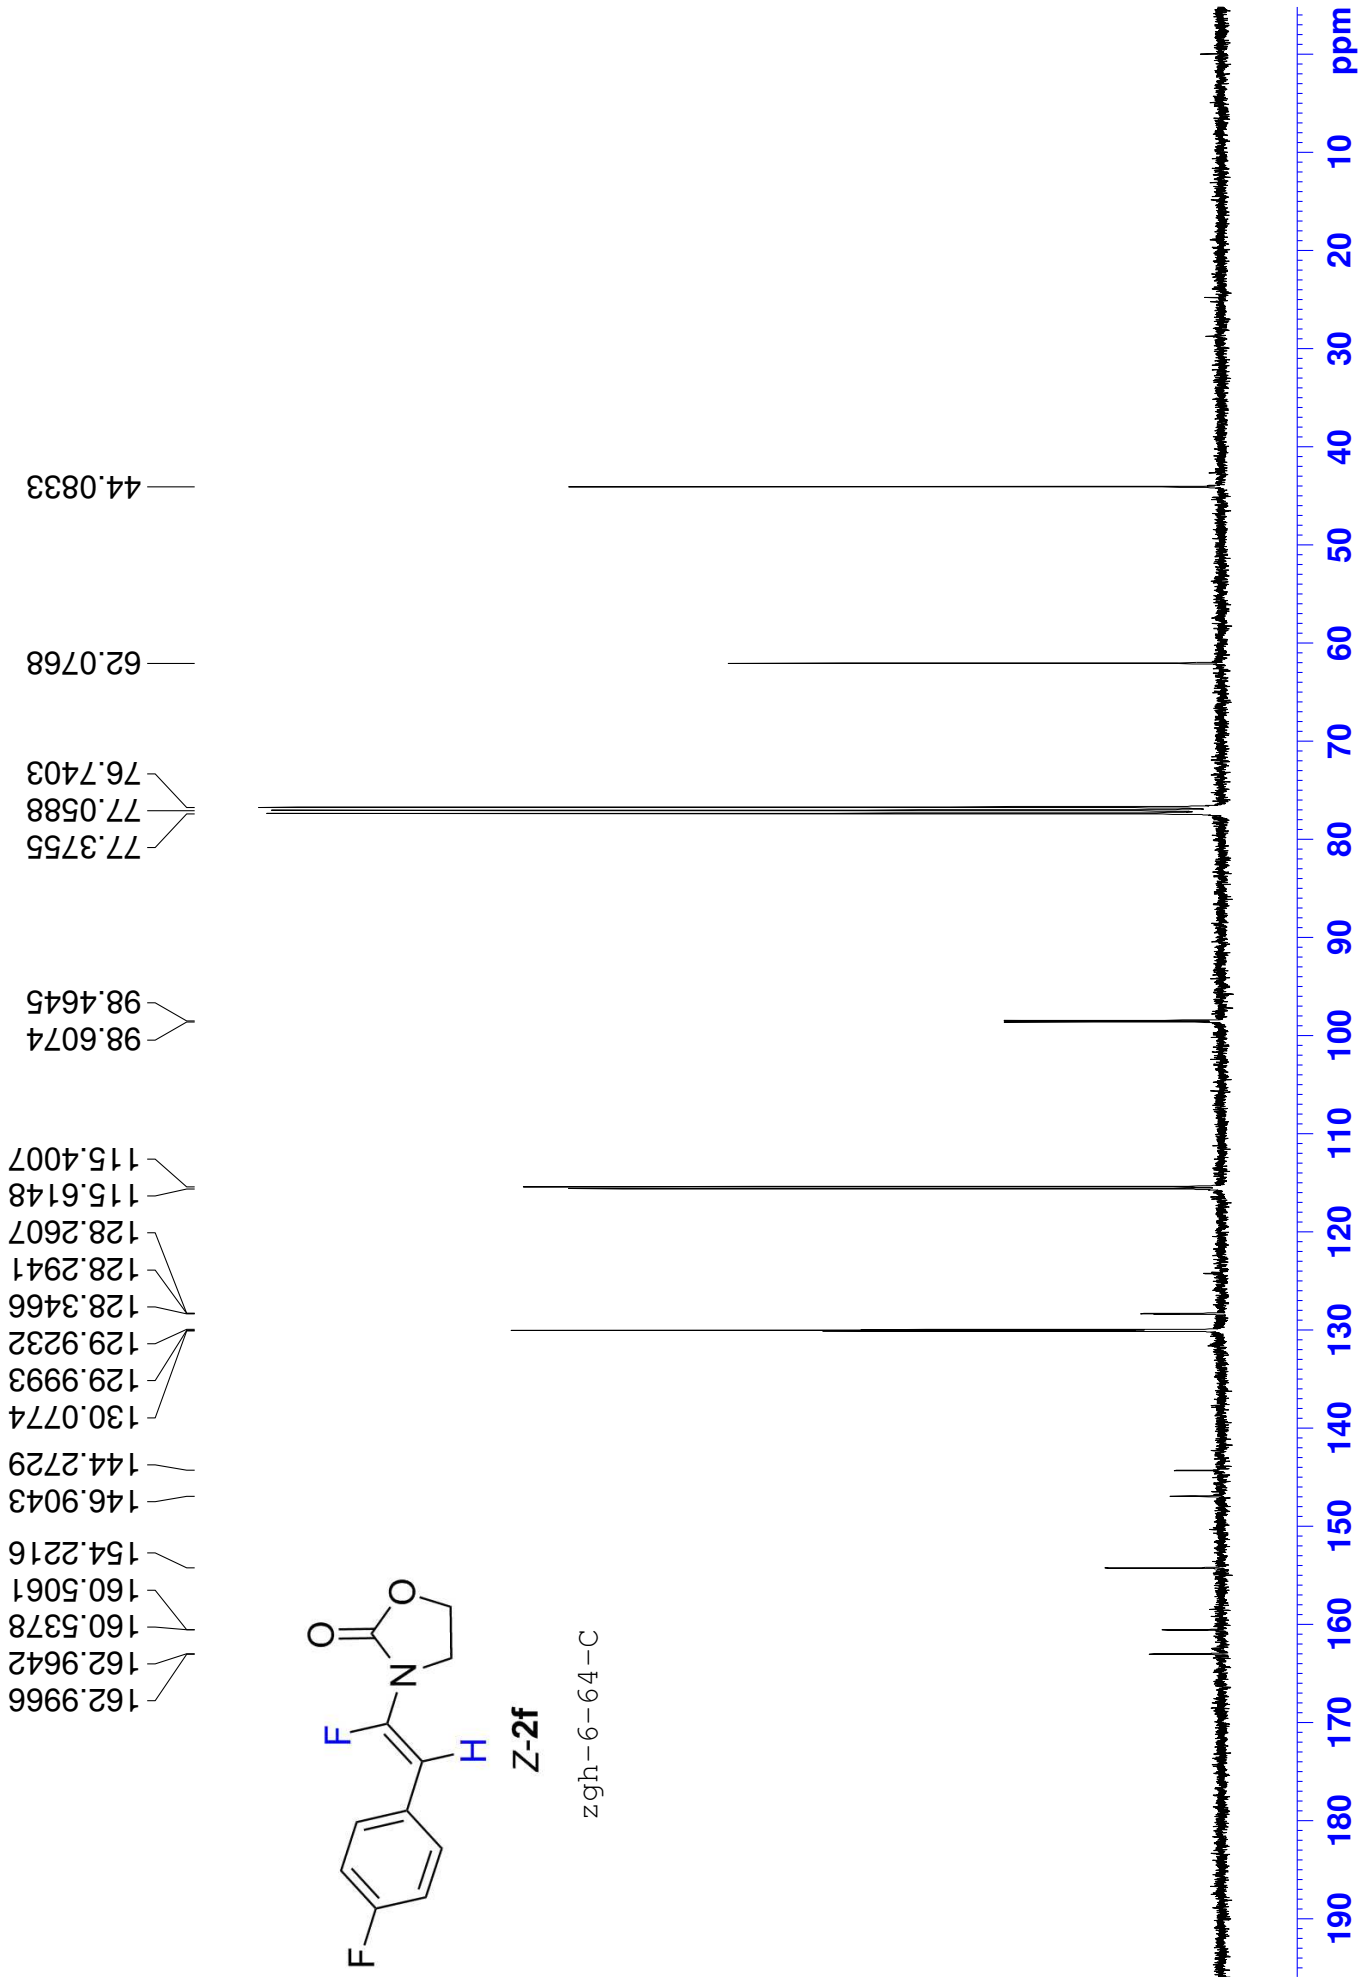

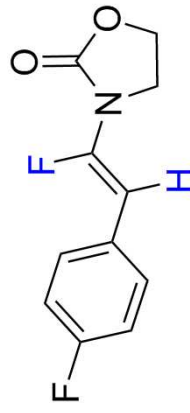

**Z-2f**

zgh-6-64-F

— -100.4135

— -114.1784

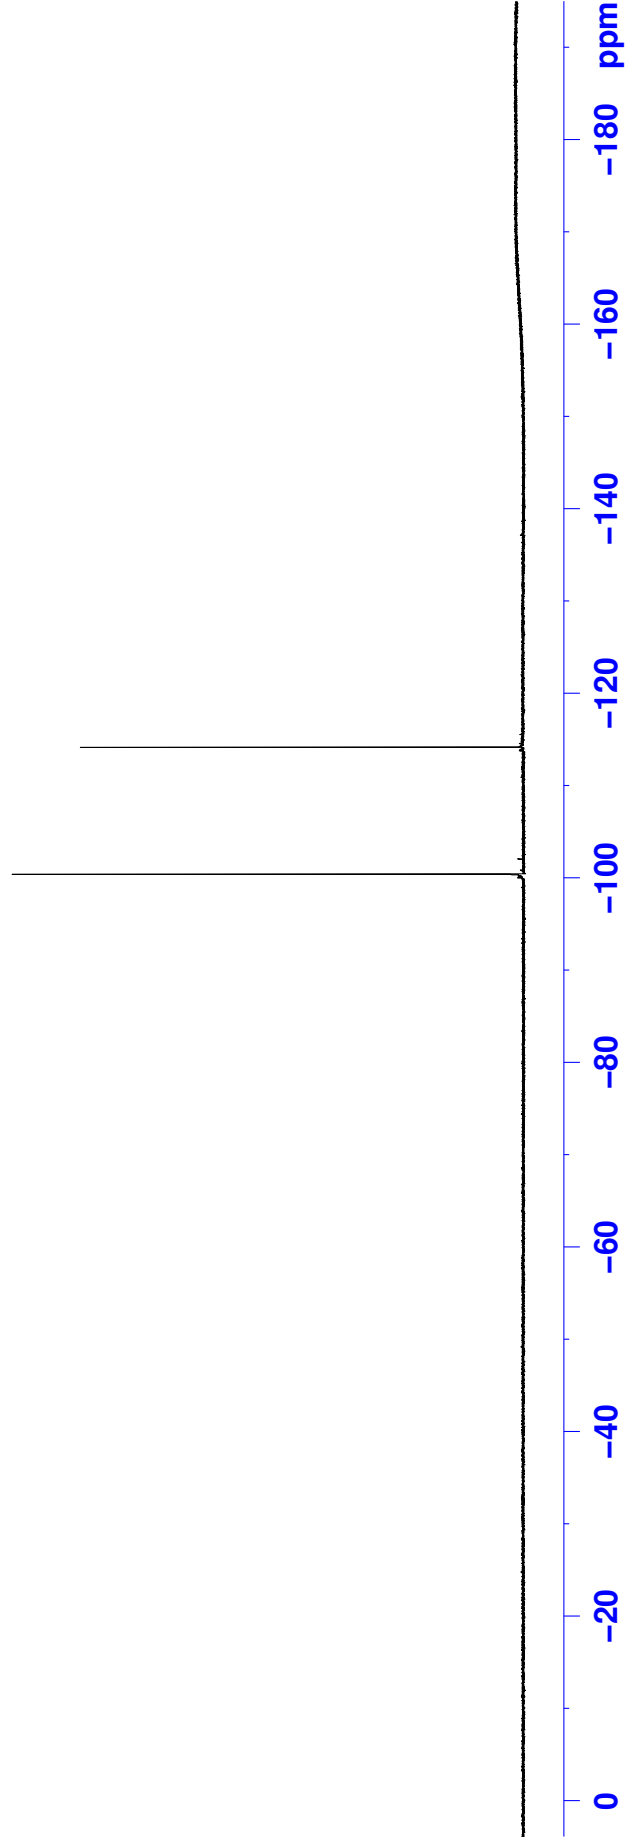

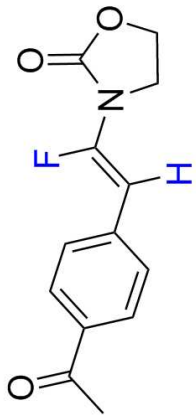

**Z-2g**

zgh-2-180-H

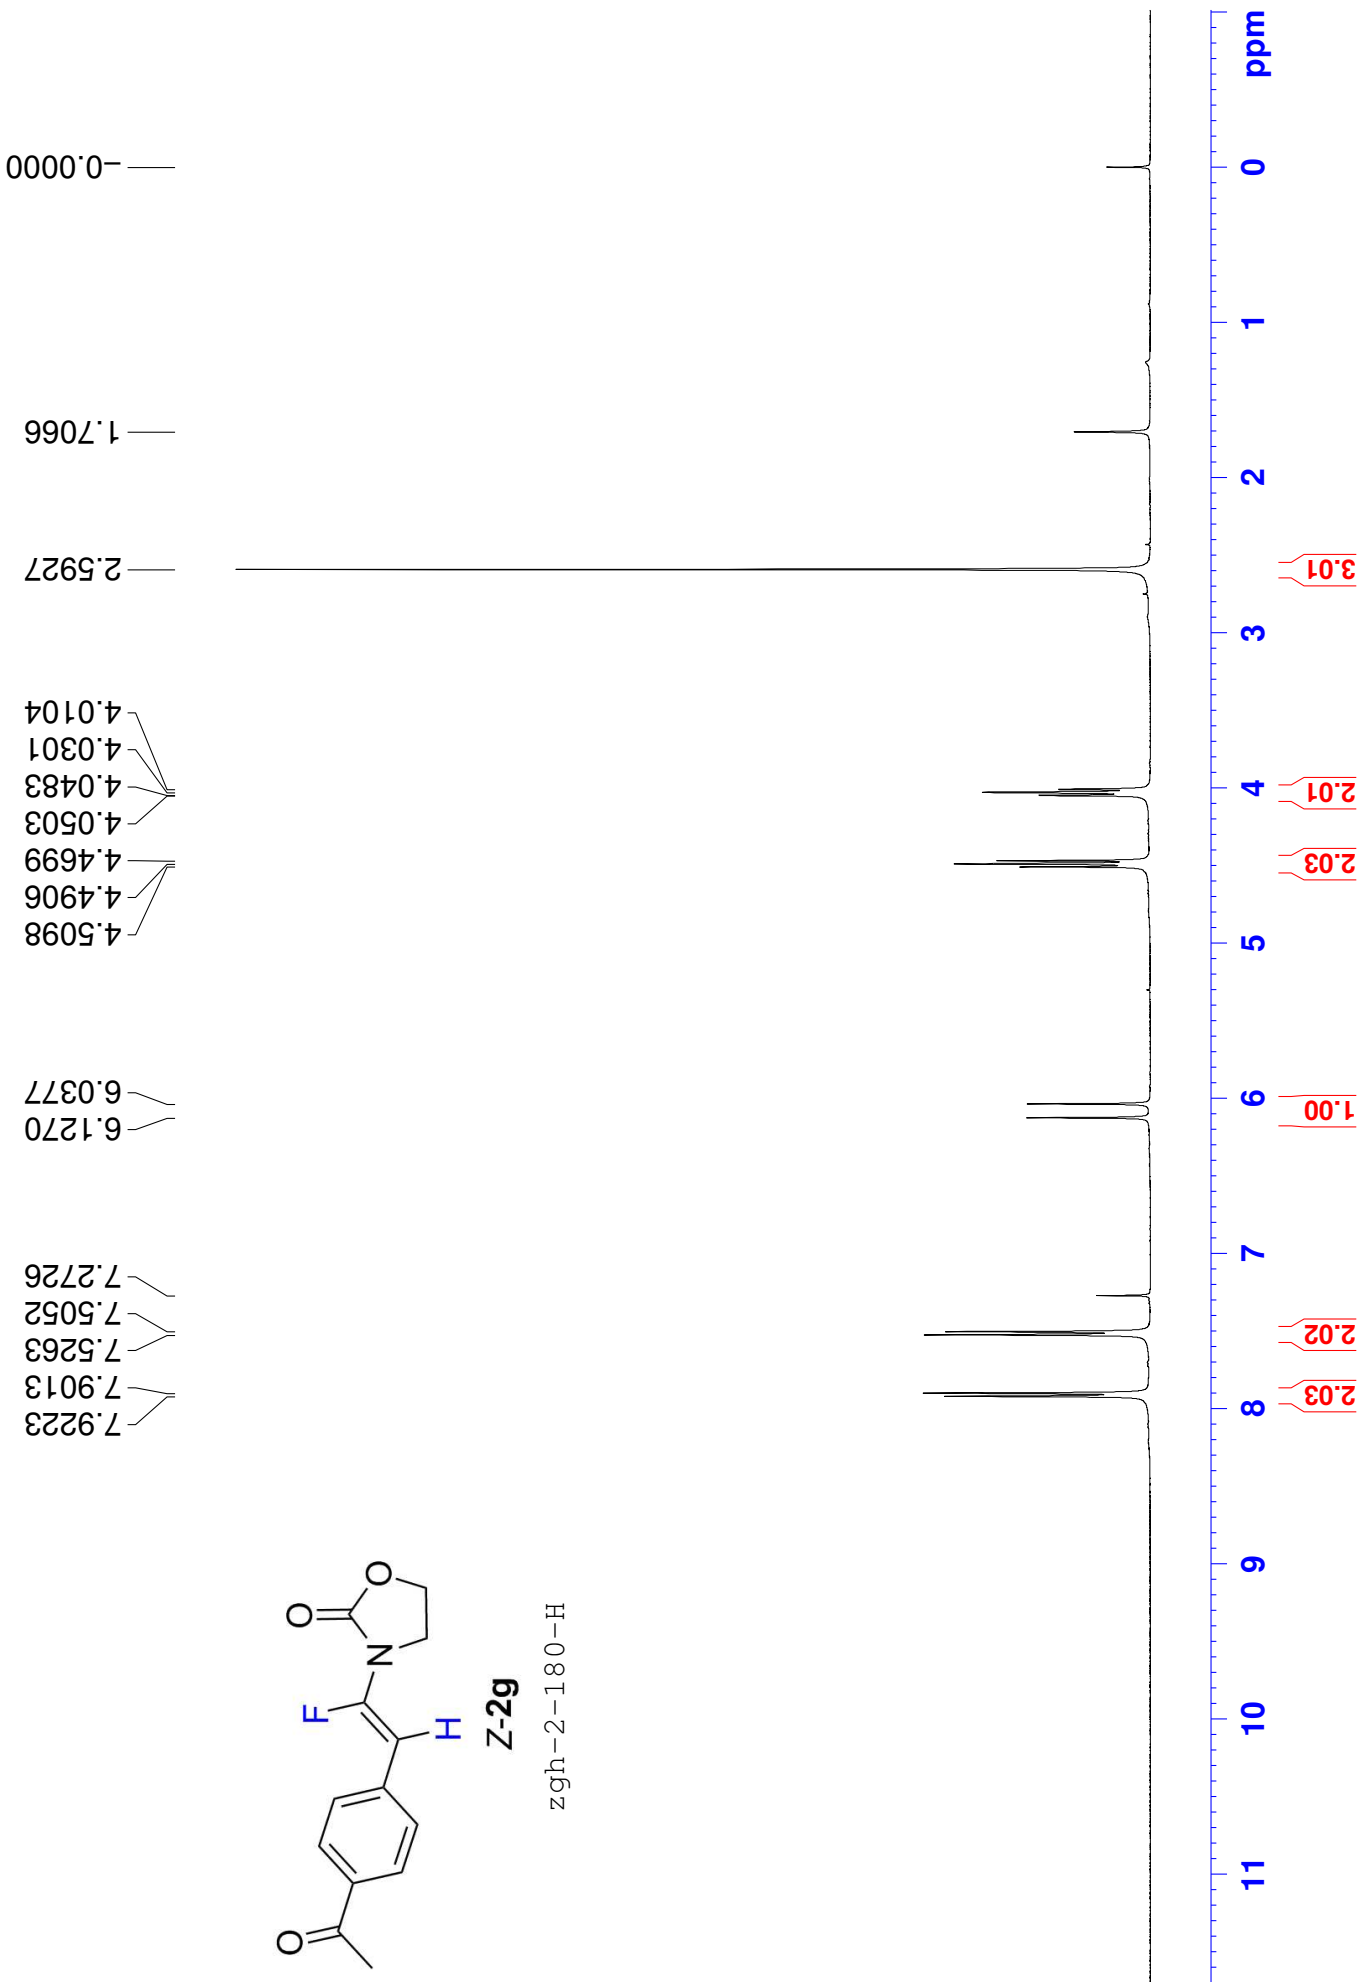

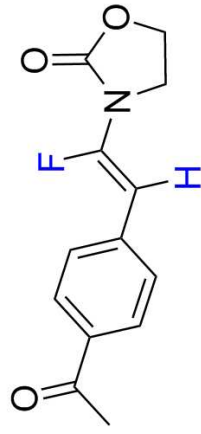

**Z-2g**

zgh-2-180-C

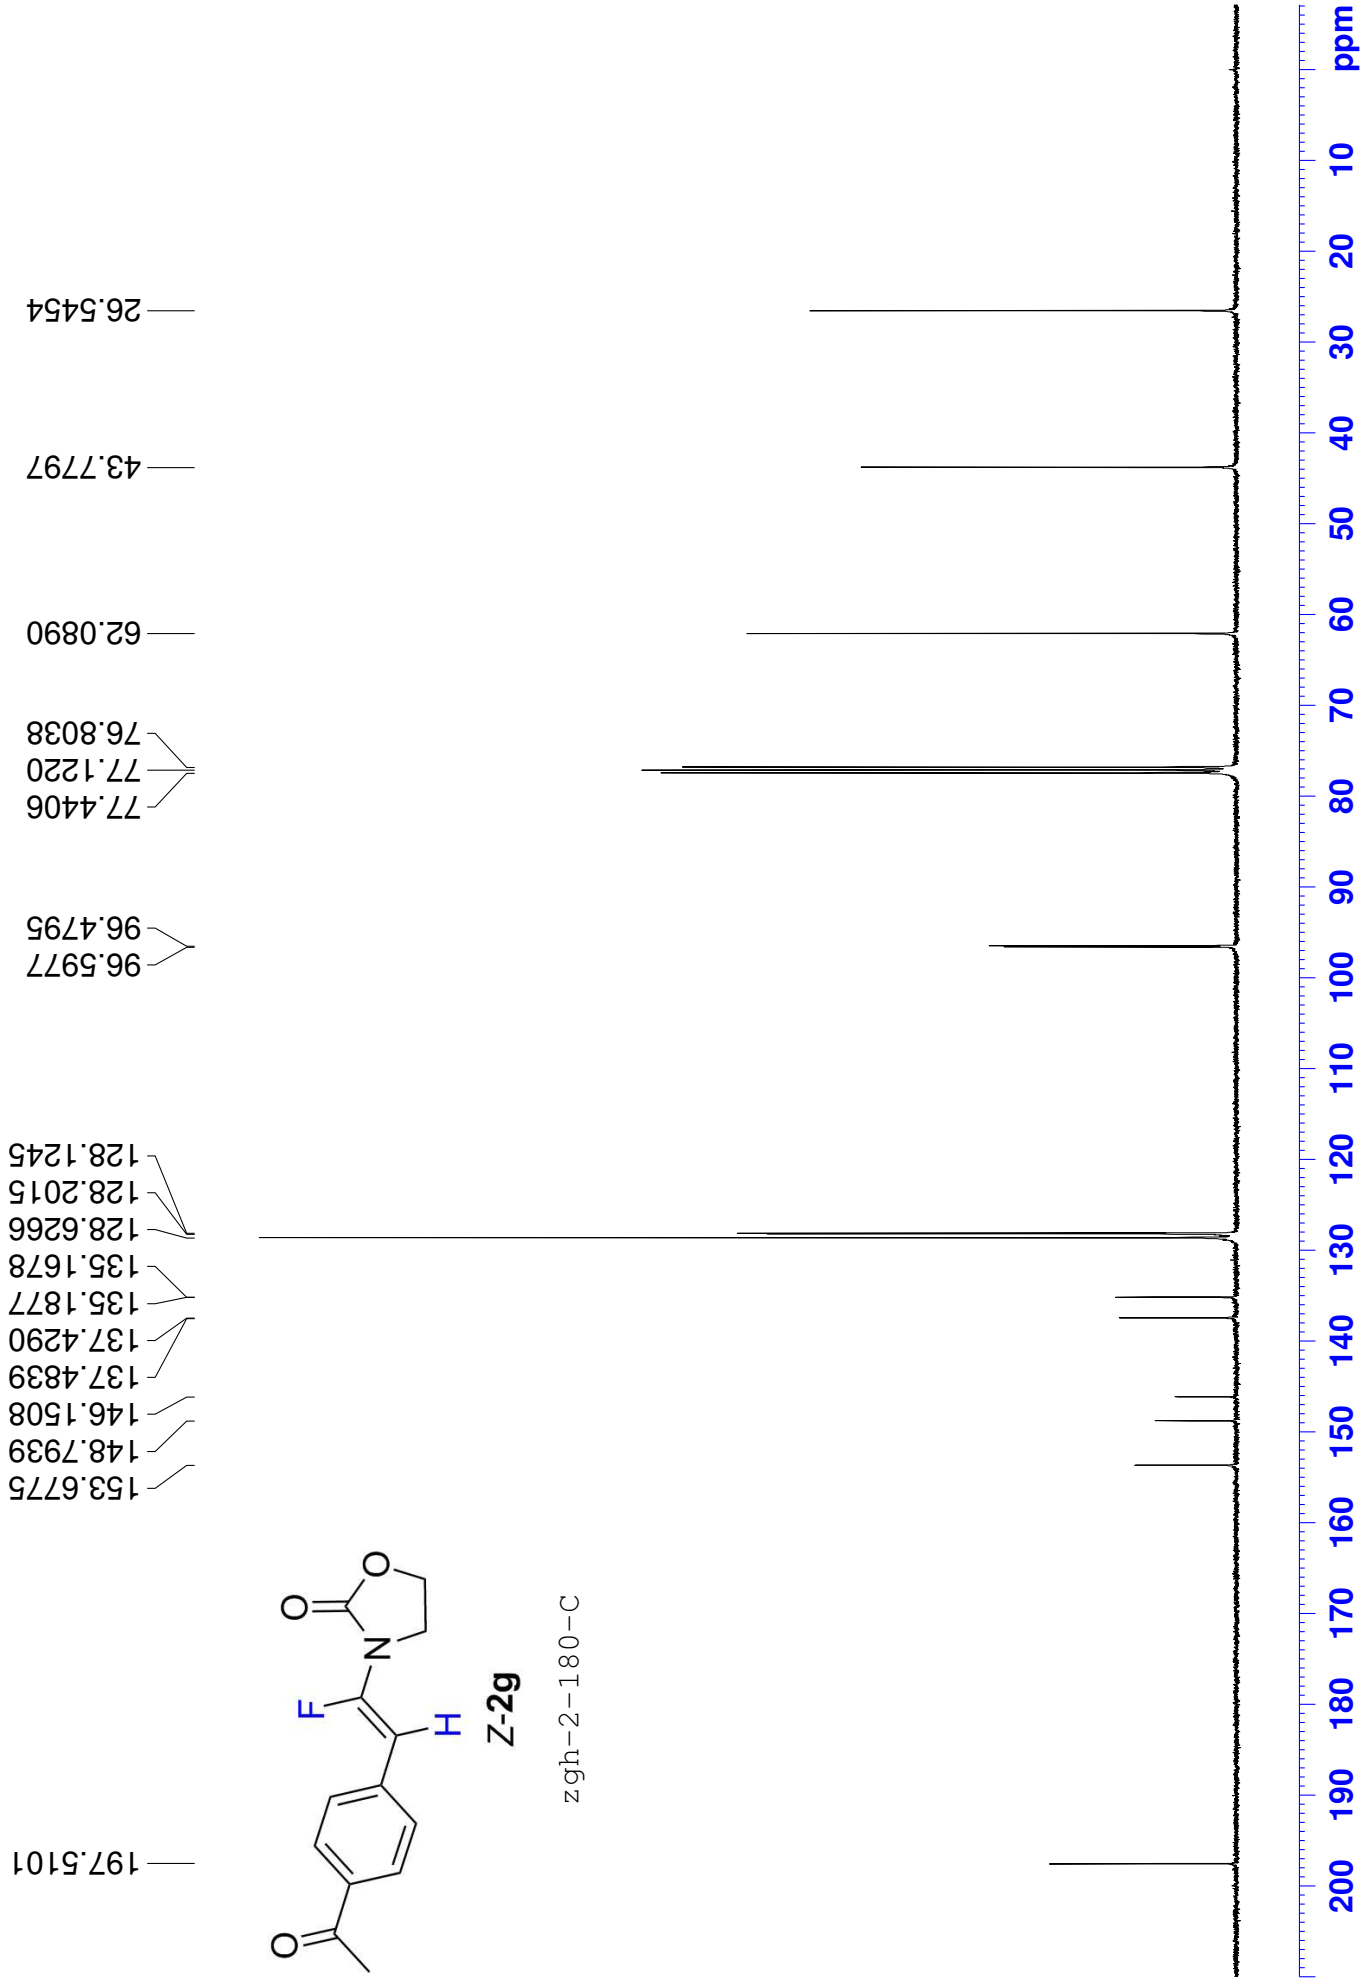

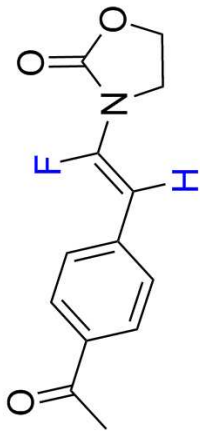

**Z-2g**

zgh-2-180-F

—96.7446

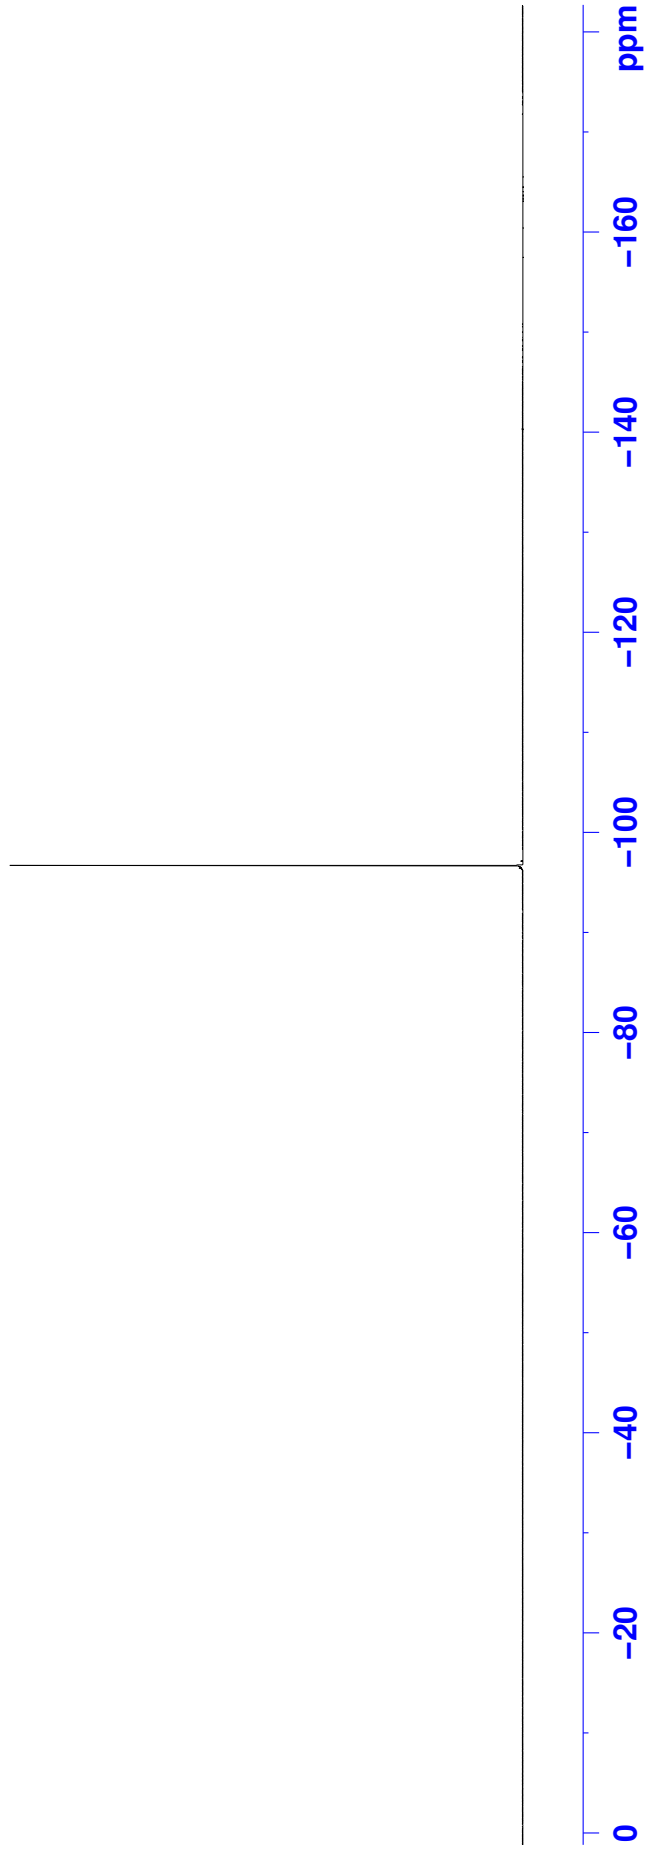

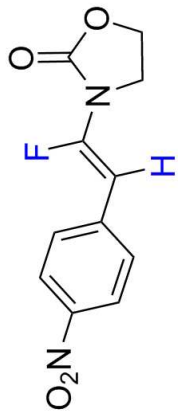

Z-2h

zgh-2-164-H

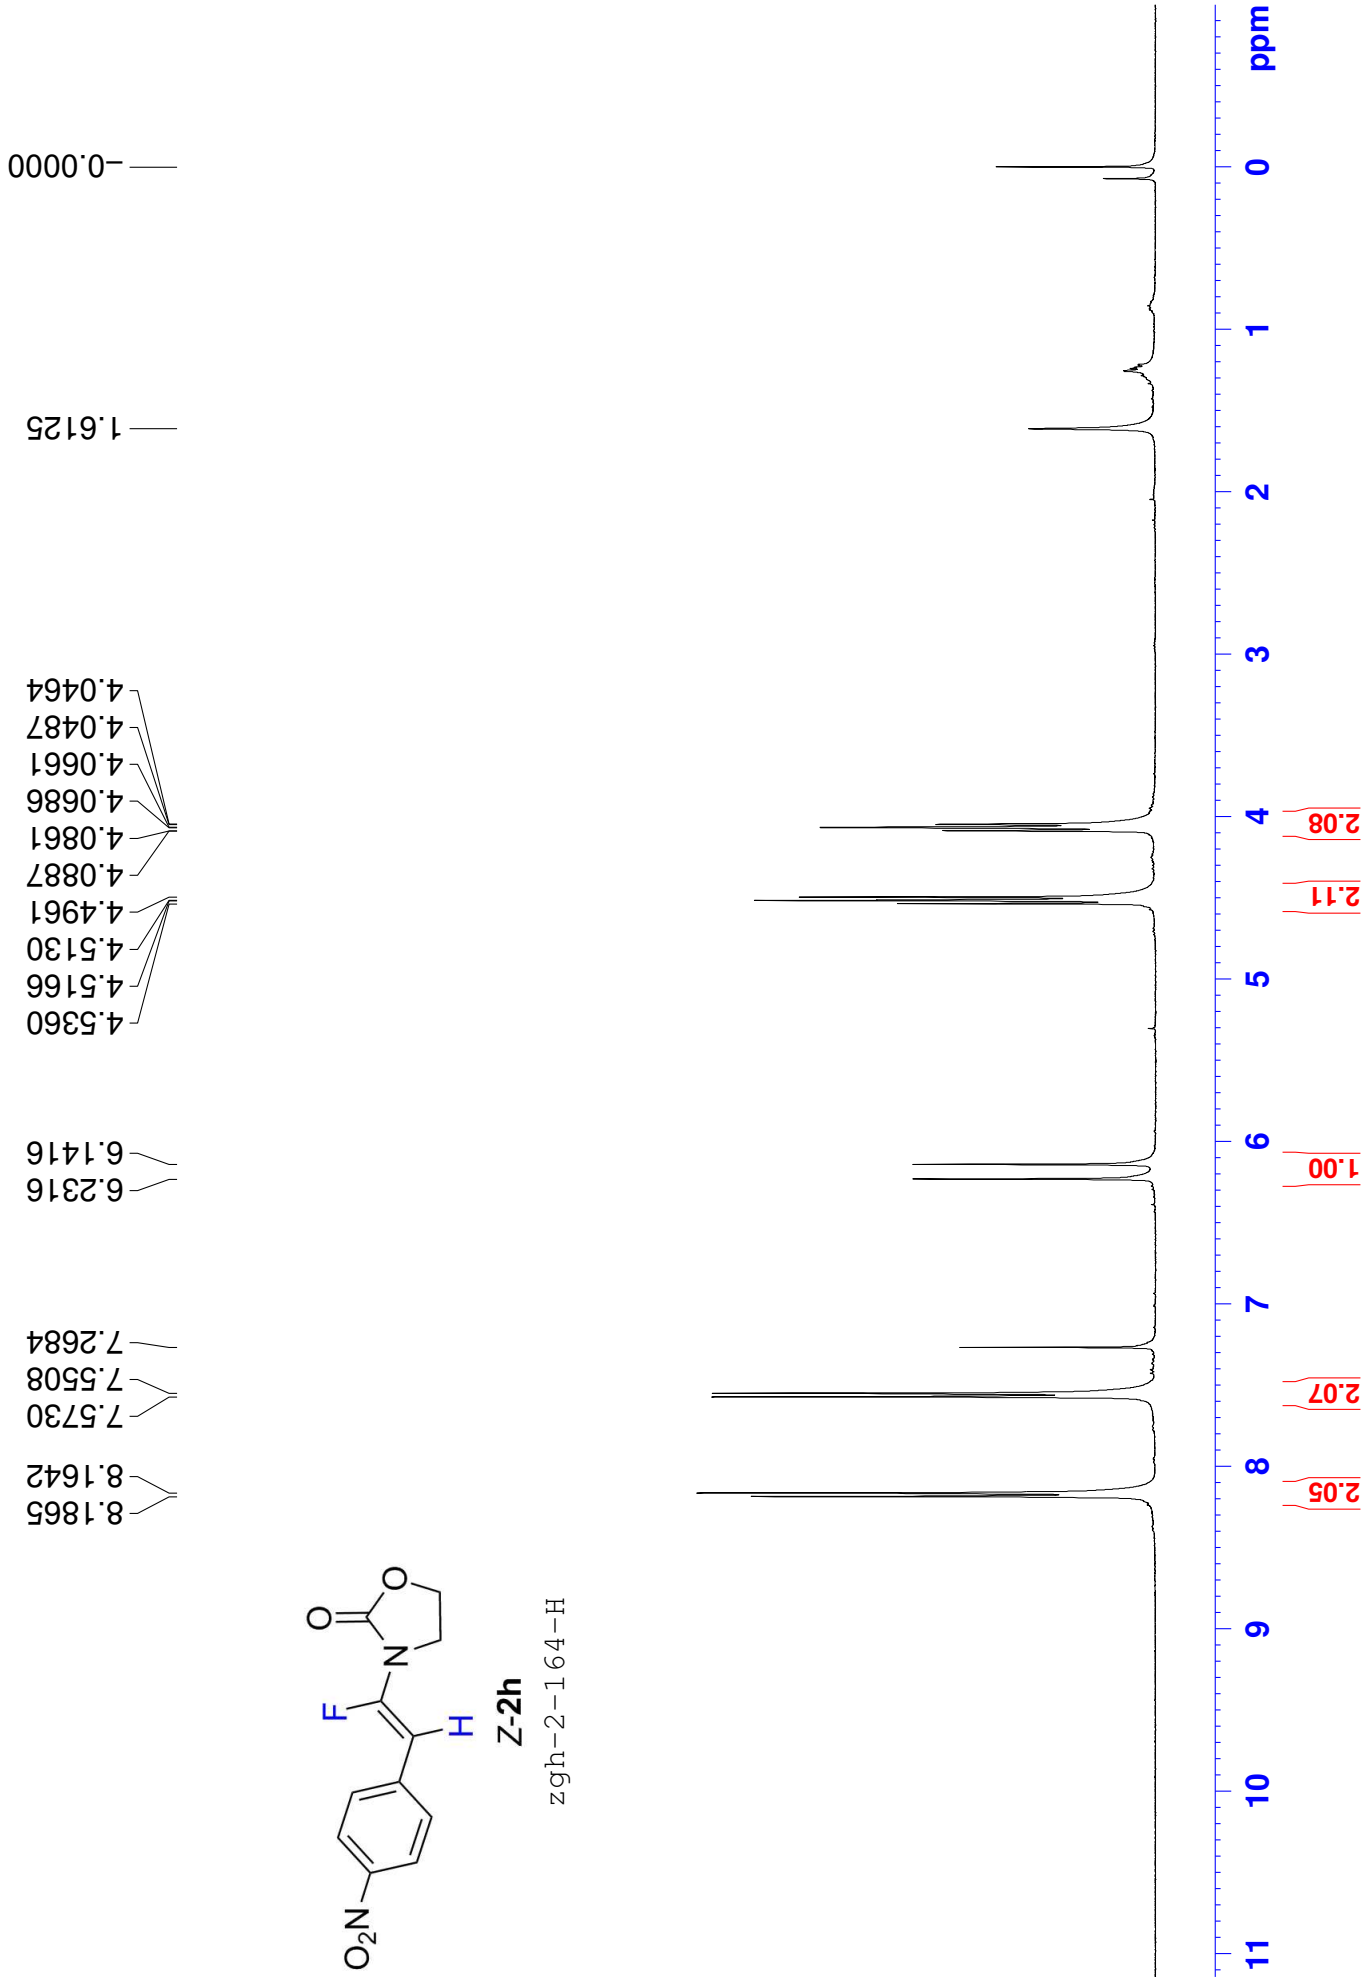



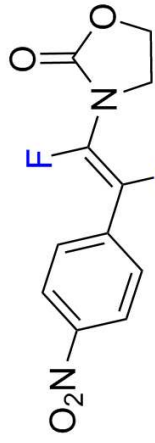

Z-2h

zqh-2-164-C

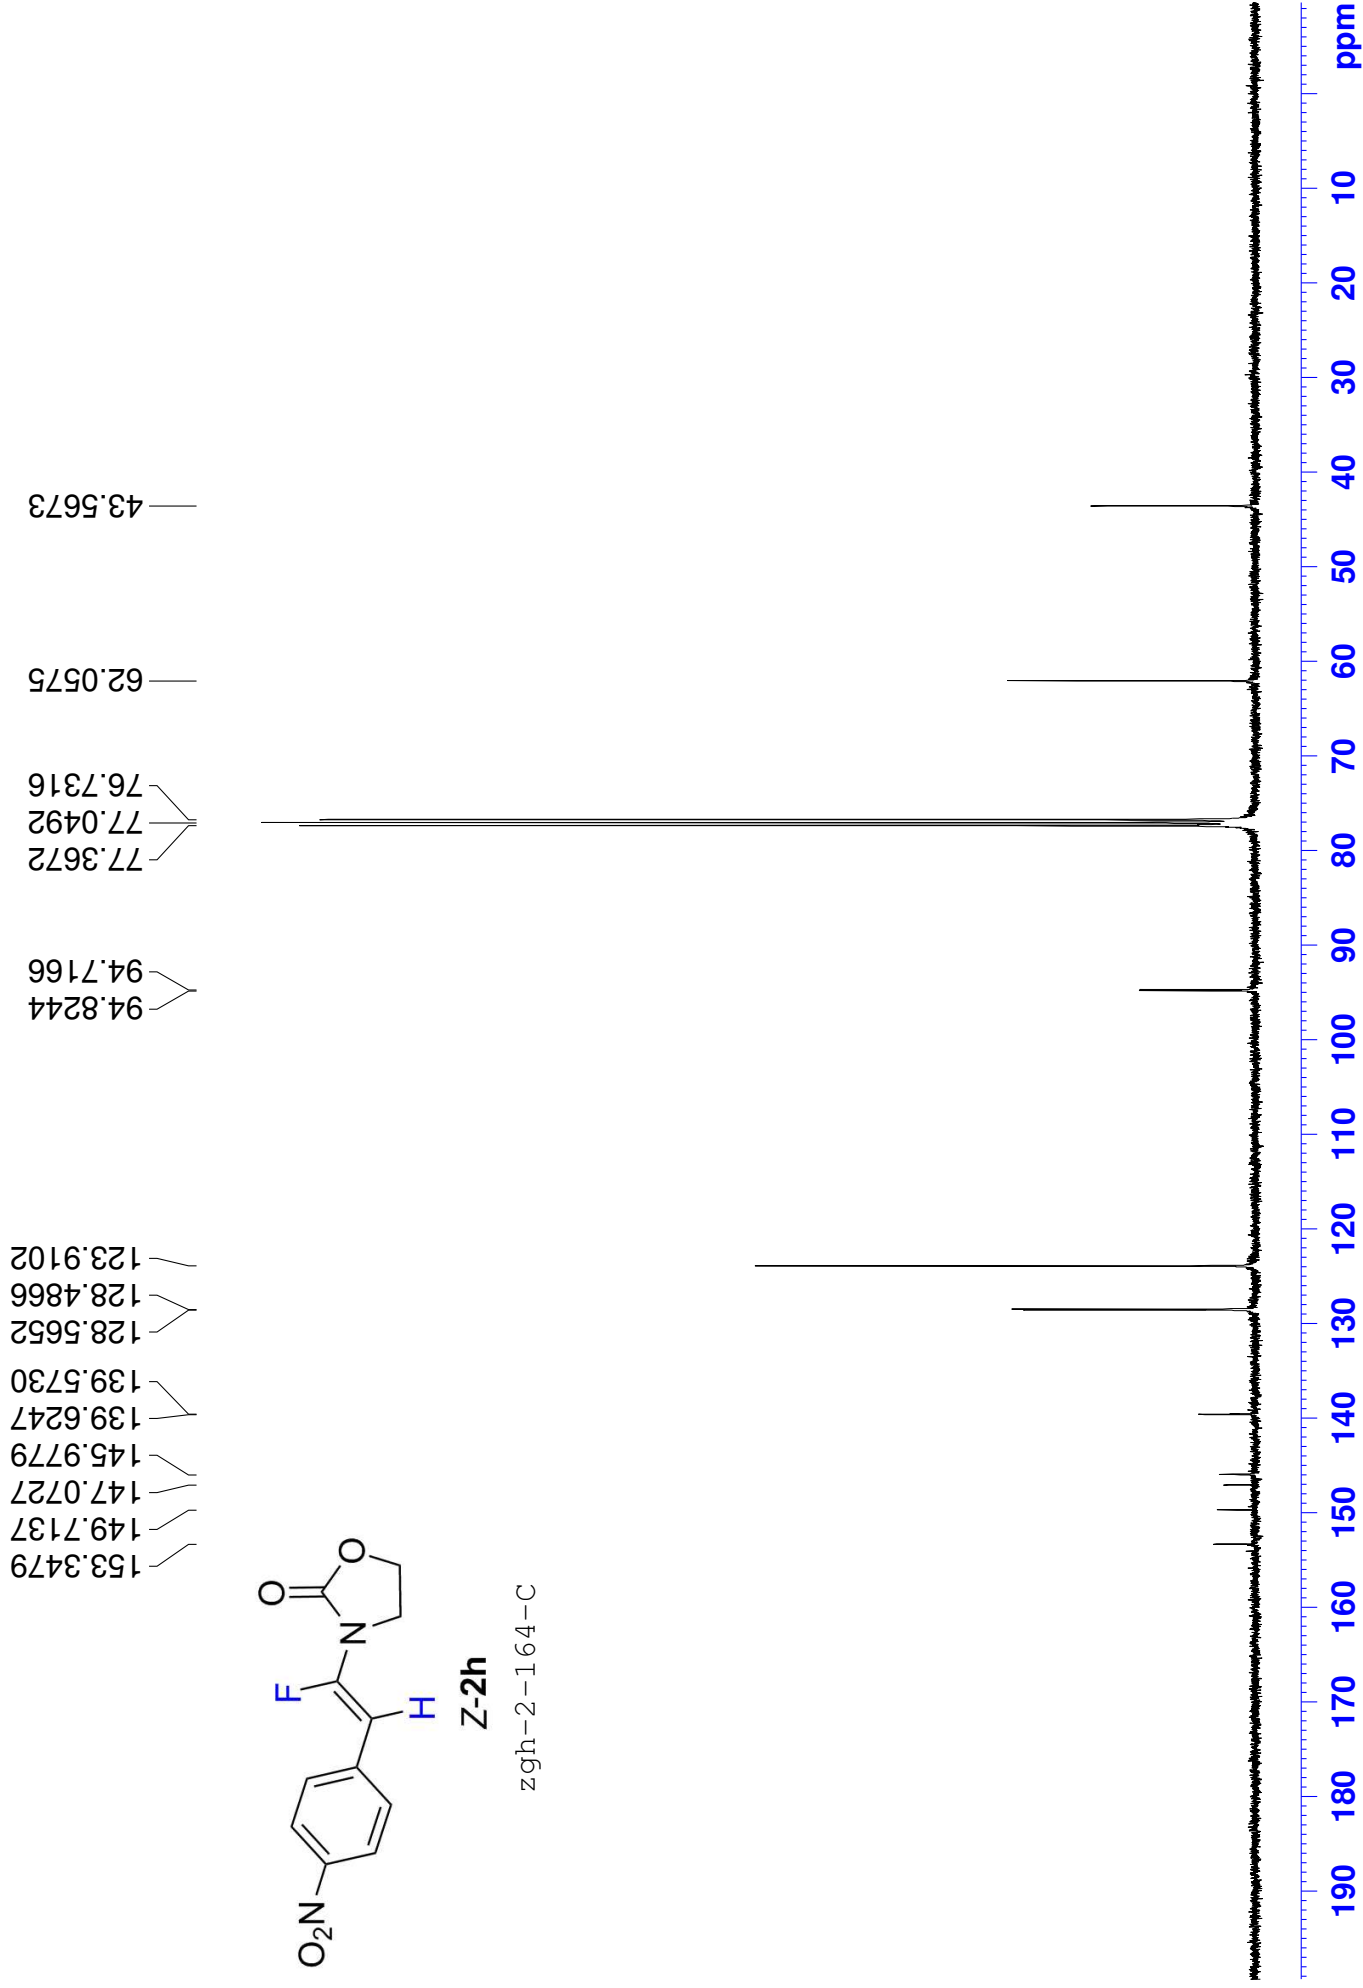

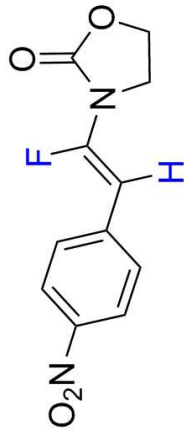

**Z-2h**

zgh-2-164-F

—95.5354

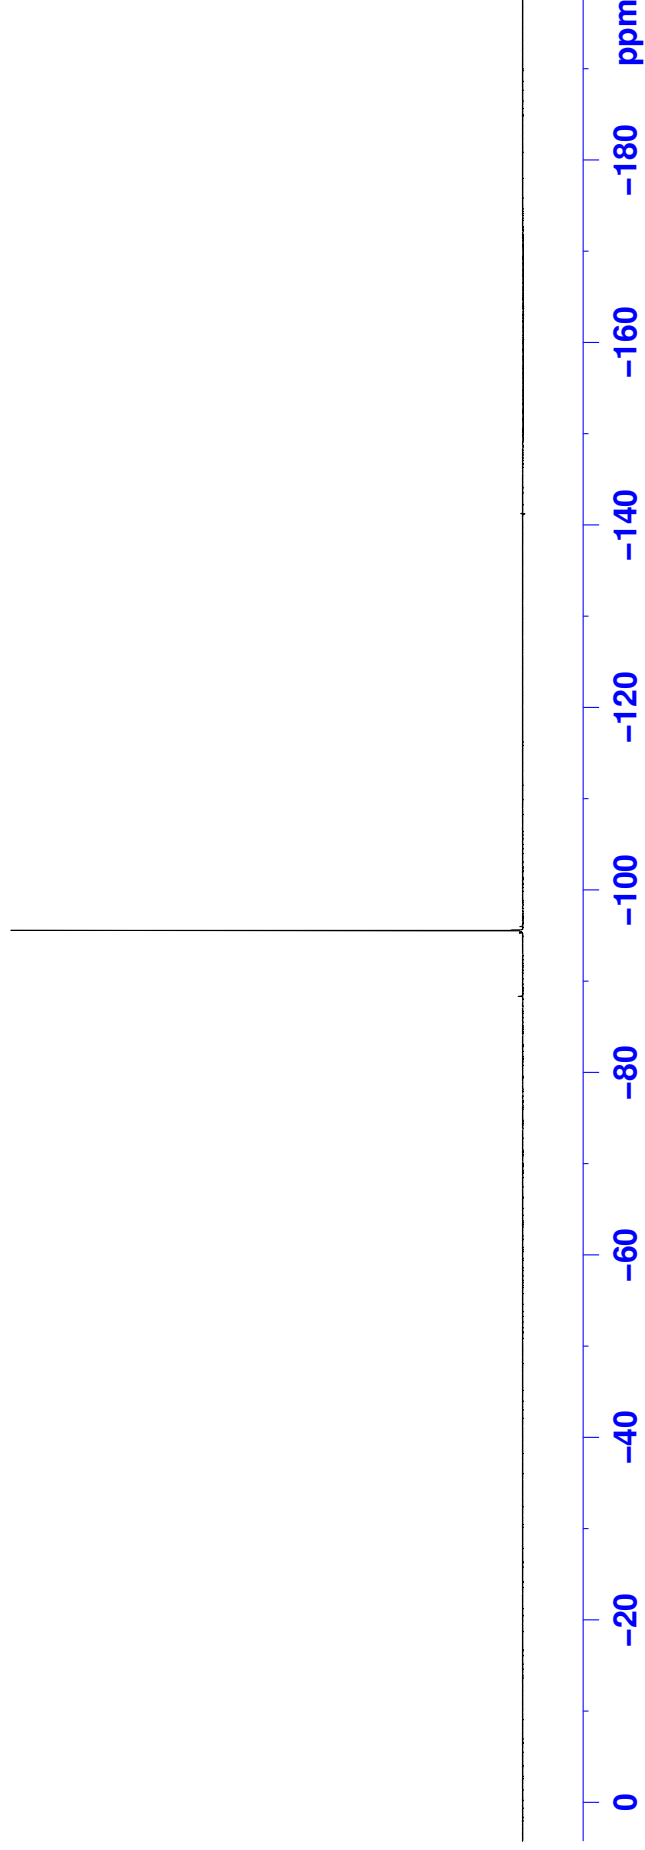

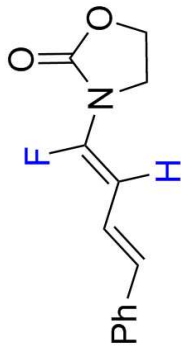

Z-2i

zgh-5-174-H

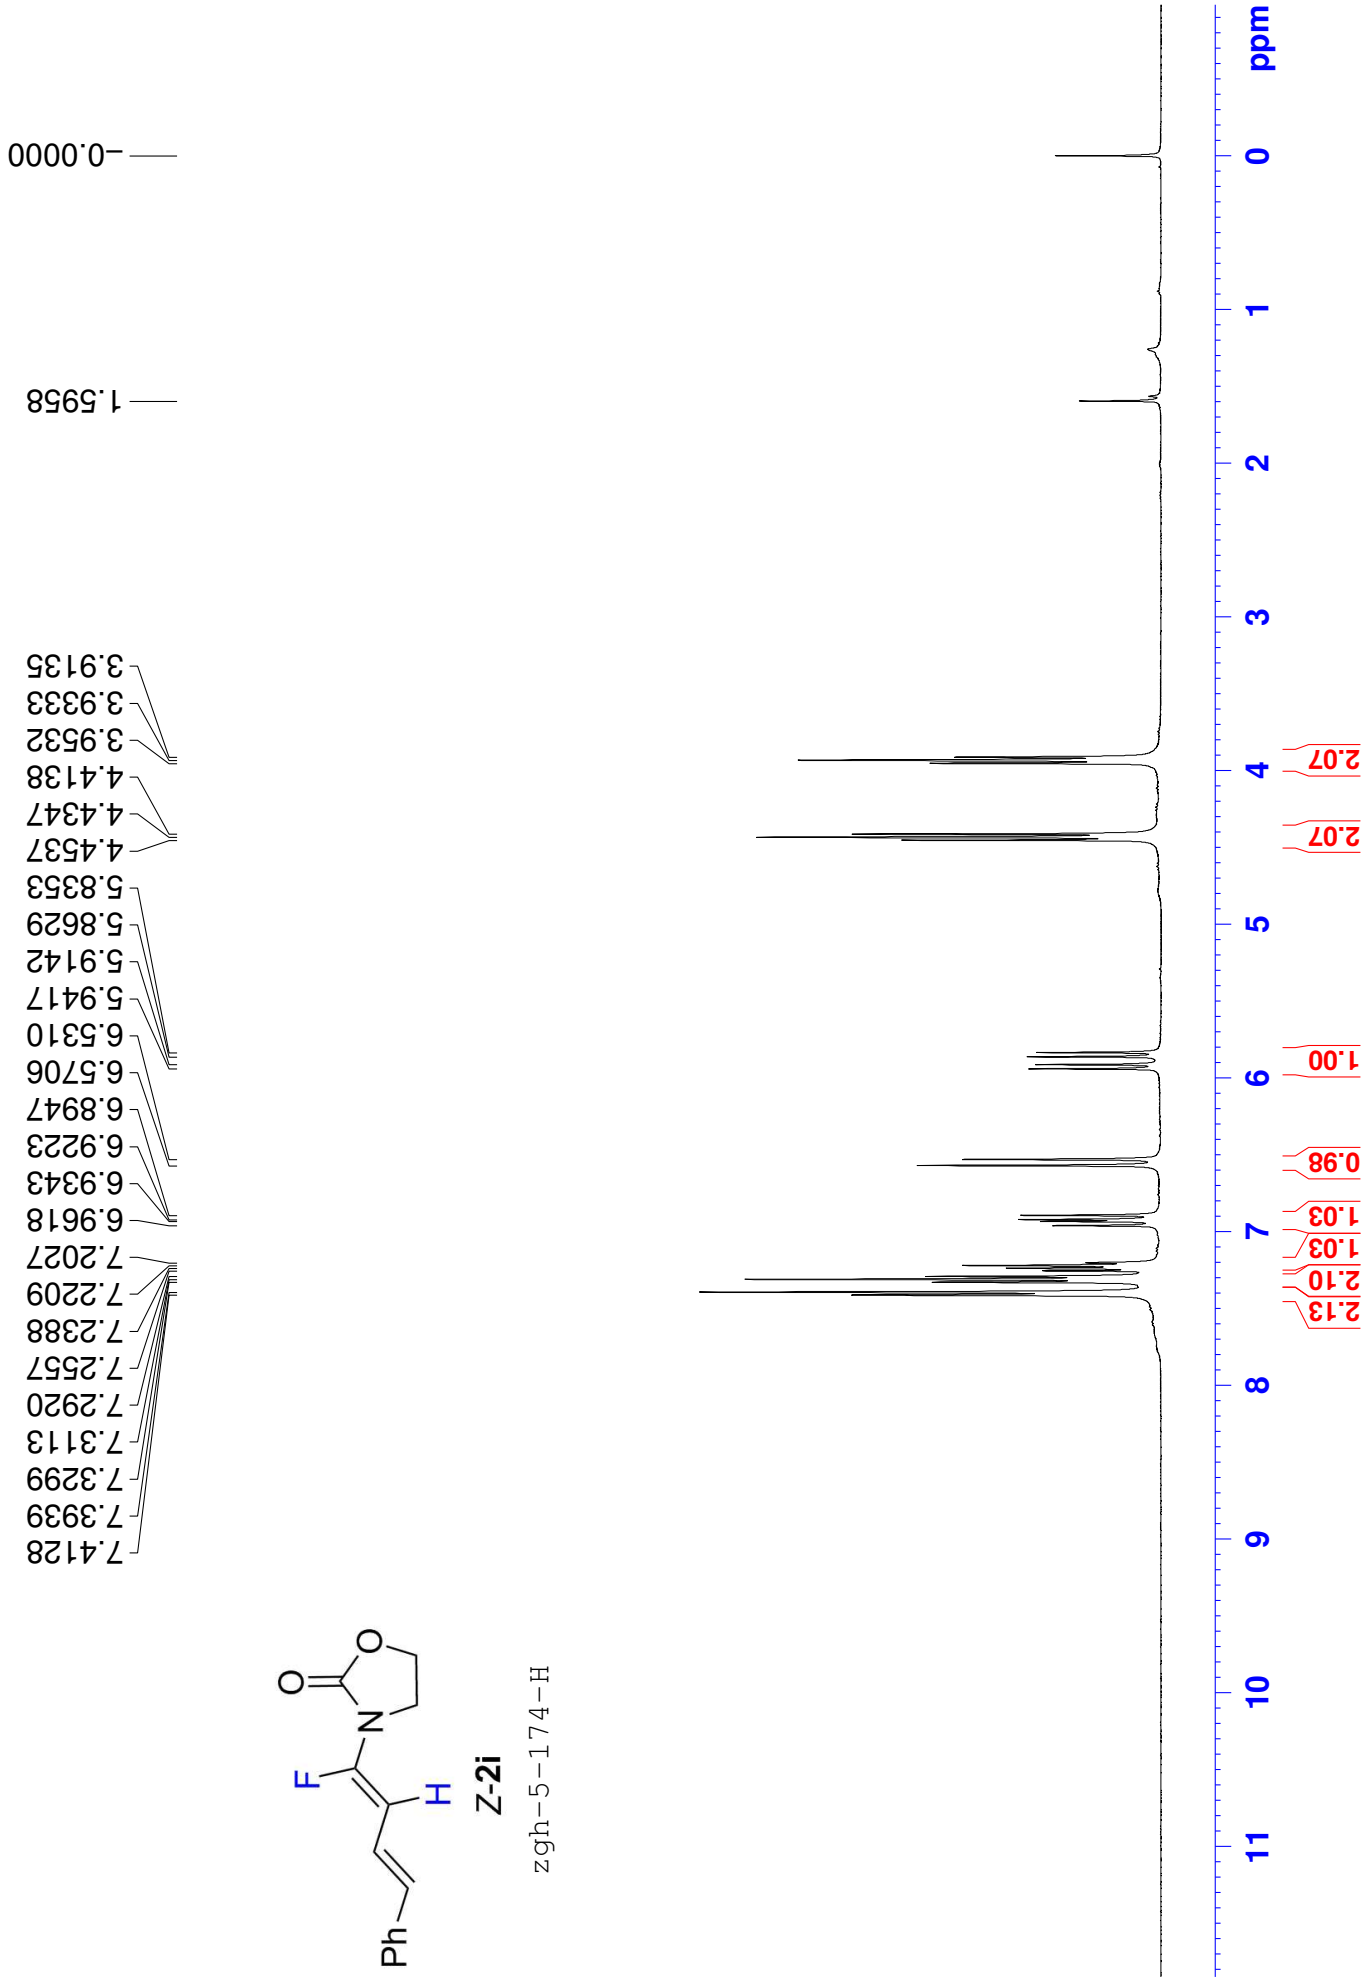

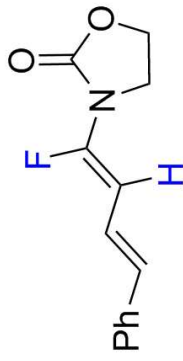

Z-2i

zgh-5-174-C

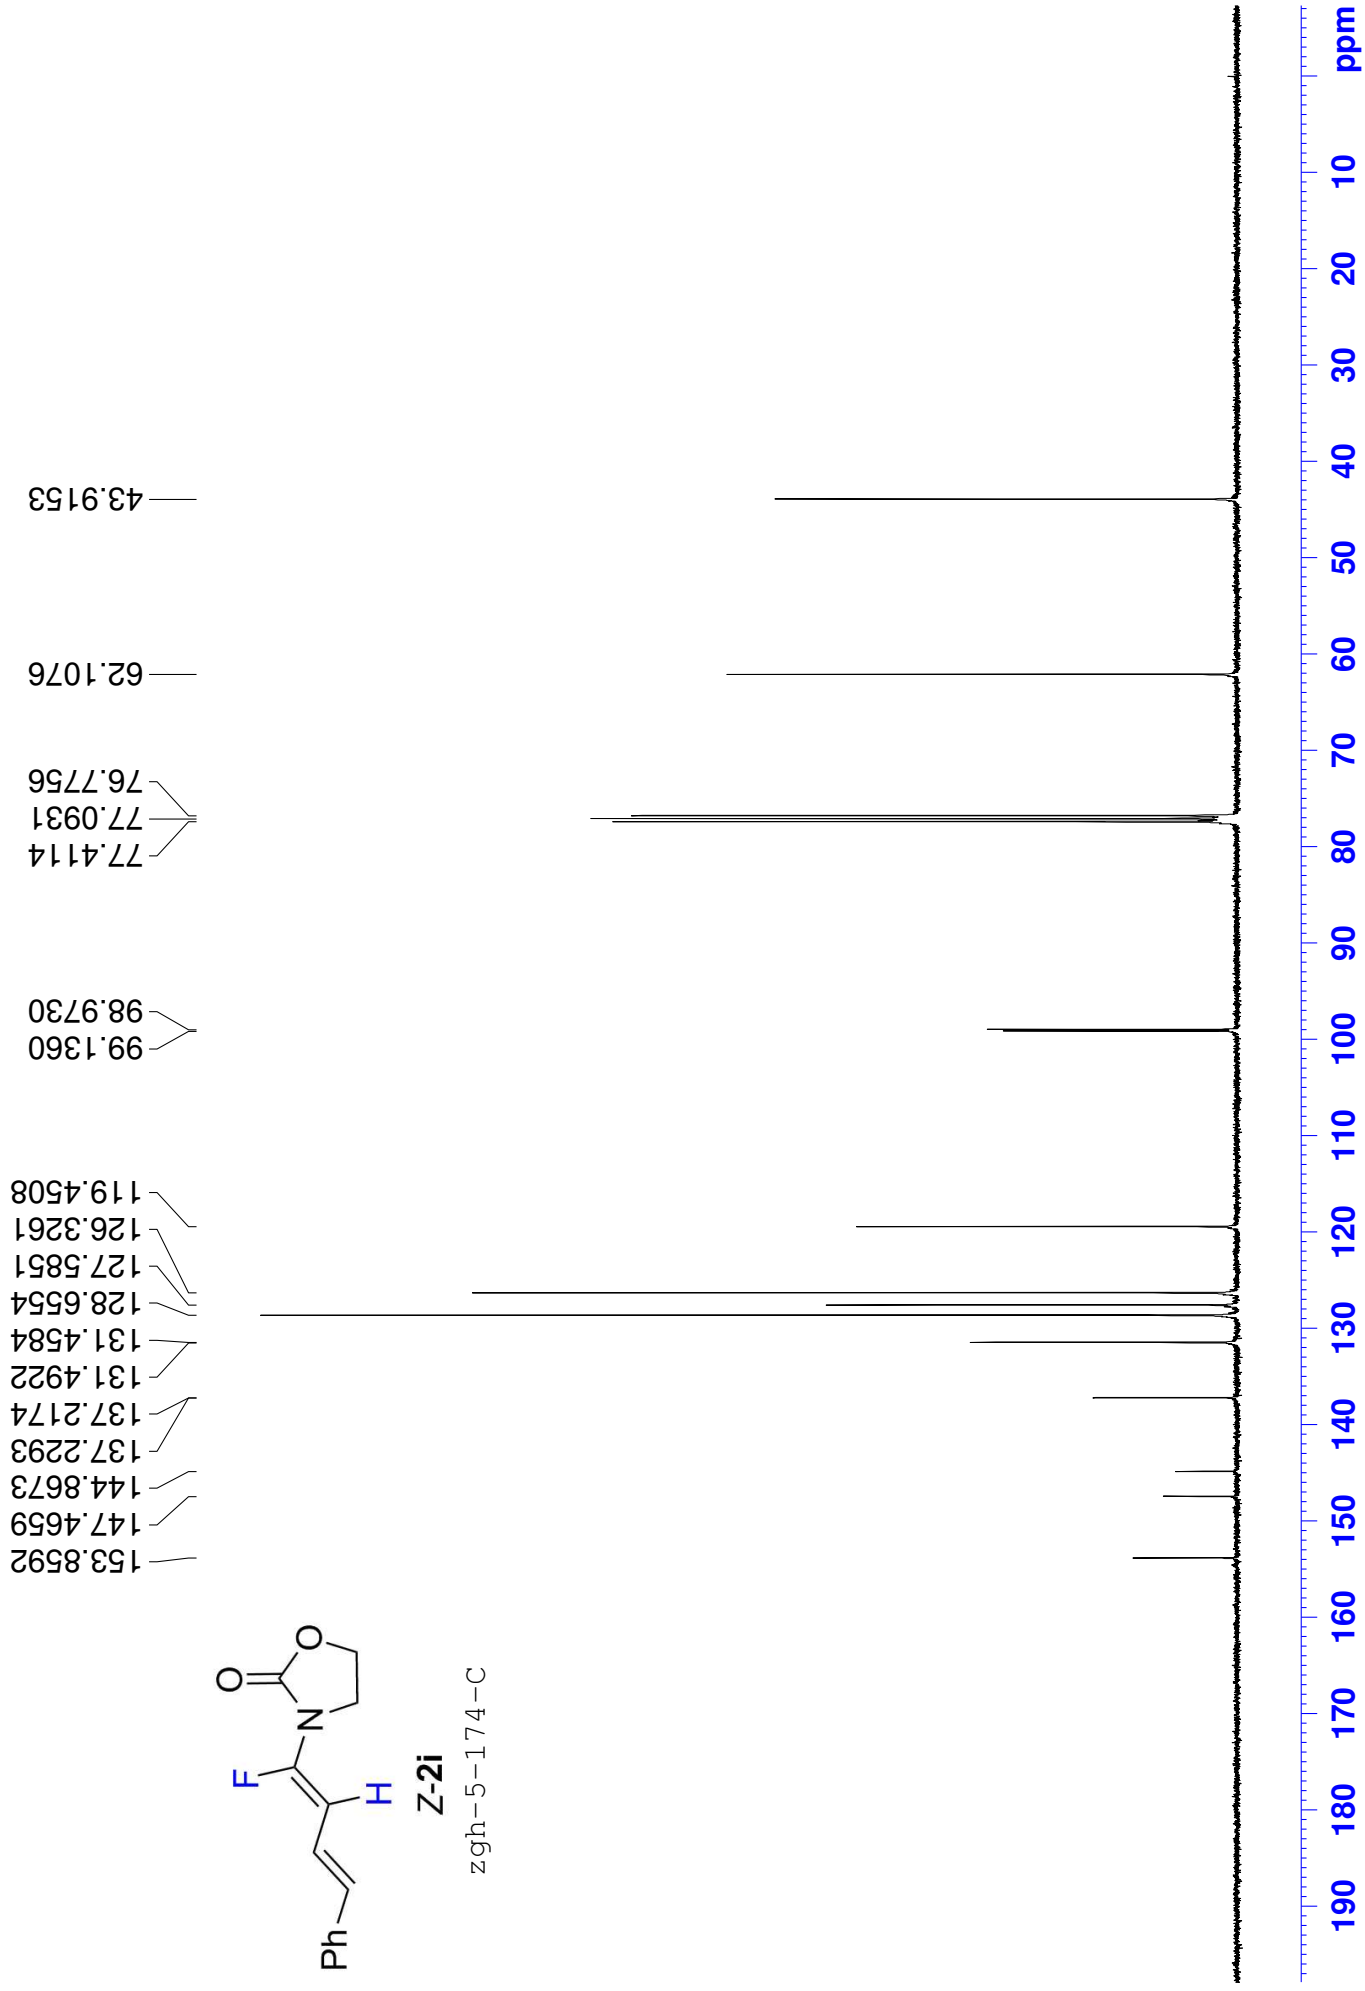

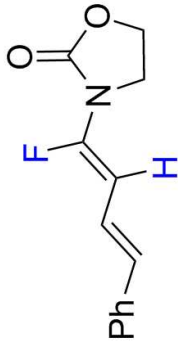

Z-2i

z gh-5-174-F

— -103.1892

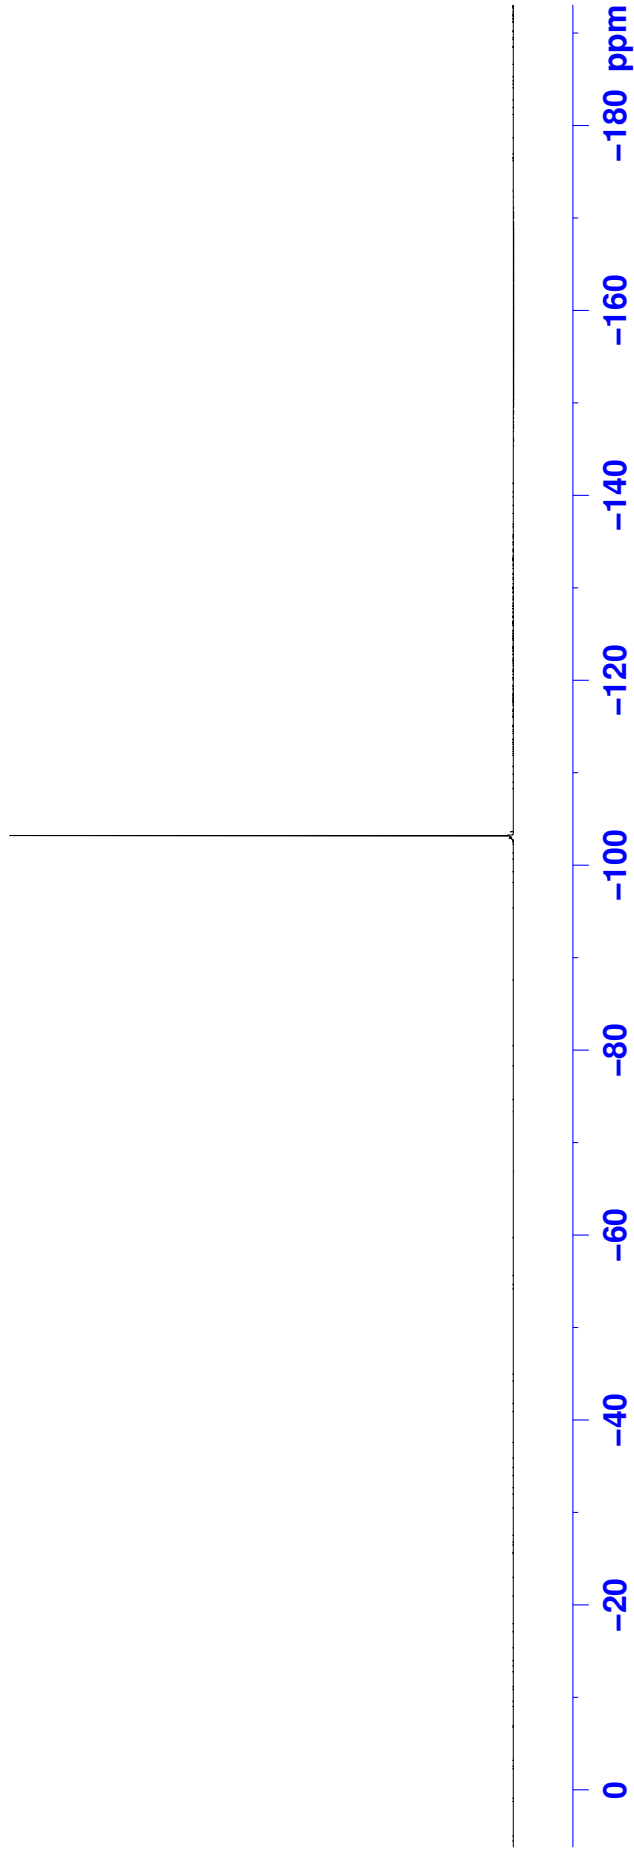

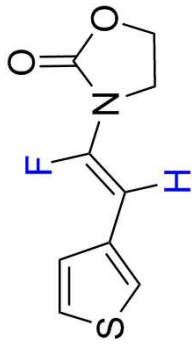

Z-2j

zgh-6-8-H

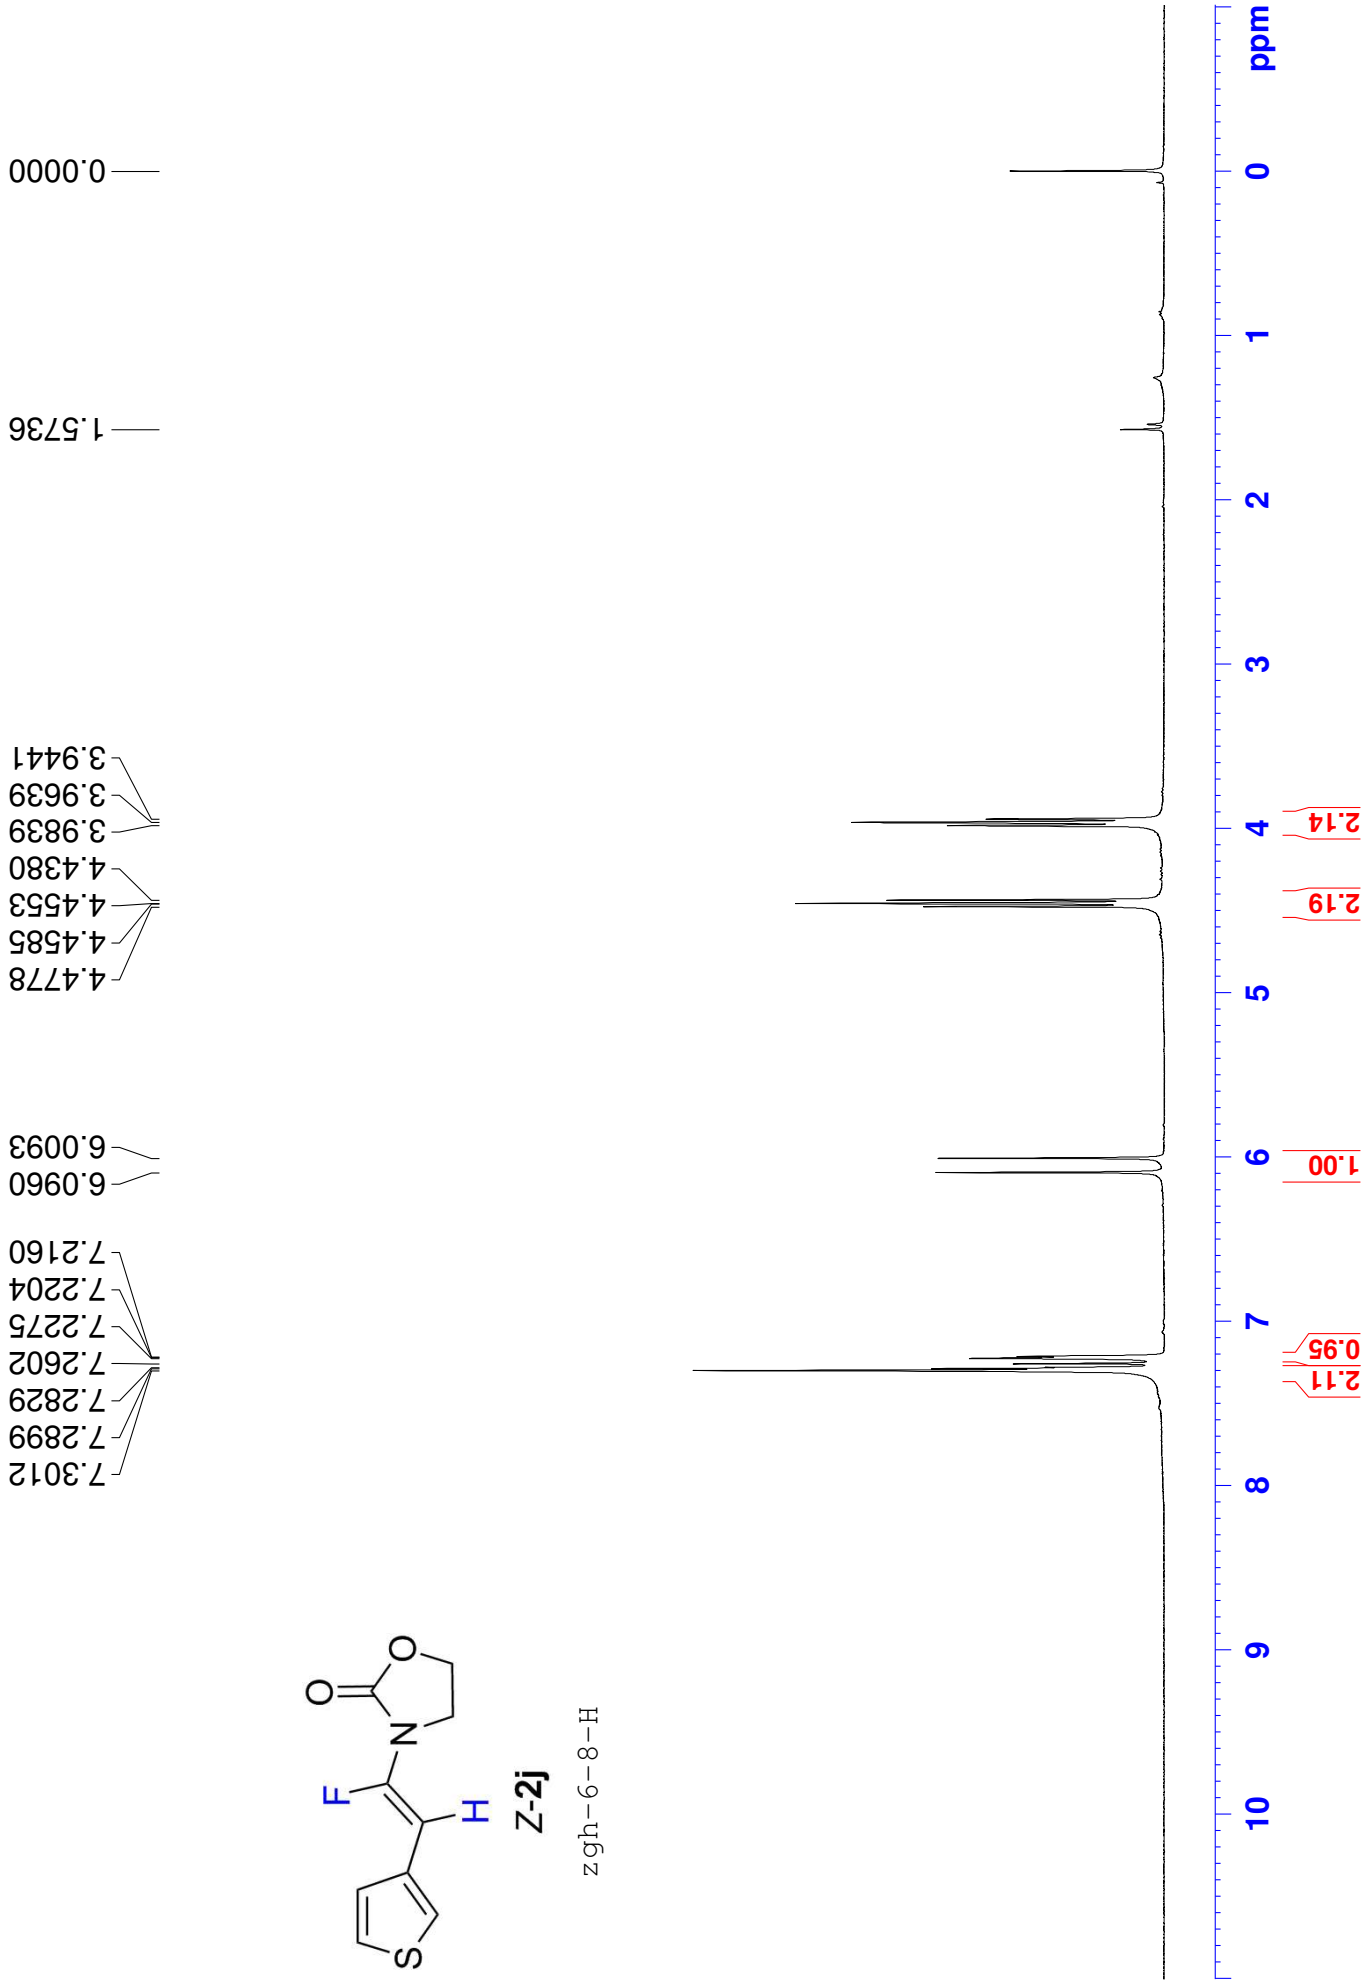

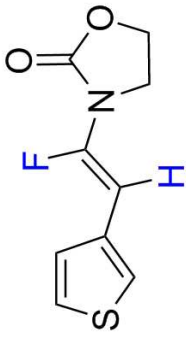

Z-2j

zgh-6-8-C

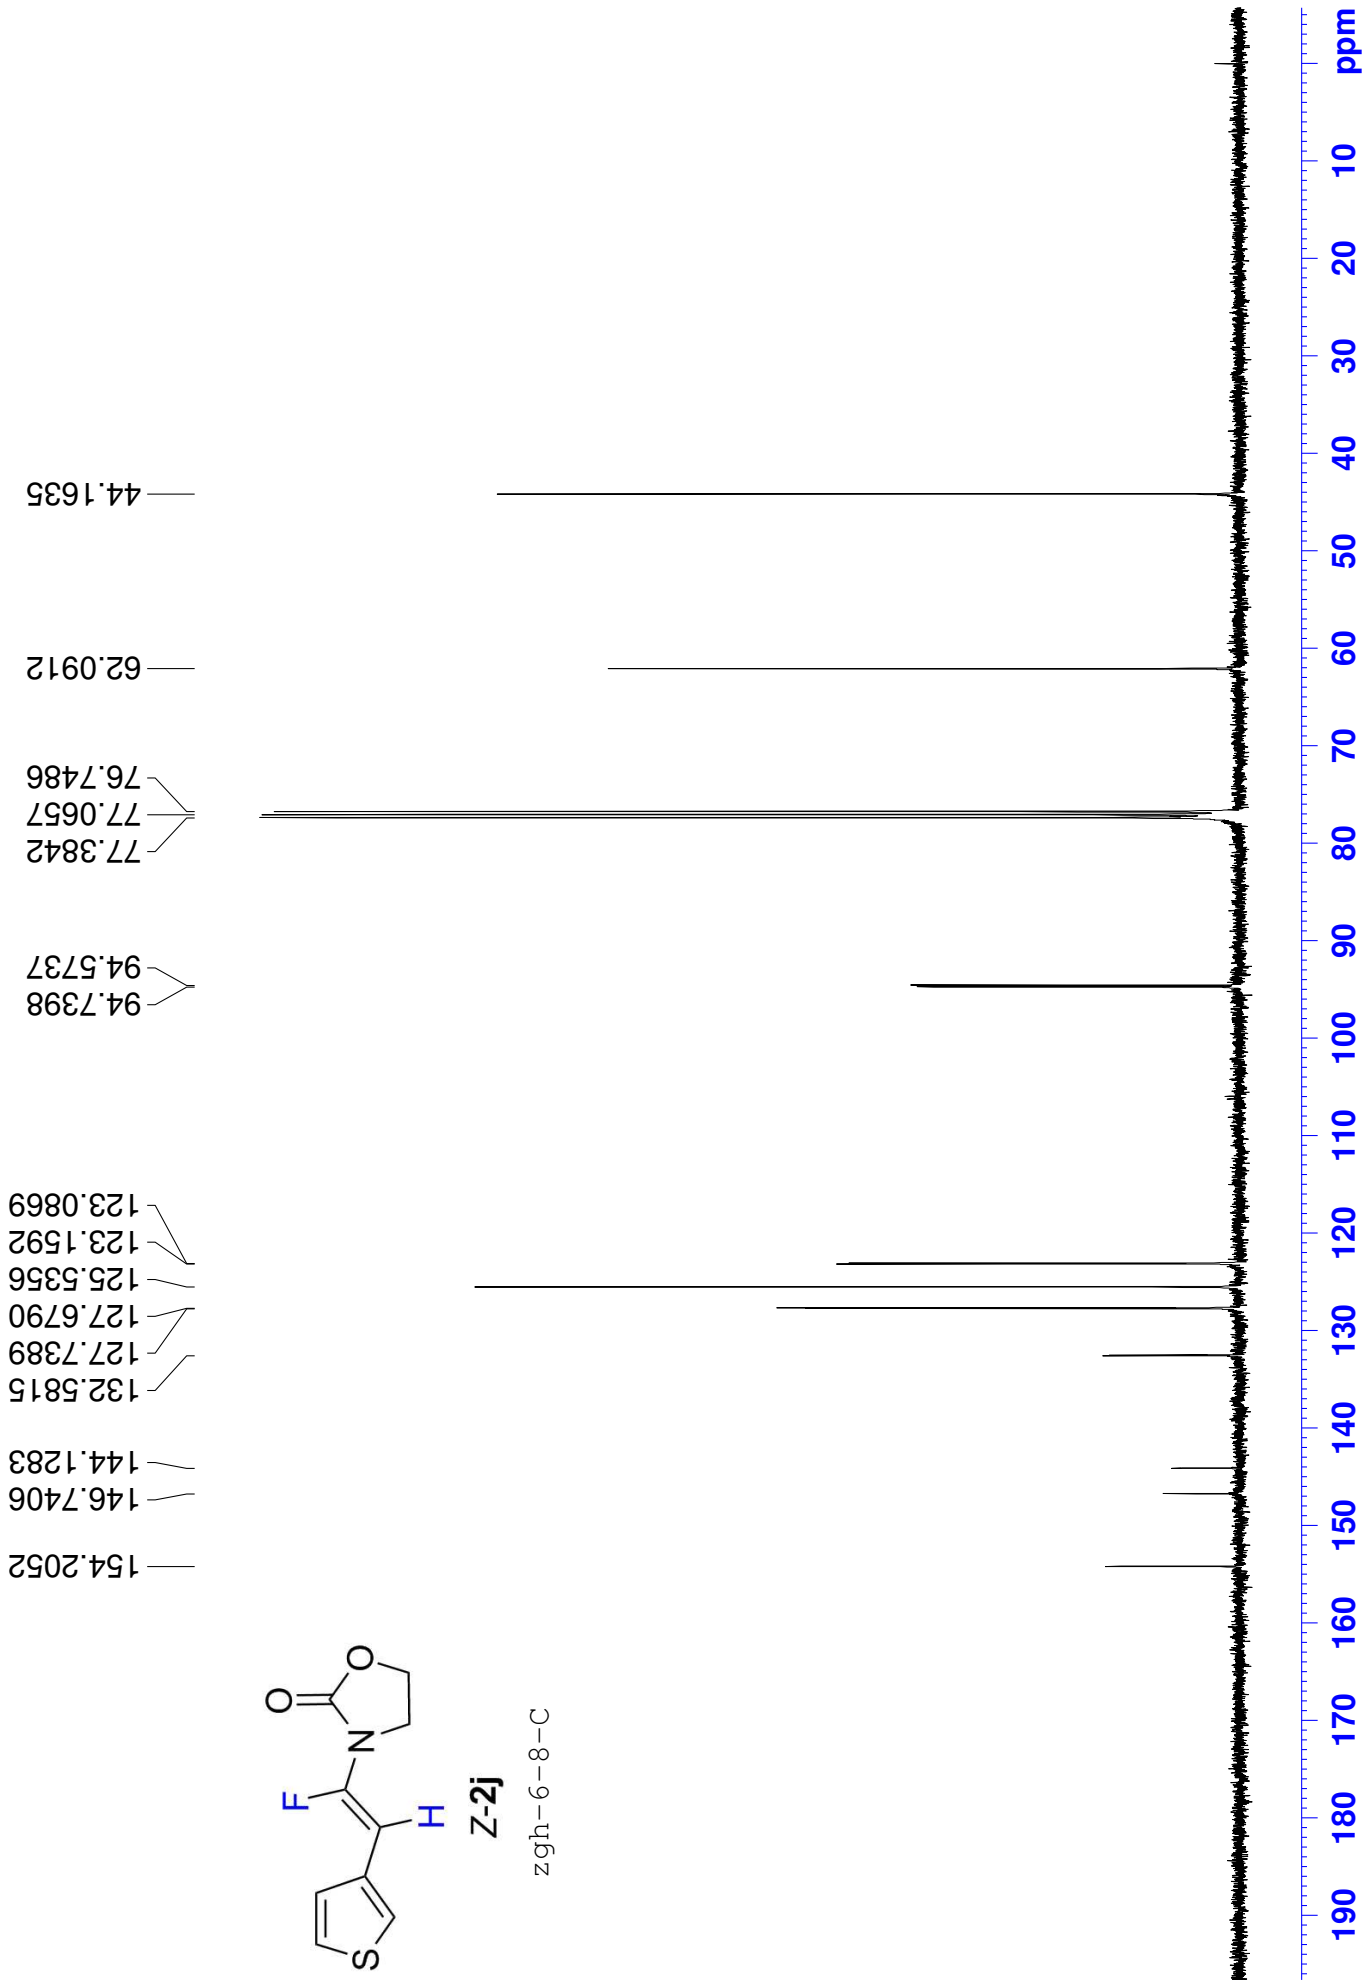

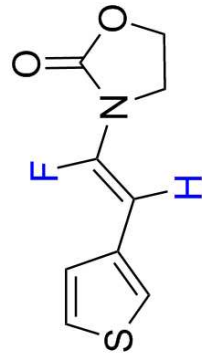

Z-2j

zgh-6-8-F

—99.0002

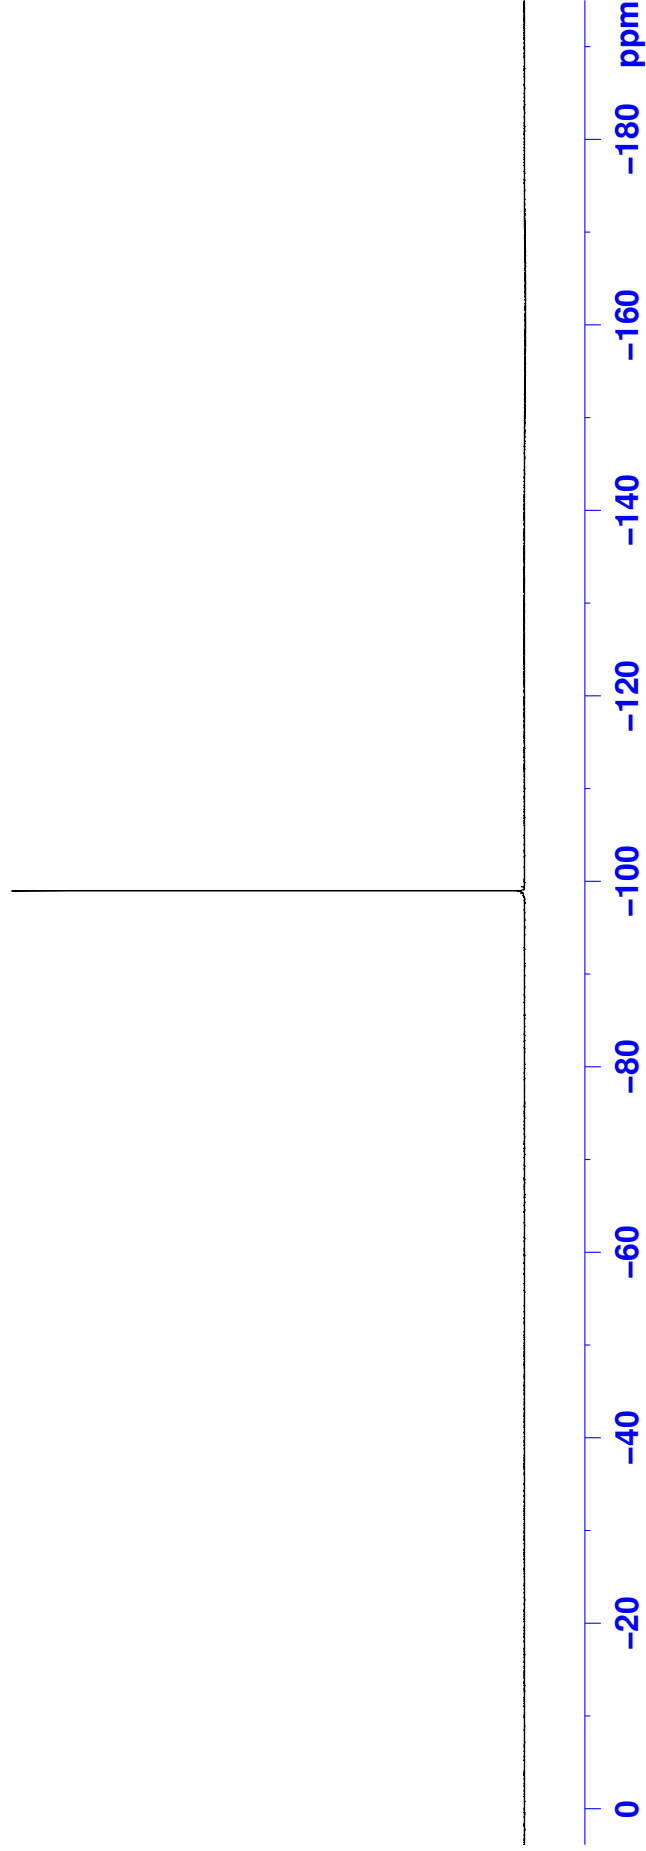



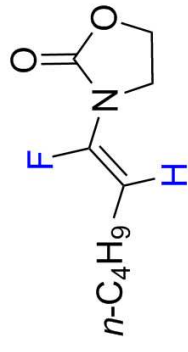

Z-2k

zgh-6-2-H

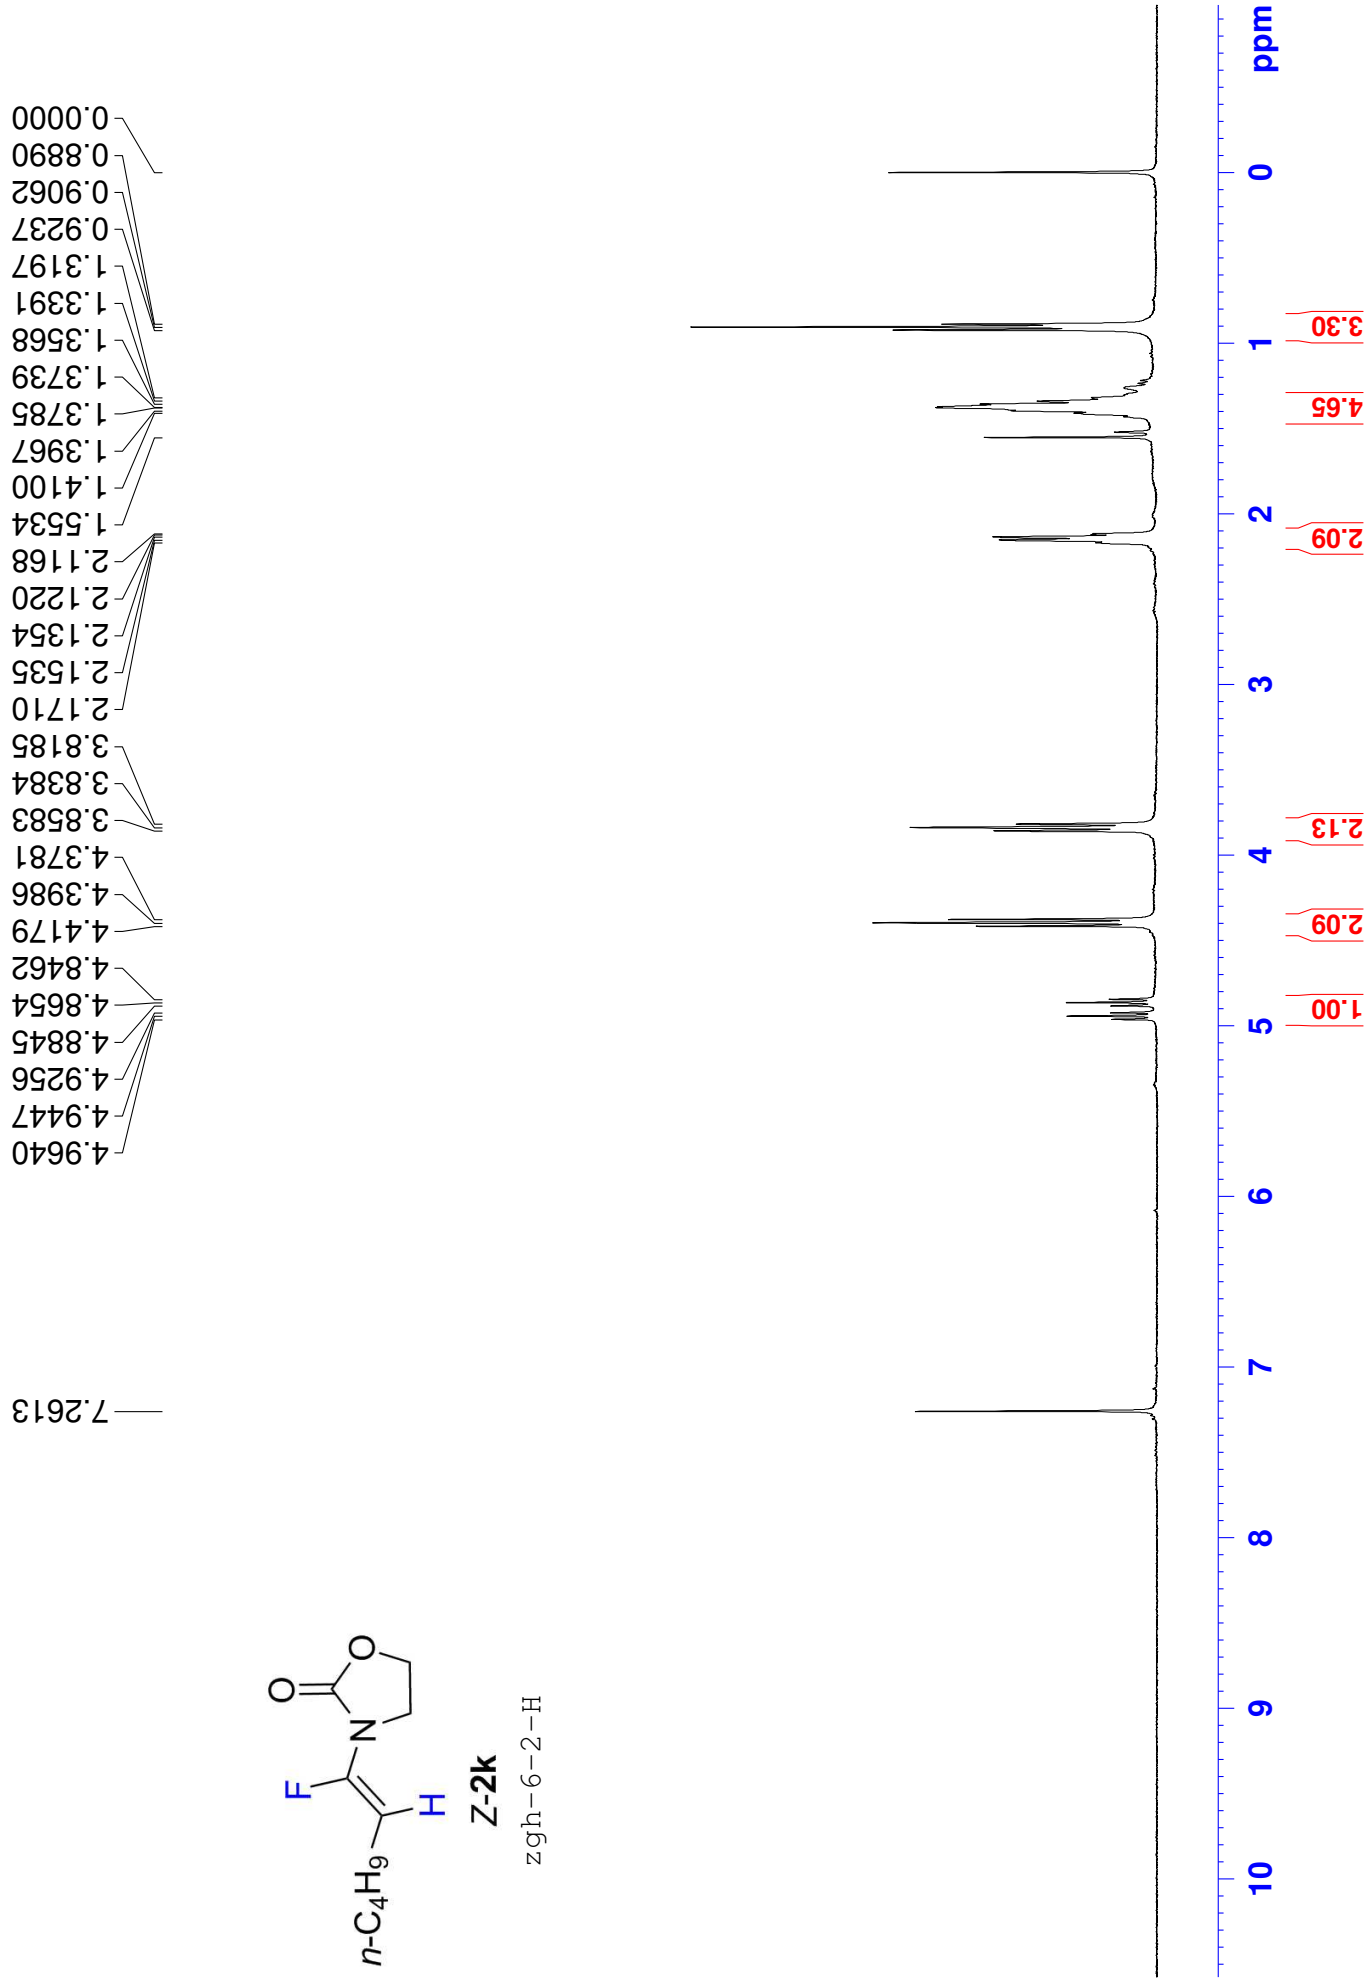

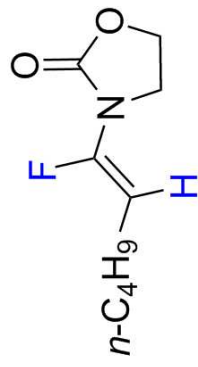

Z-2k

zgh-6-2-C

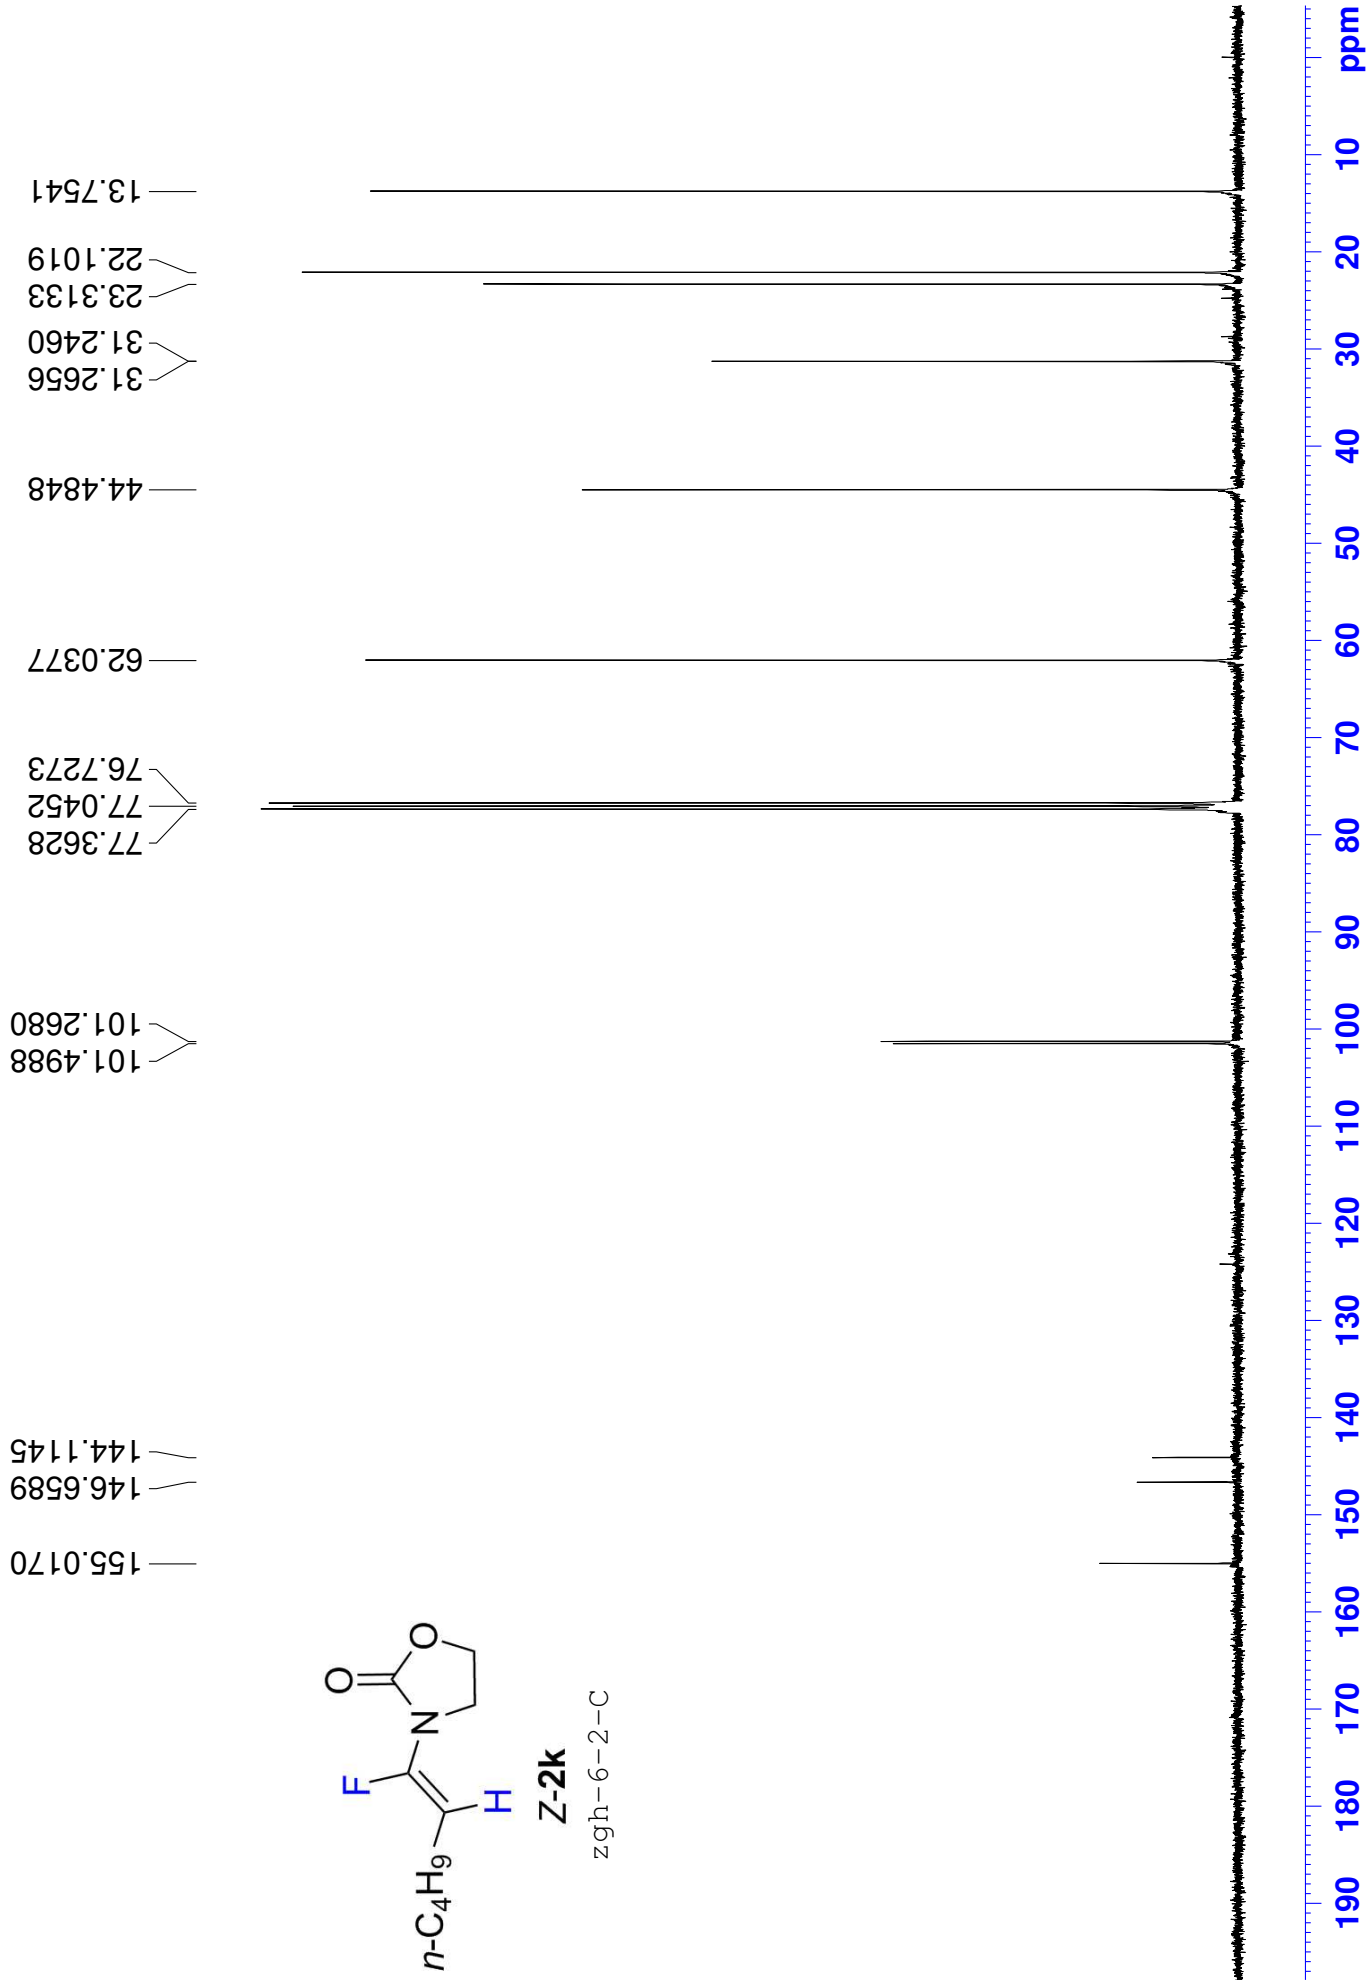

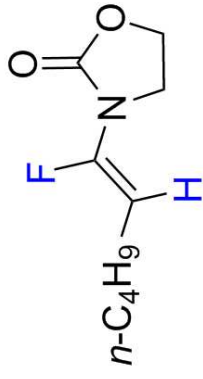

**Z-2k**

zgh-6-2-F

— -105.8722

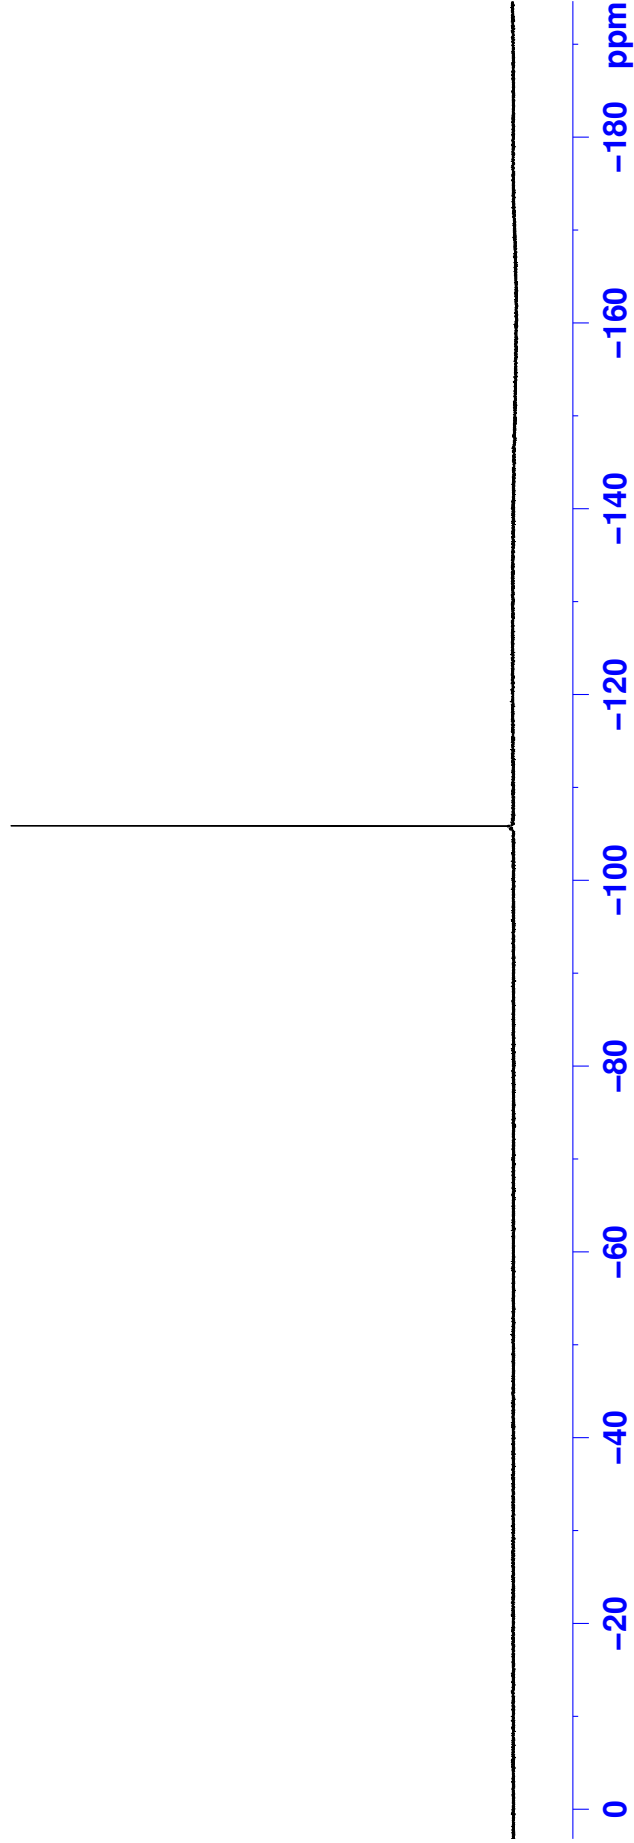

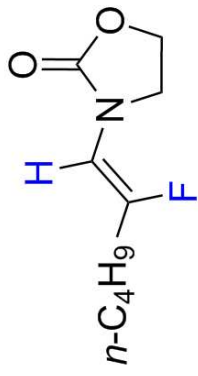

**Z-3k**

zgh-6-2 (2) -H

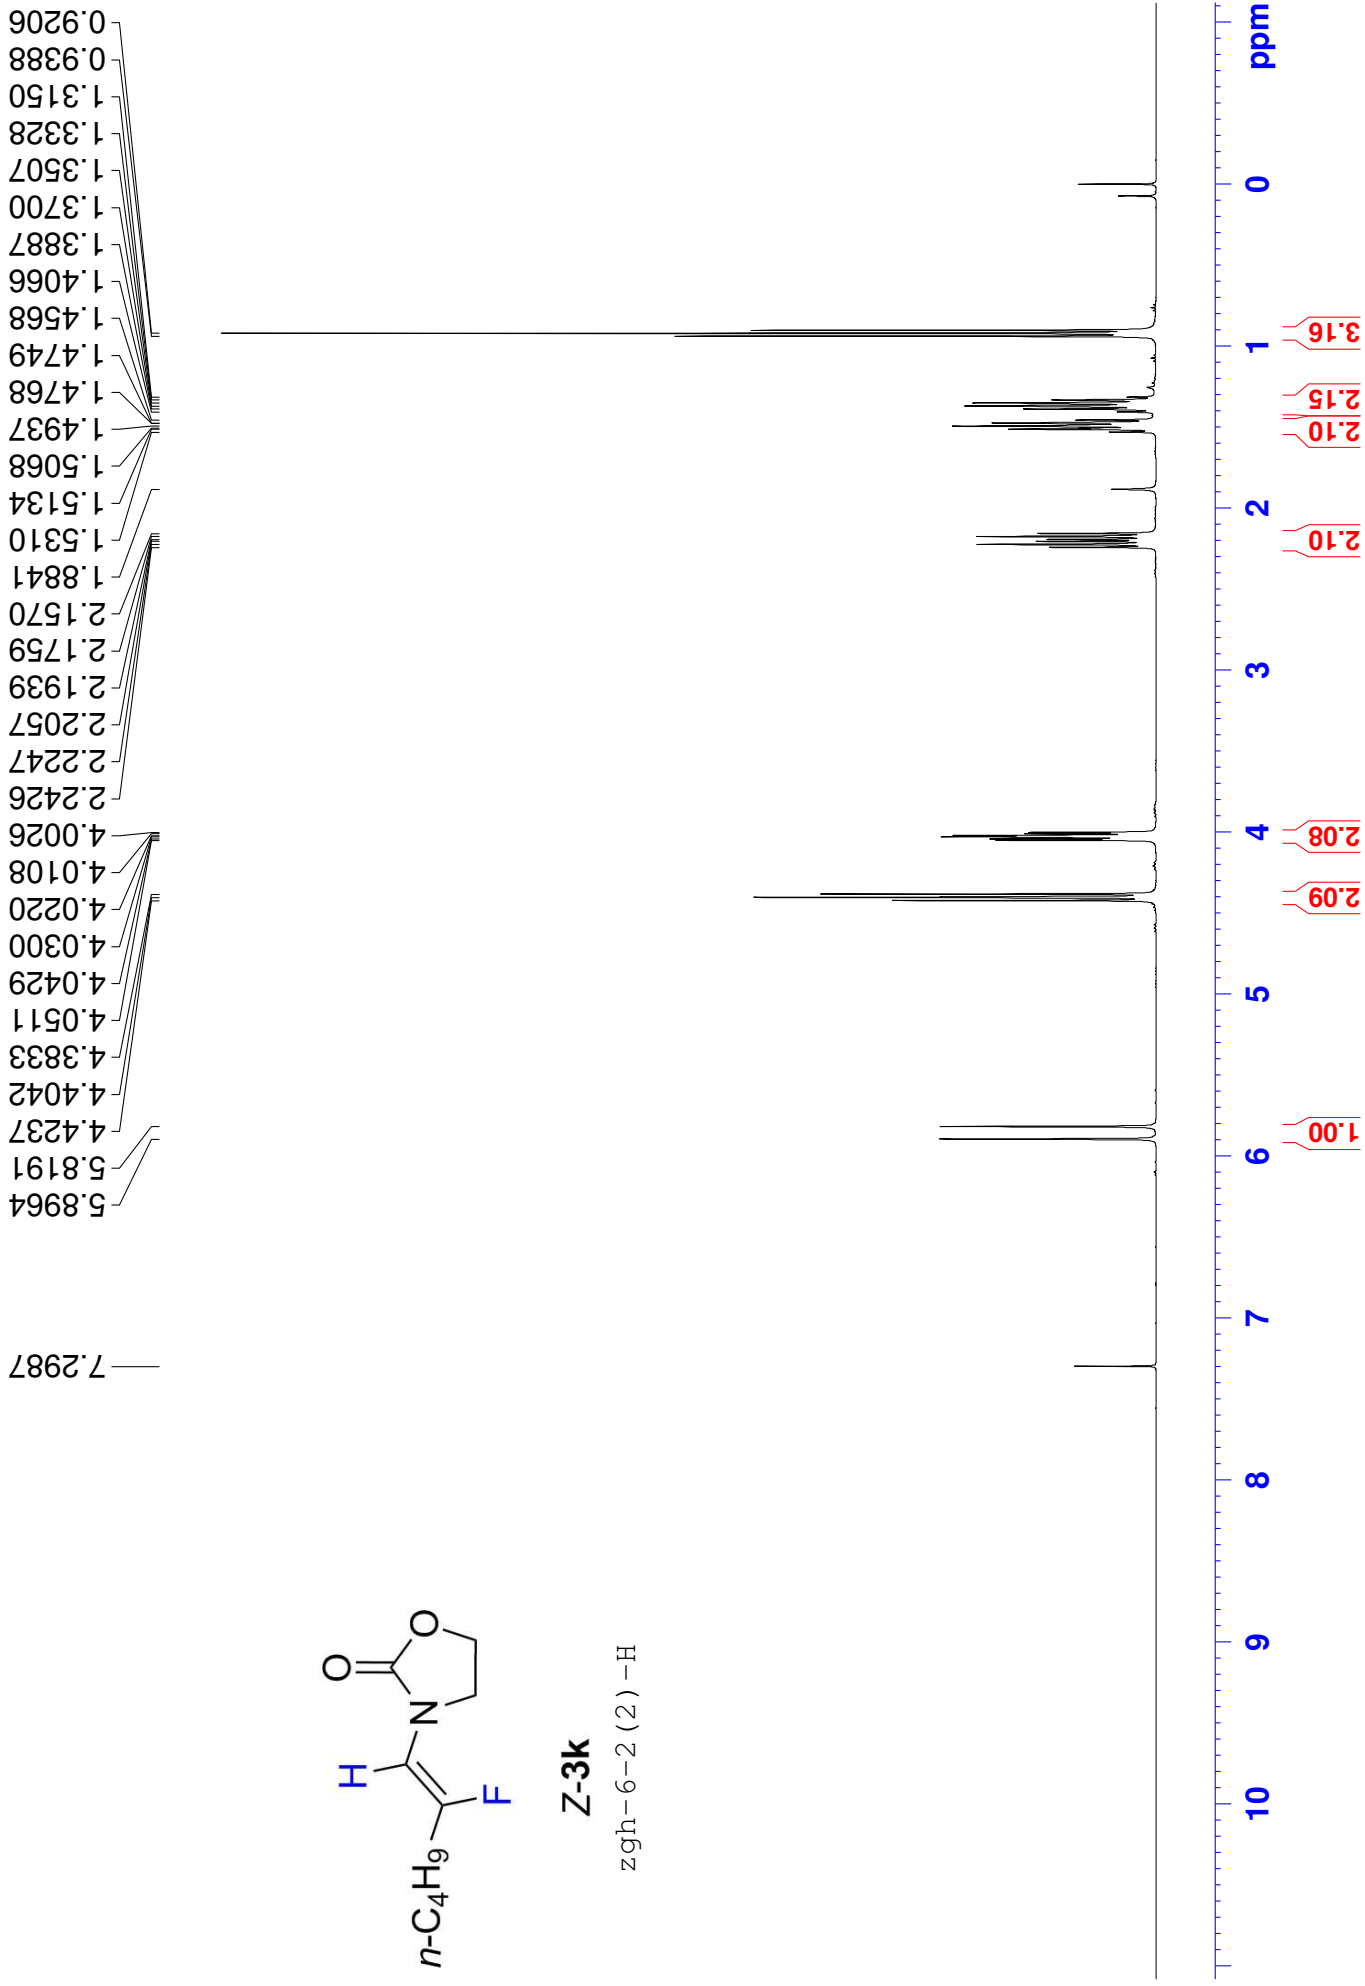

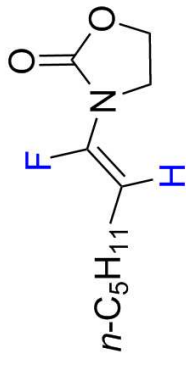

Z-21

zgh-6-75-H

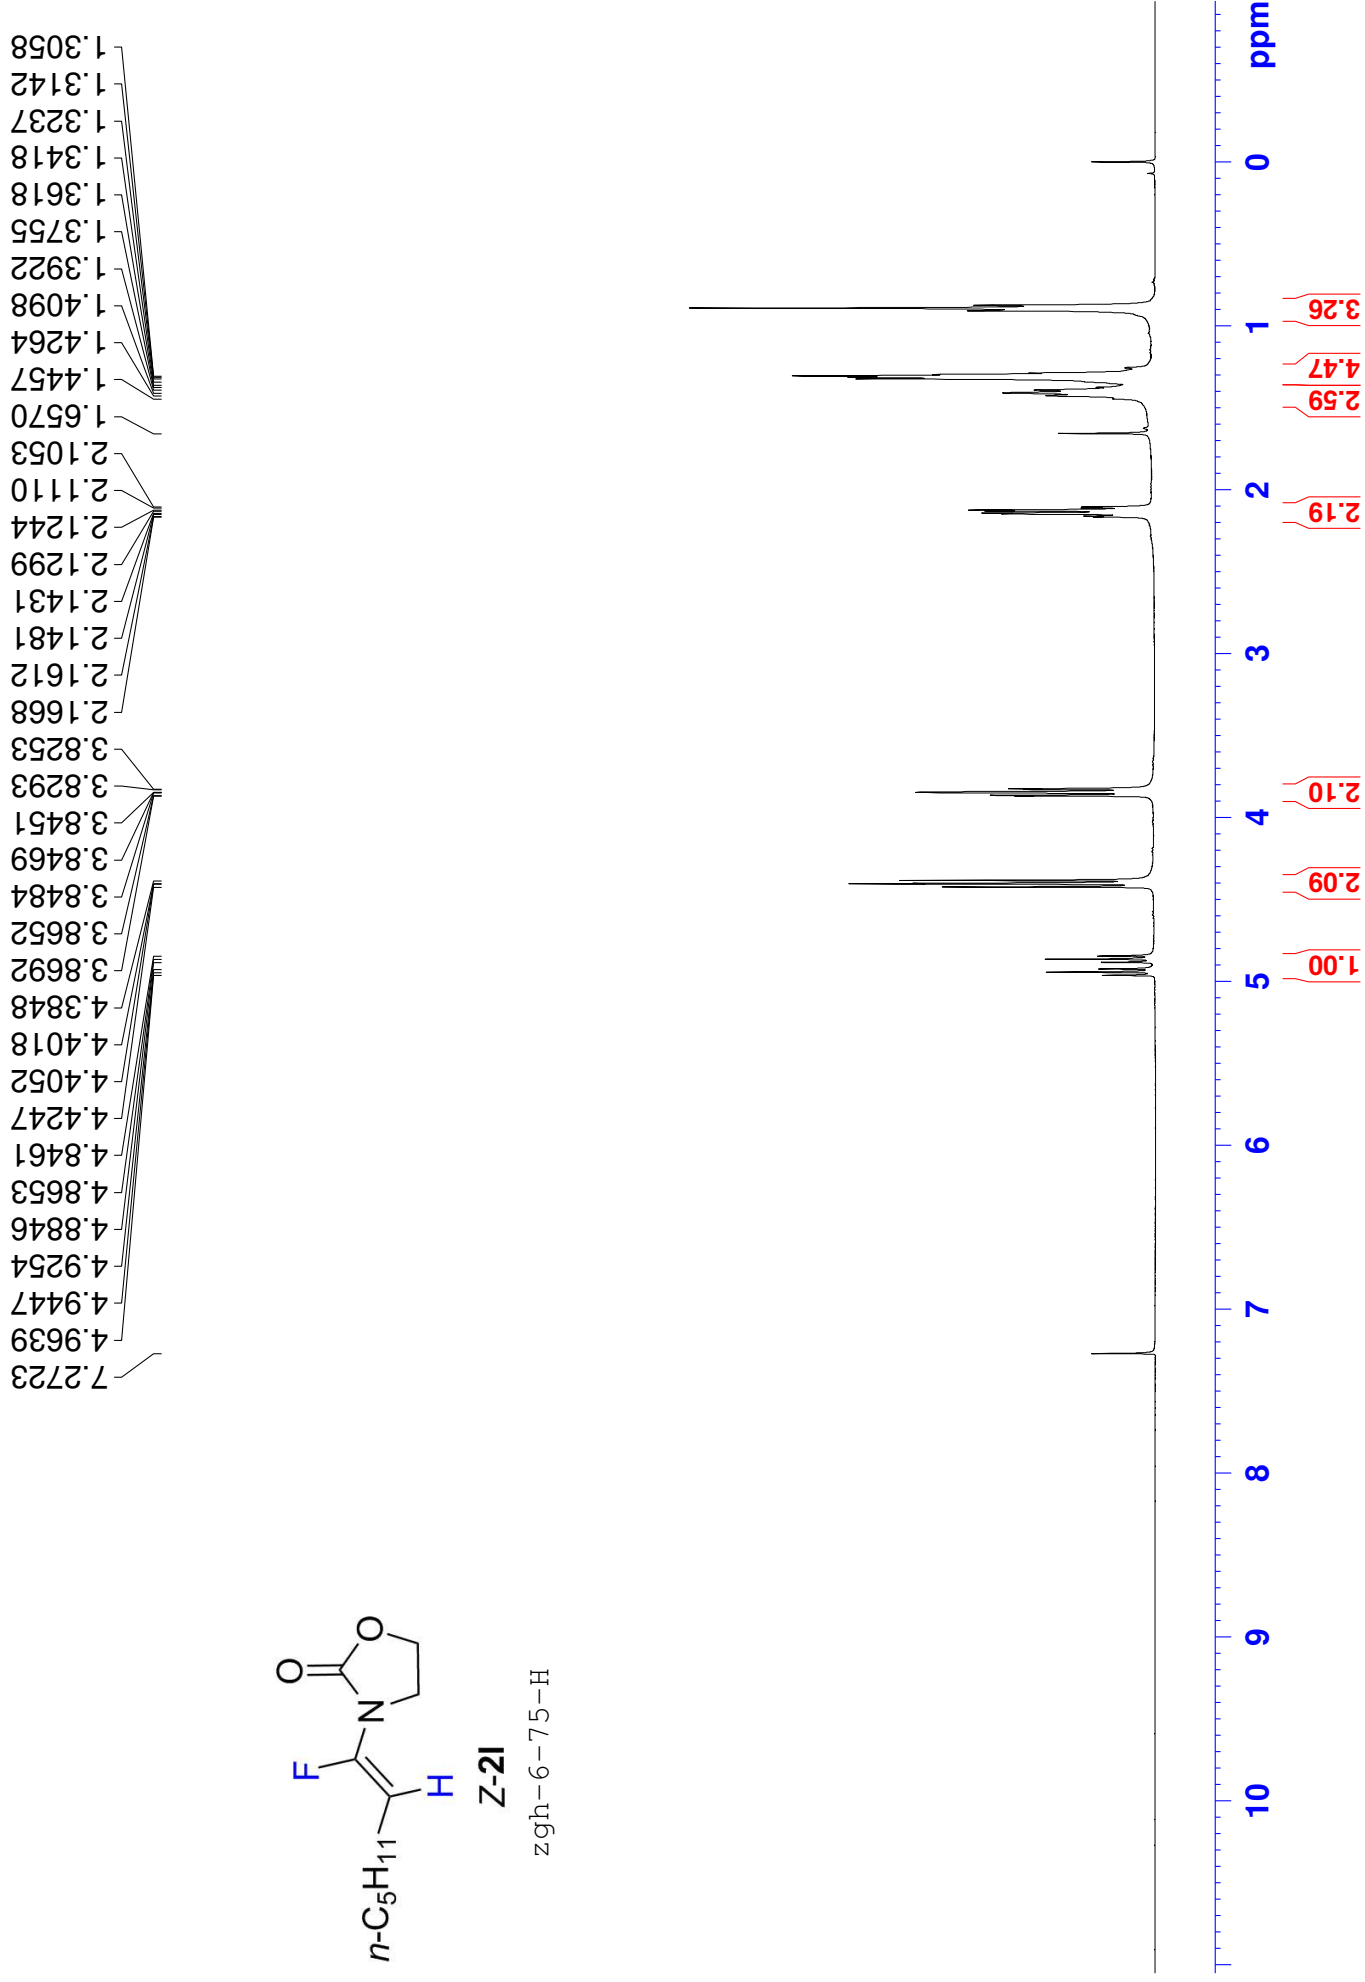

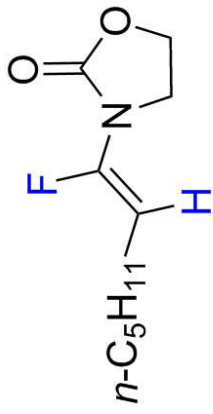

Z-2I

zqh-6-75-C

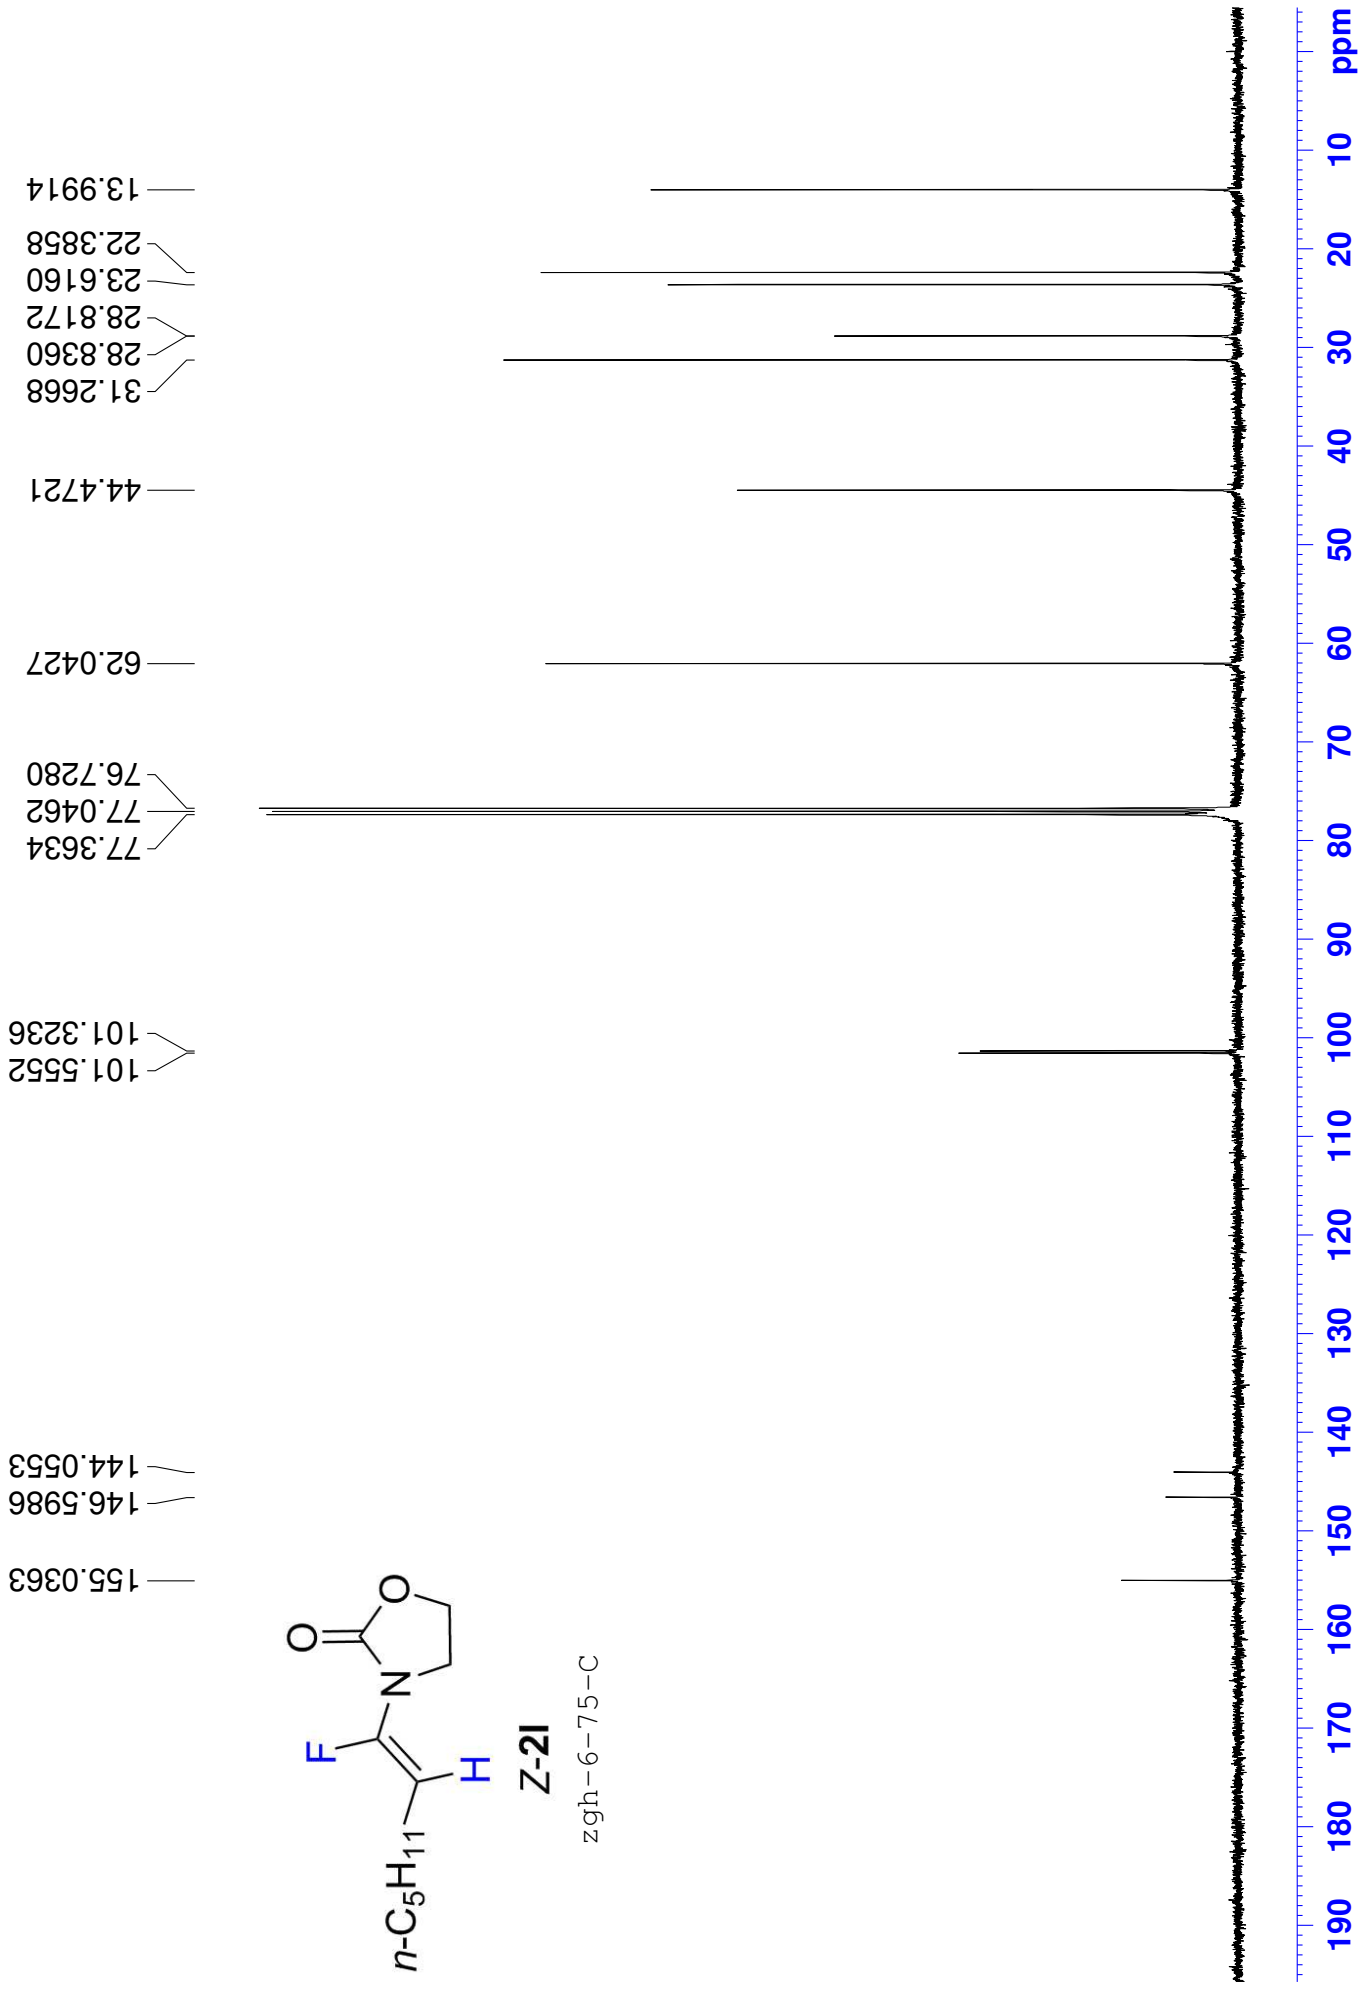

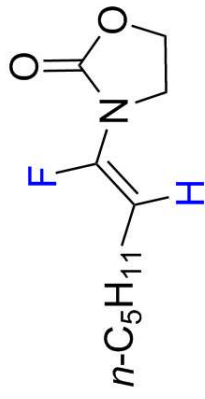

**Z-2I**

zgh-6-75-F

— -105.8377

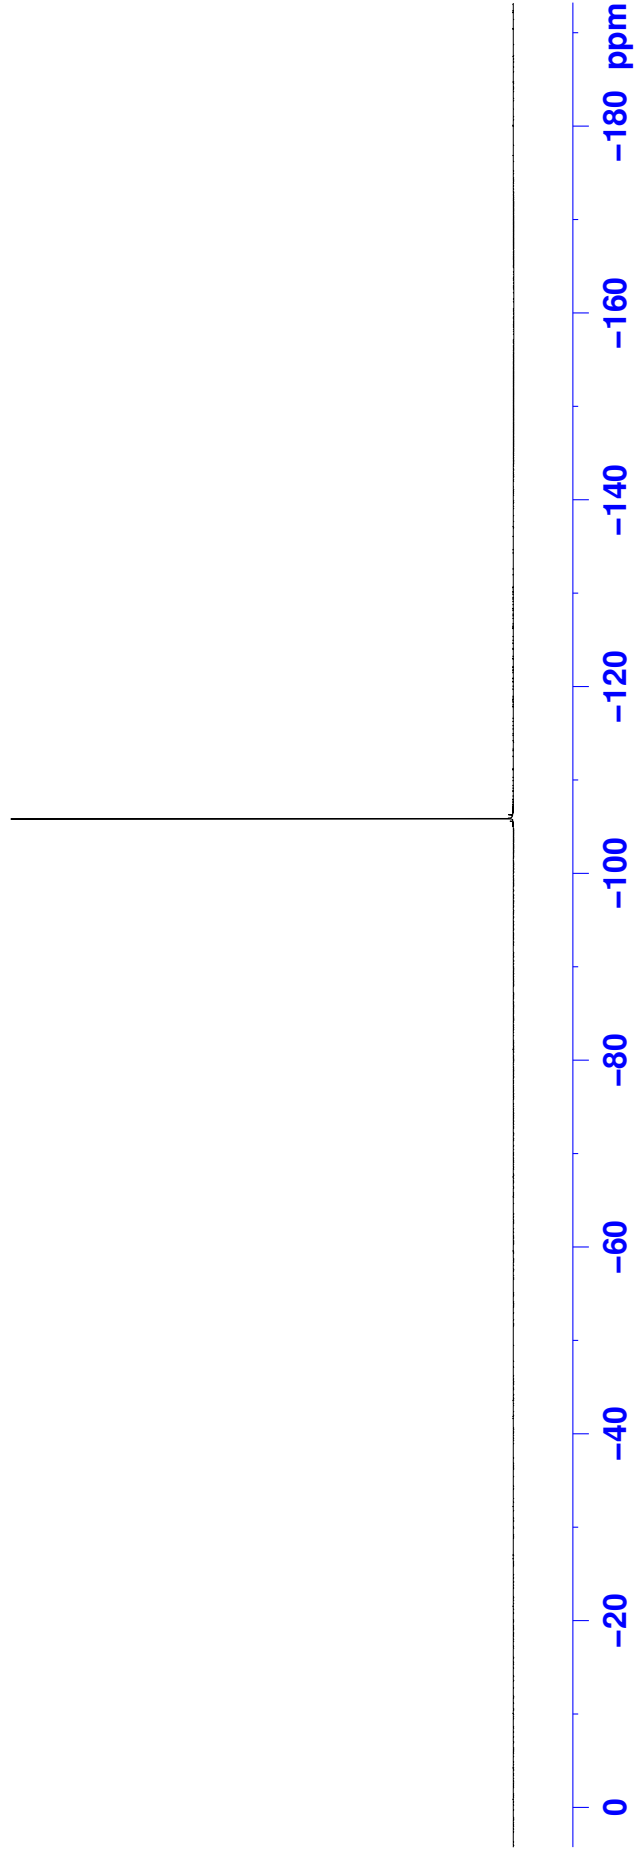

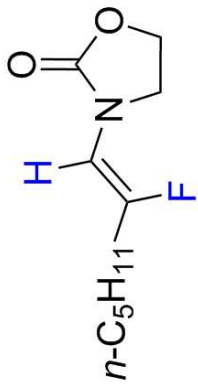

Z-3I

zgh-6-75 (2) -H

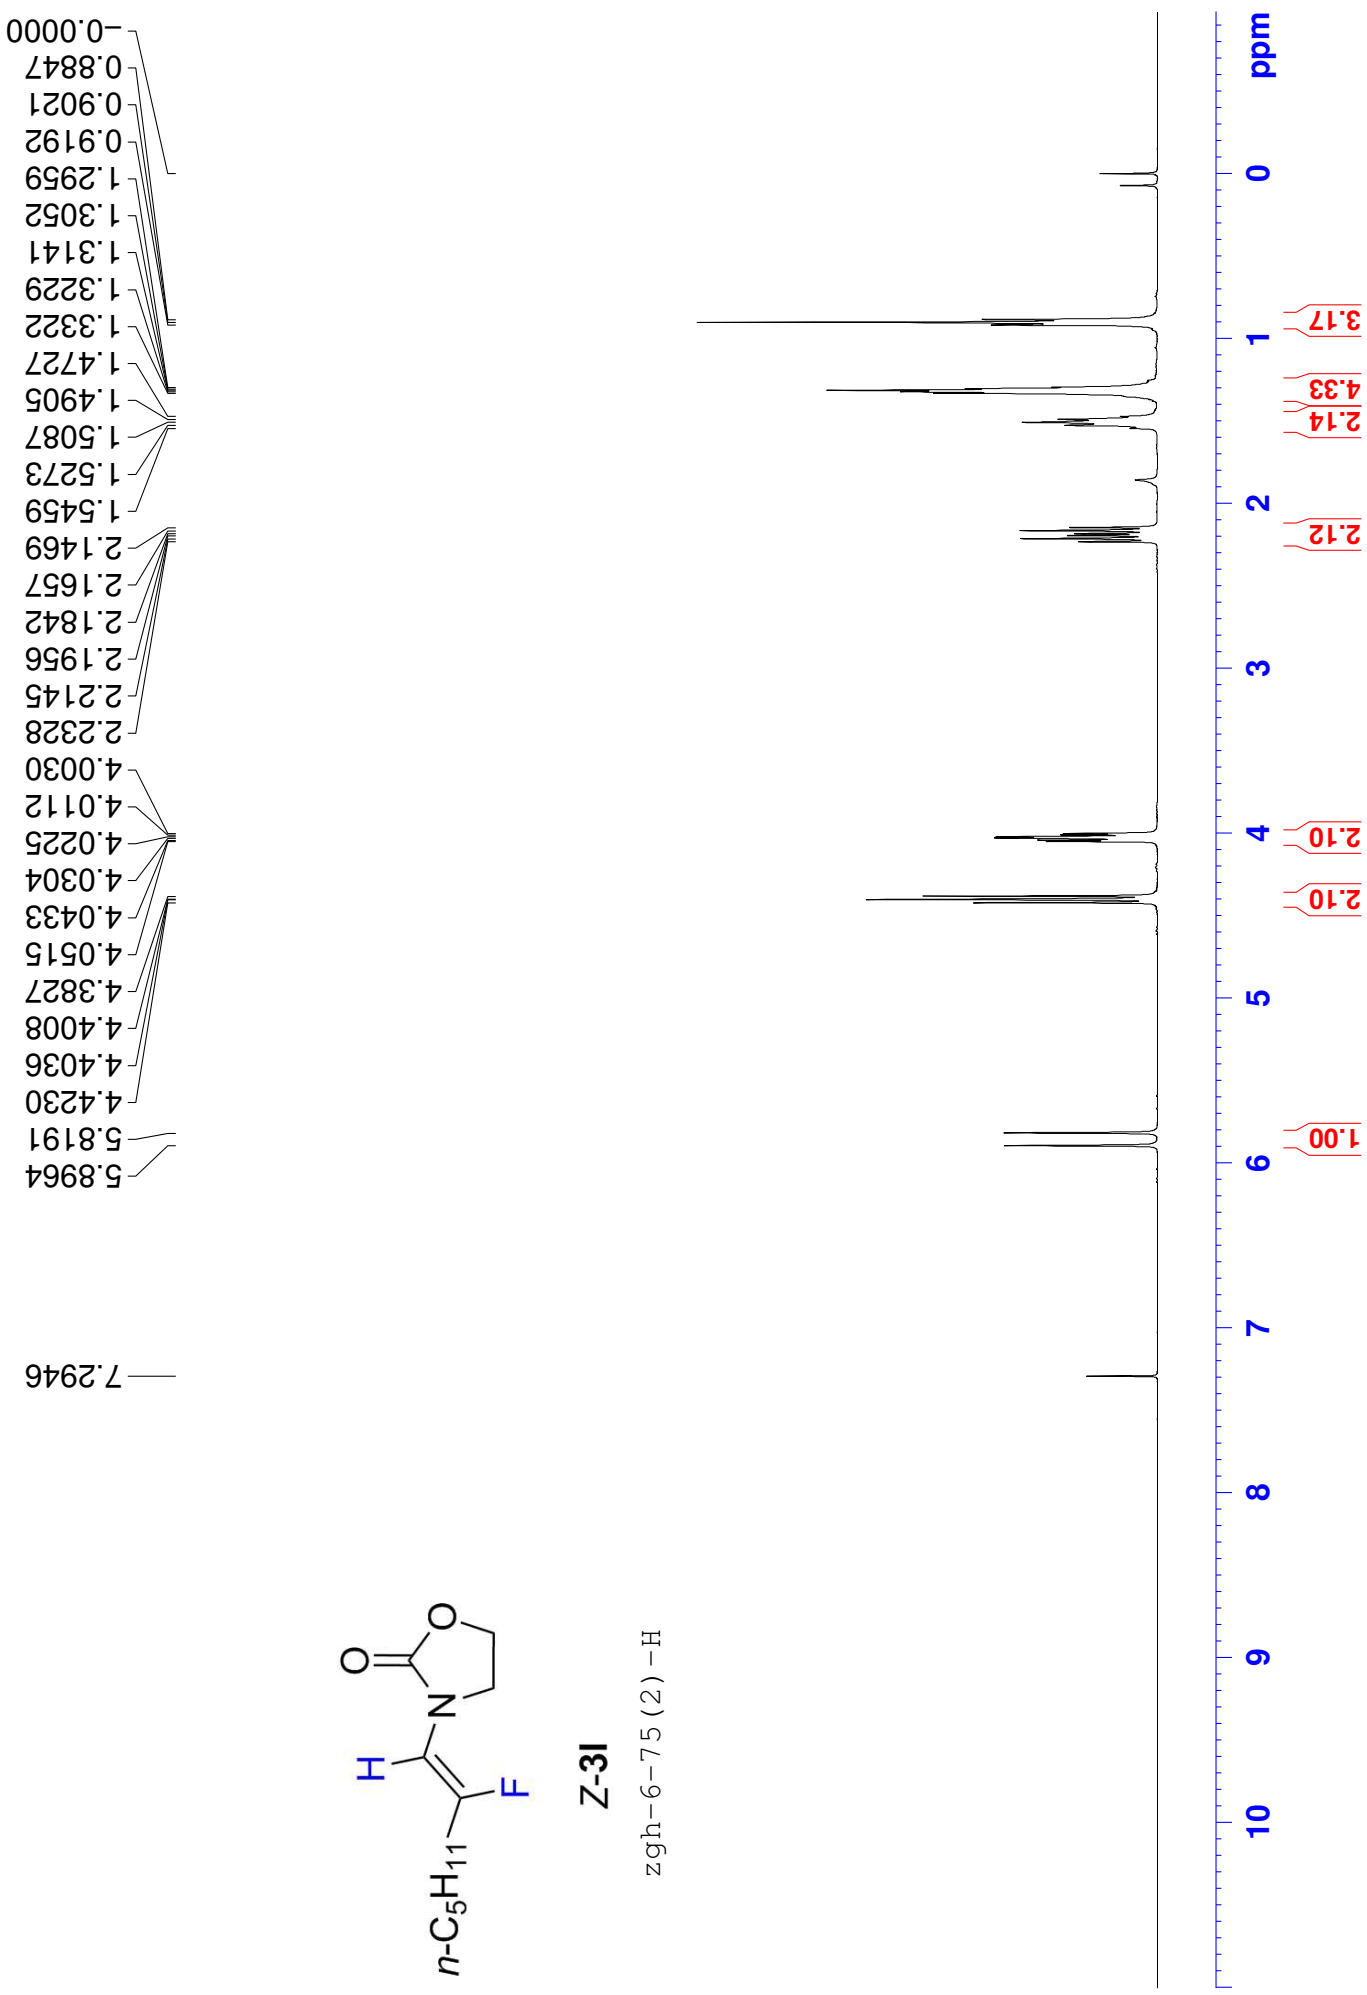



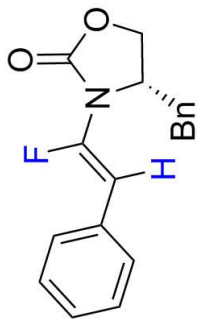

Z-2m

zgh-5-177-H

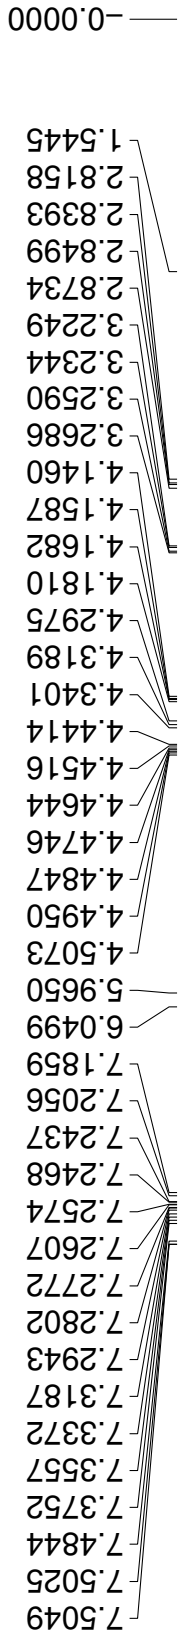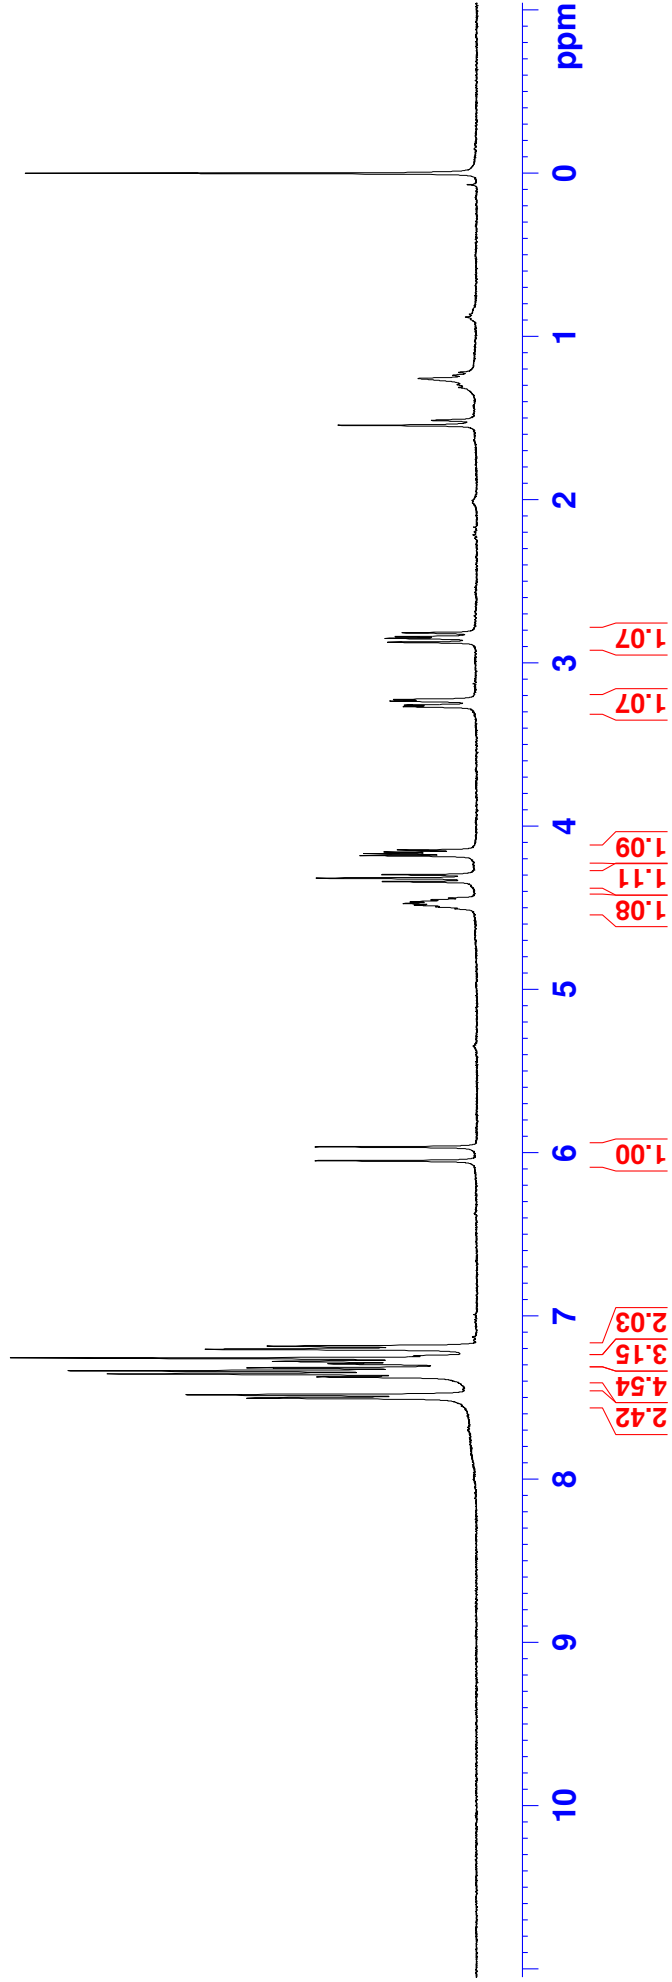

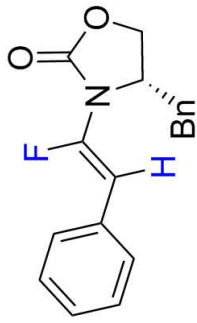

Z-2m

zgh-5-177-C

154.2872  
146.1540  
143.4950  
134.7020  
132.1191  
132.0604  
129.2478  
129.0434  
128.6340  
128.5913  
128.5615  
127.5611  
127.5399  
127.4743  
103.3171  
103.1627

77.4107  
77.0926  
76.7747

66.8045

56.4175

38.7051  
38.6905

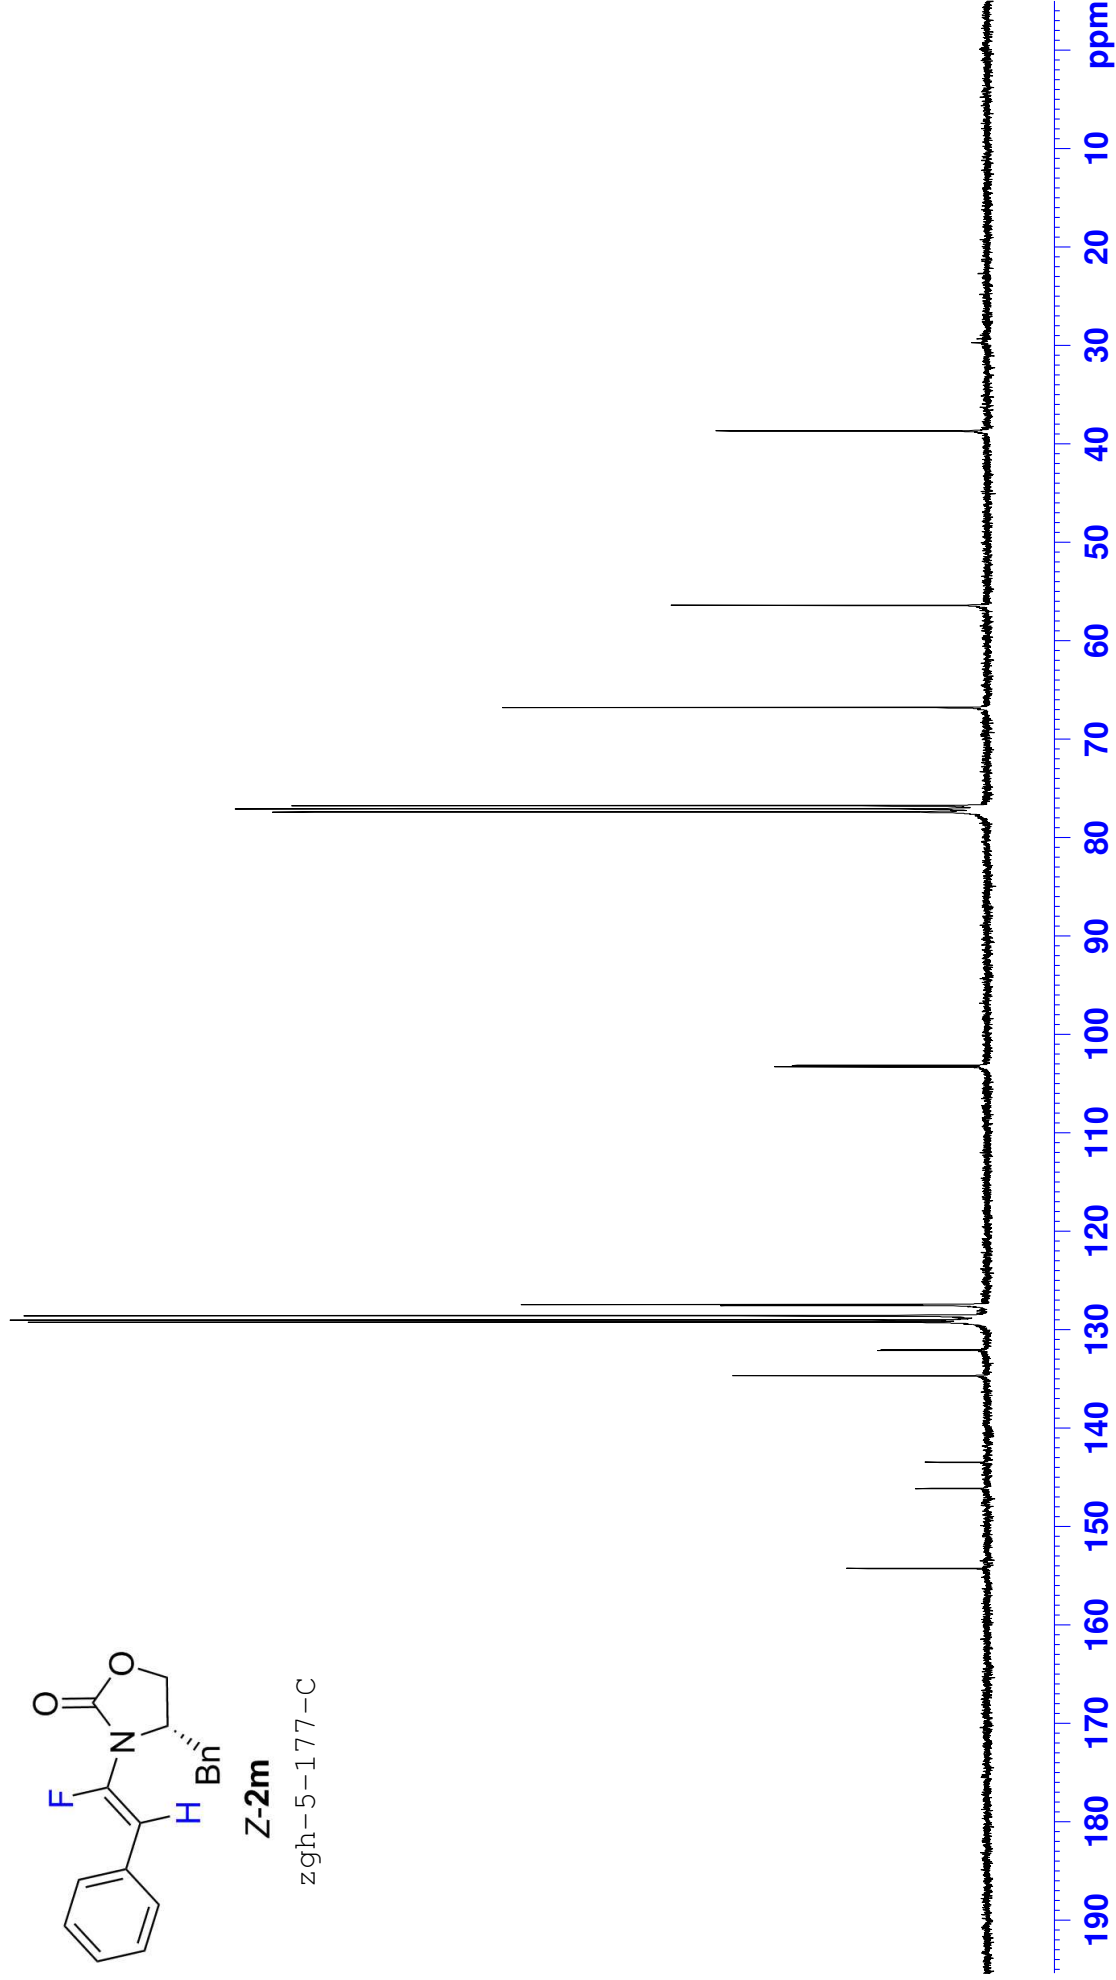

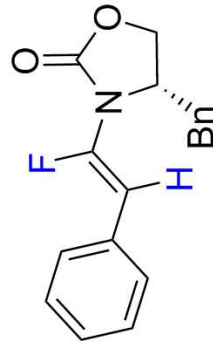

**Z-2m**

zgh-5-177-F

—97.9325

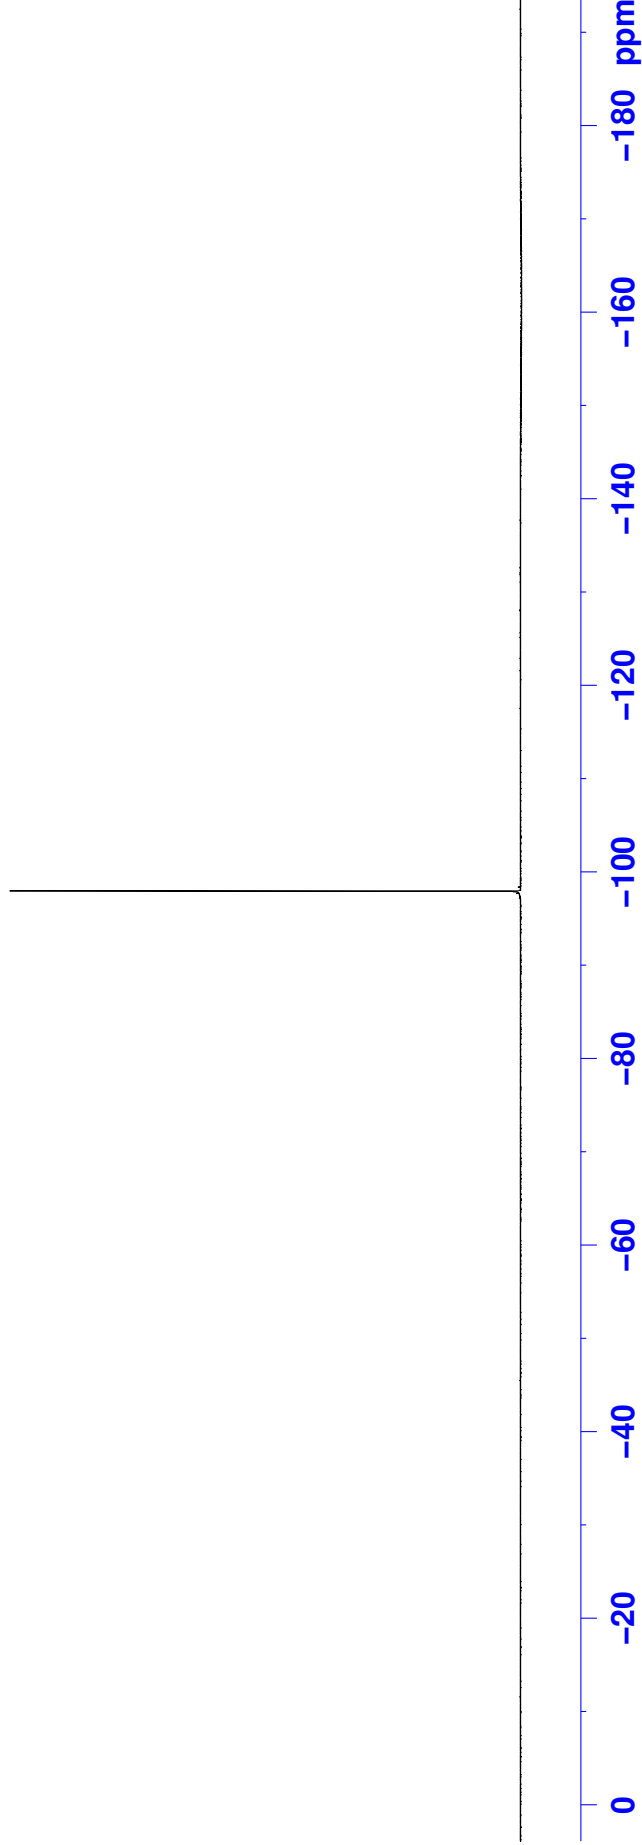

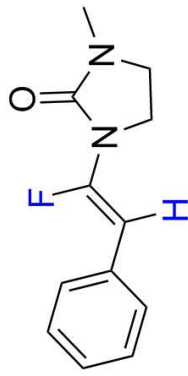

Z-2n

zgh-6-99-H

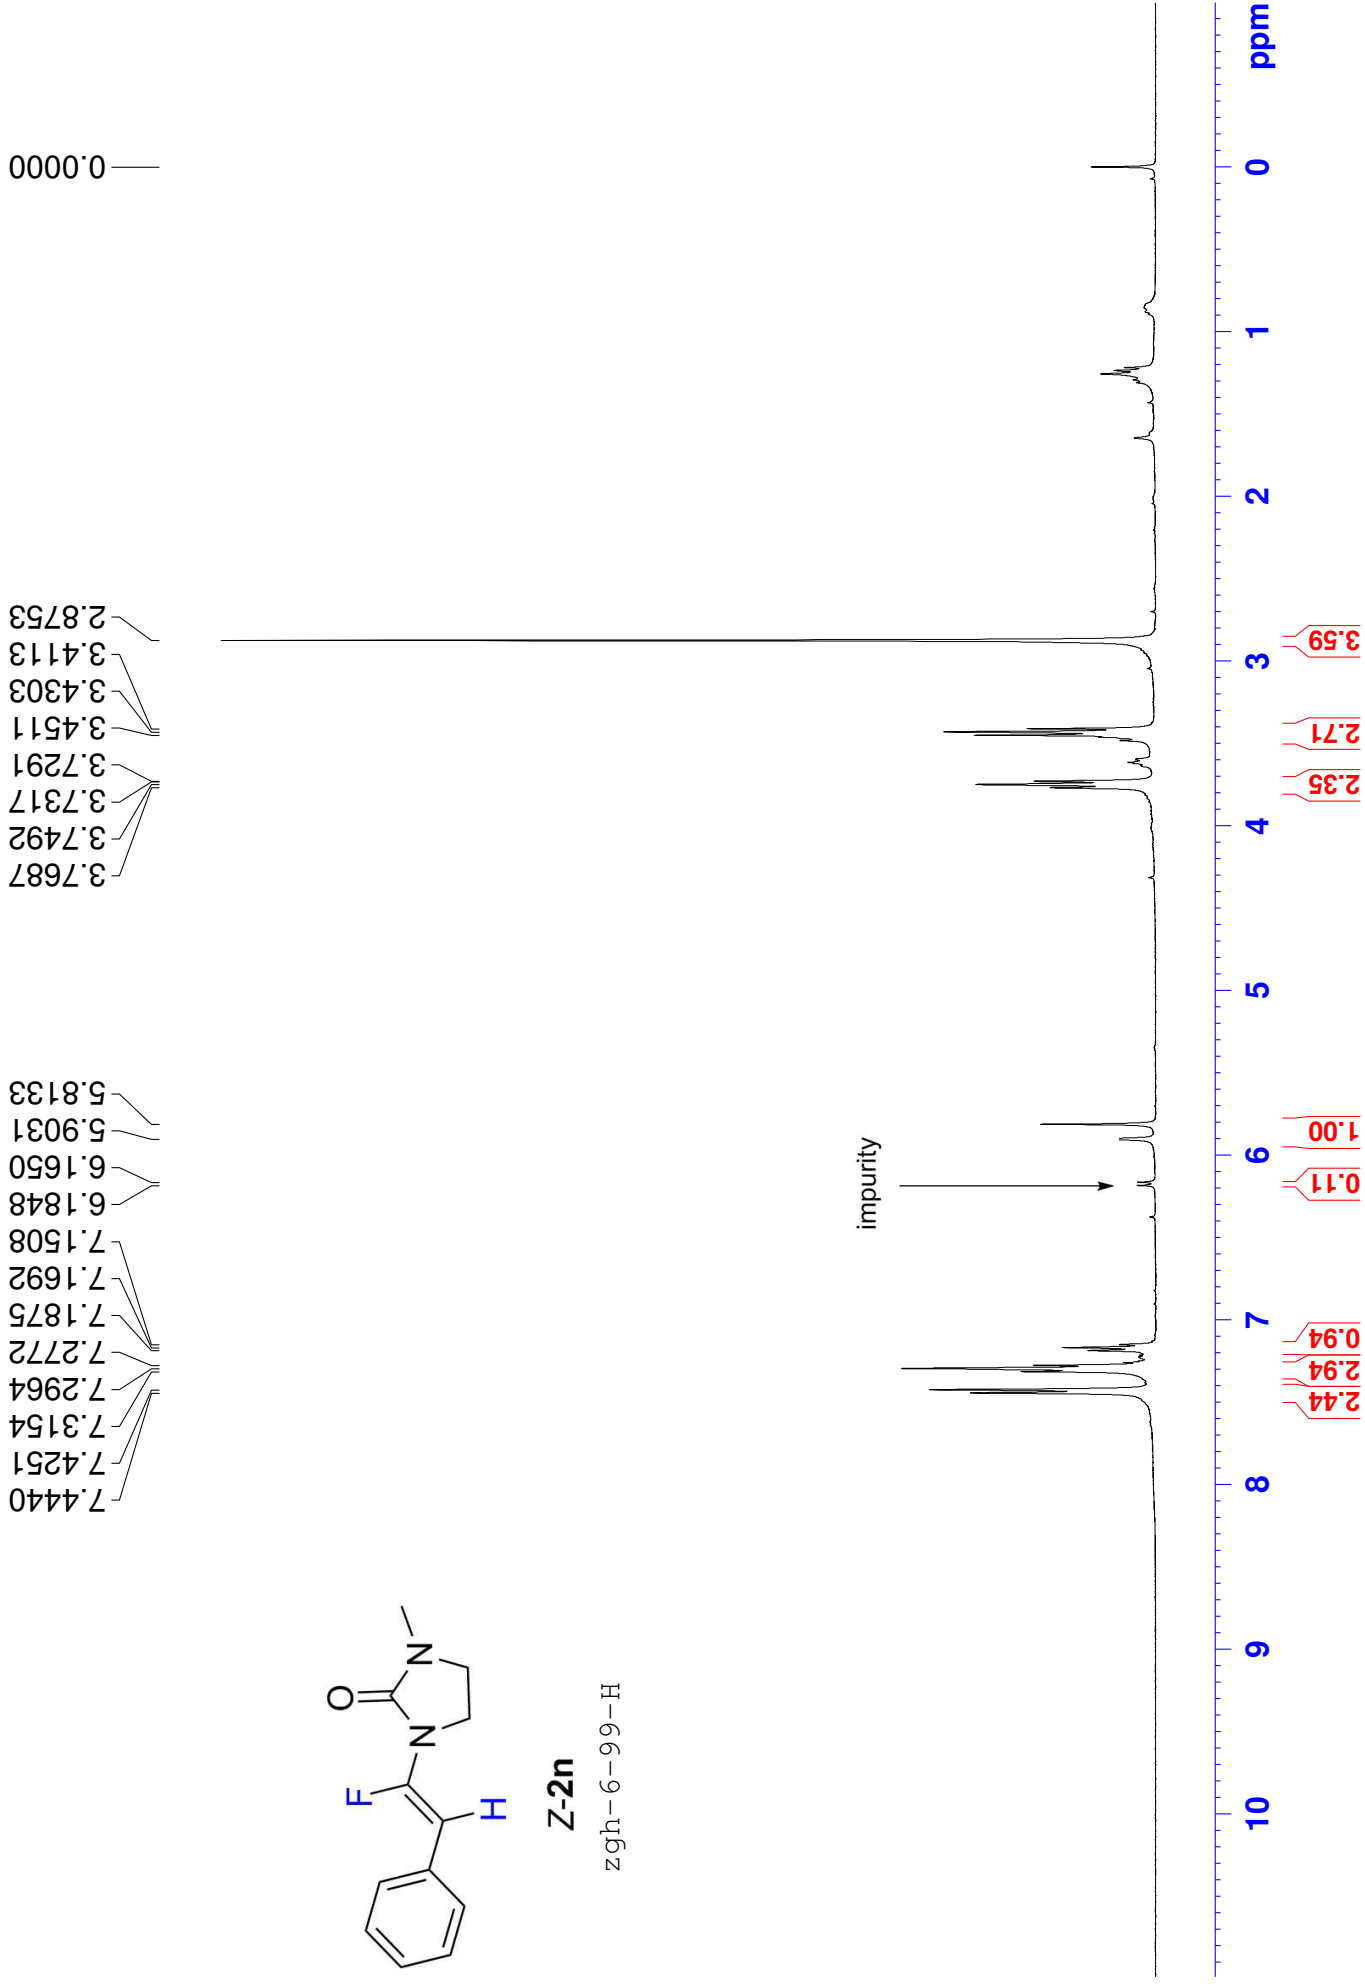

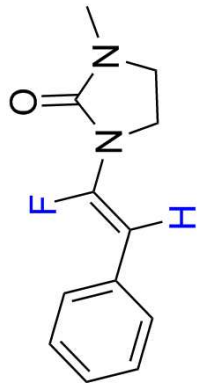

Z-2n

zgh-6-99-C

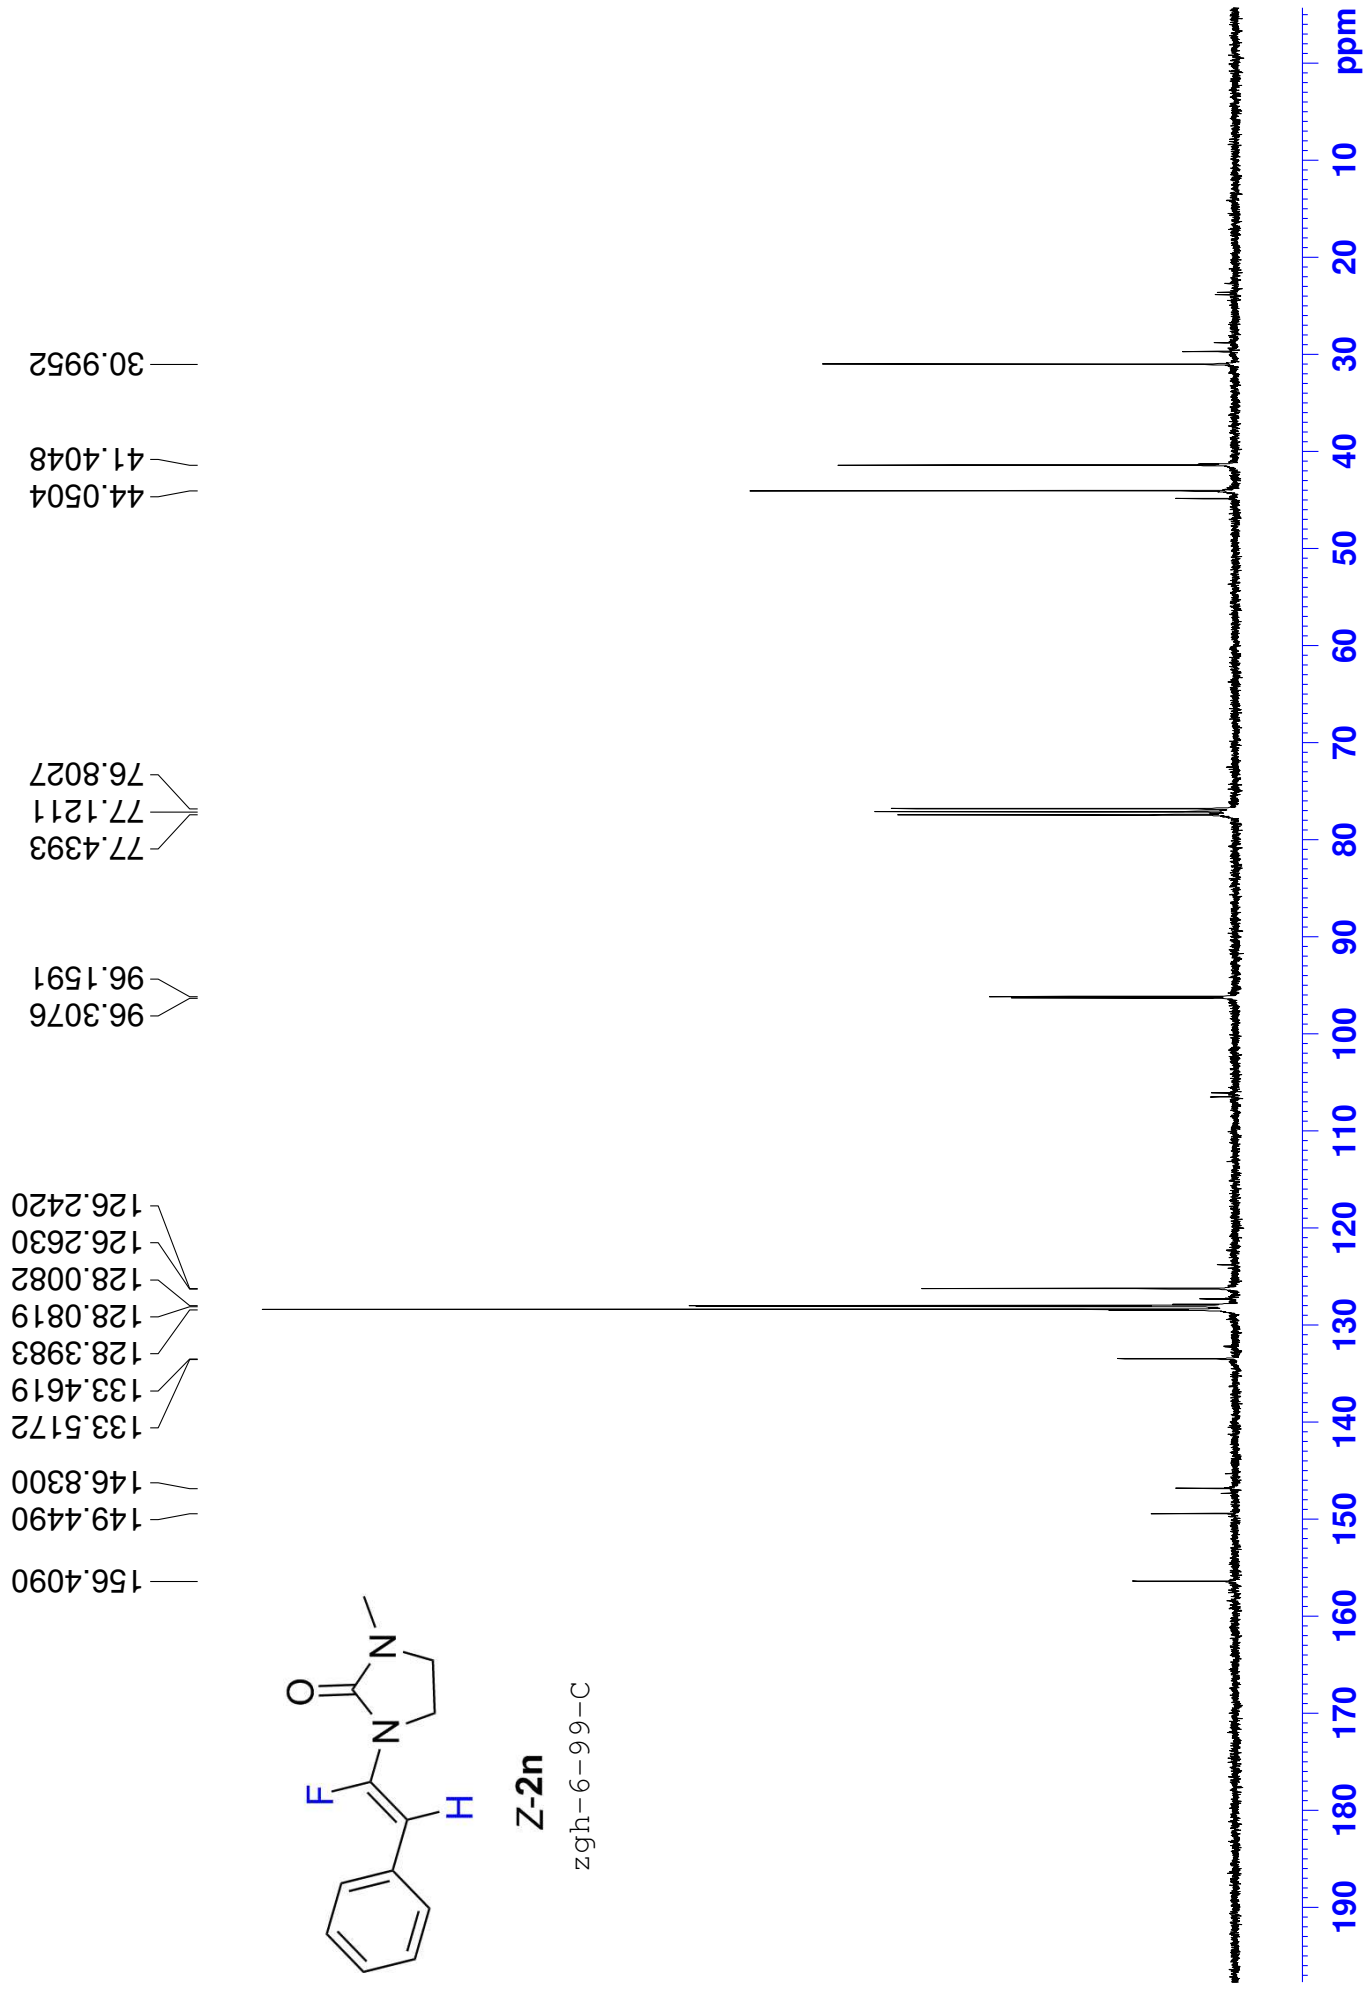

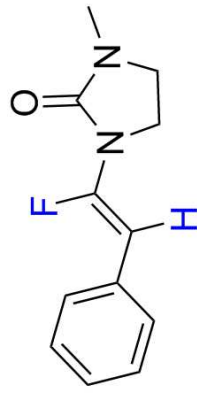

**Z-2n**

zgh-6-99-F

— -97.9714

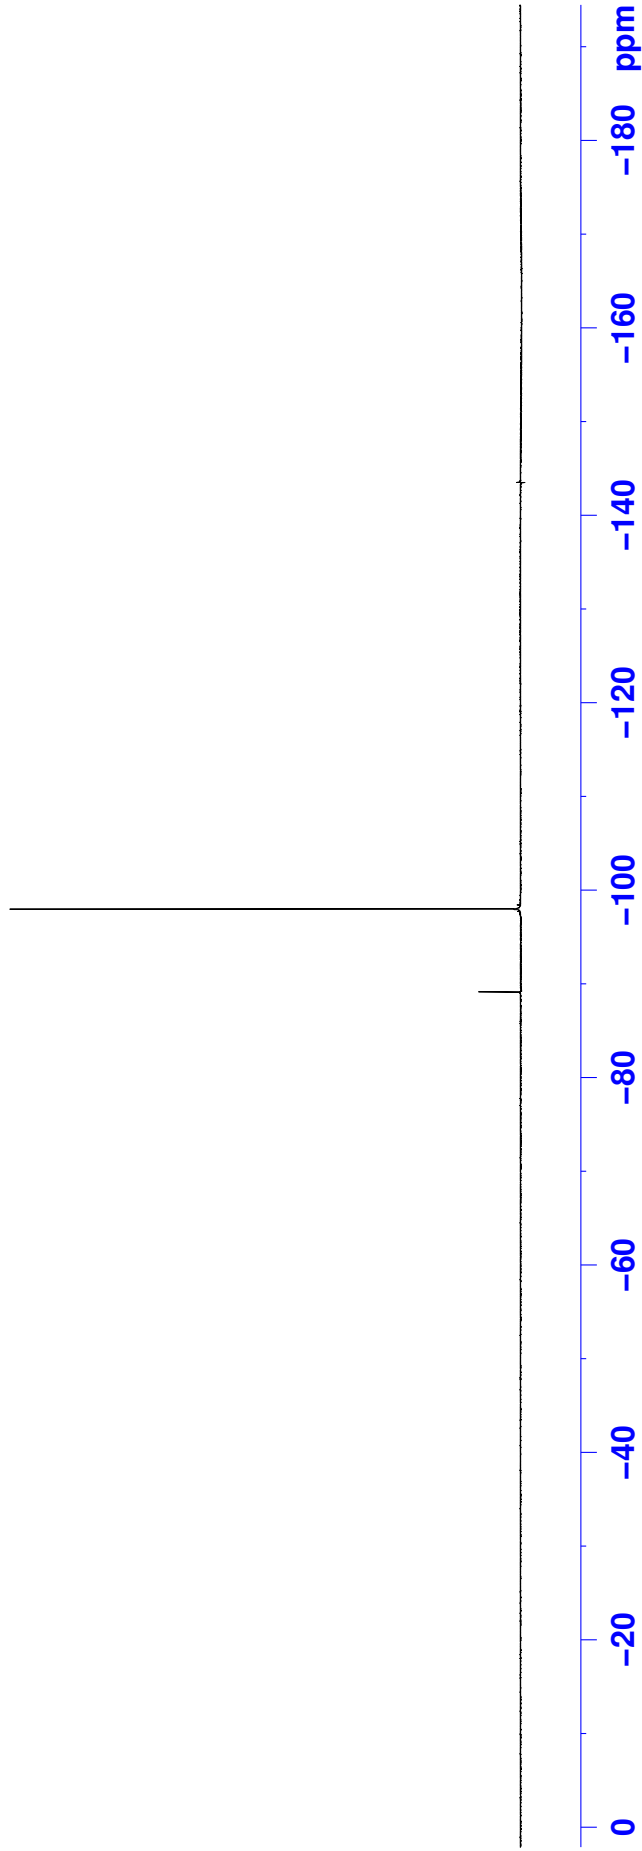

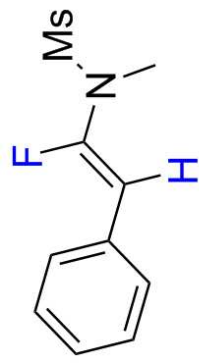

**Z-20**

zgh-6-51-H

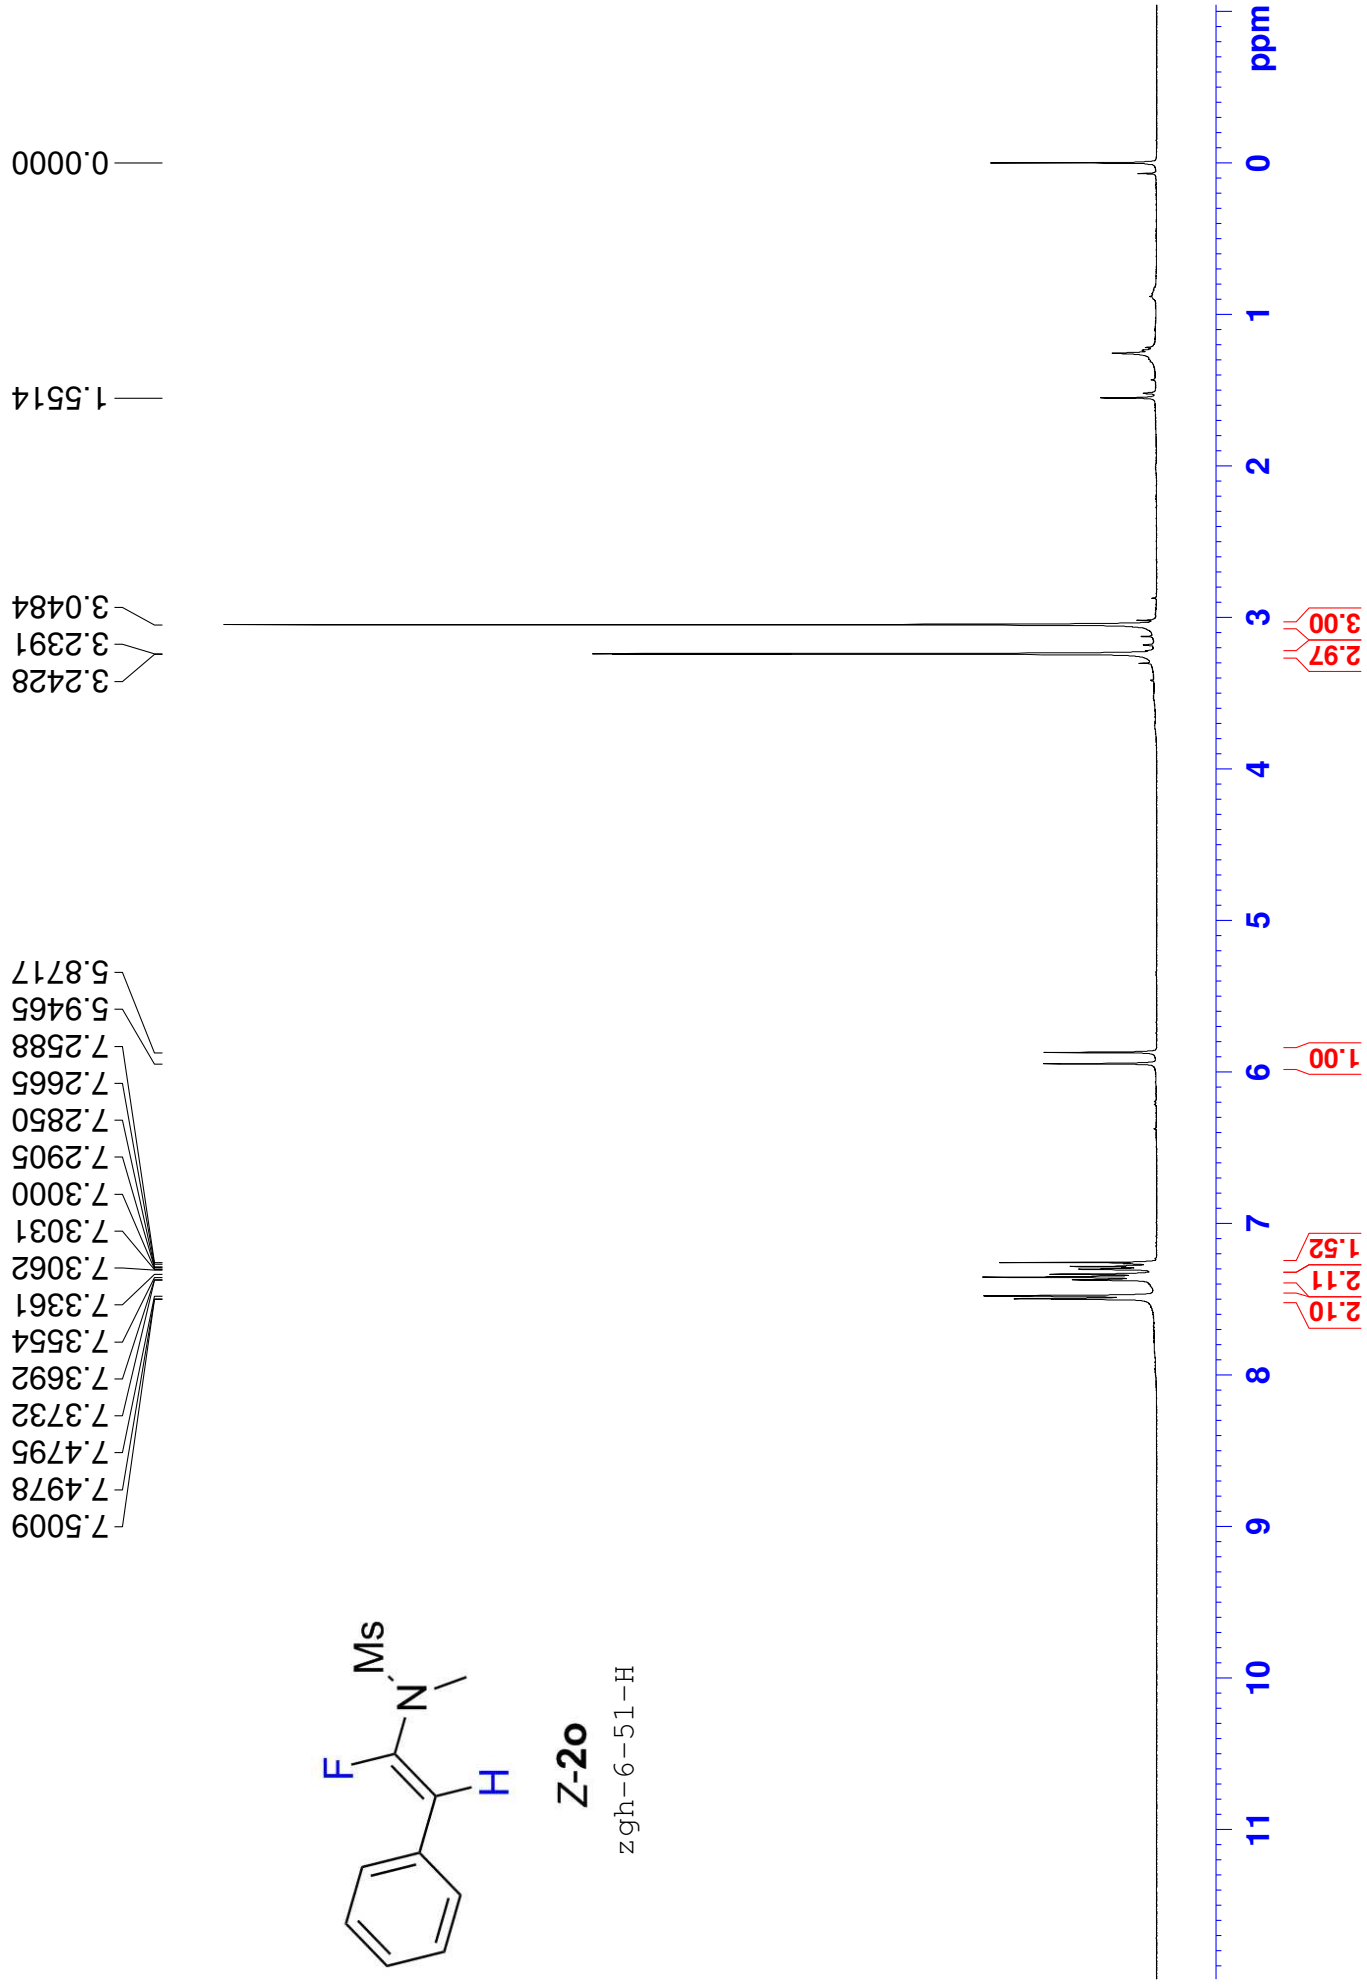

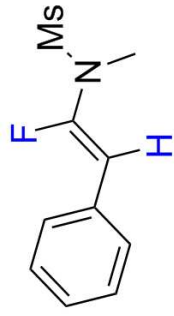

**Z-20**

zgh-6-51-C

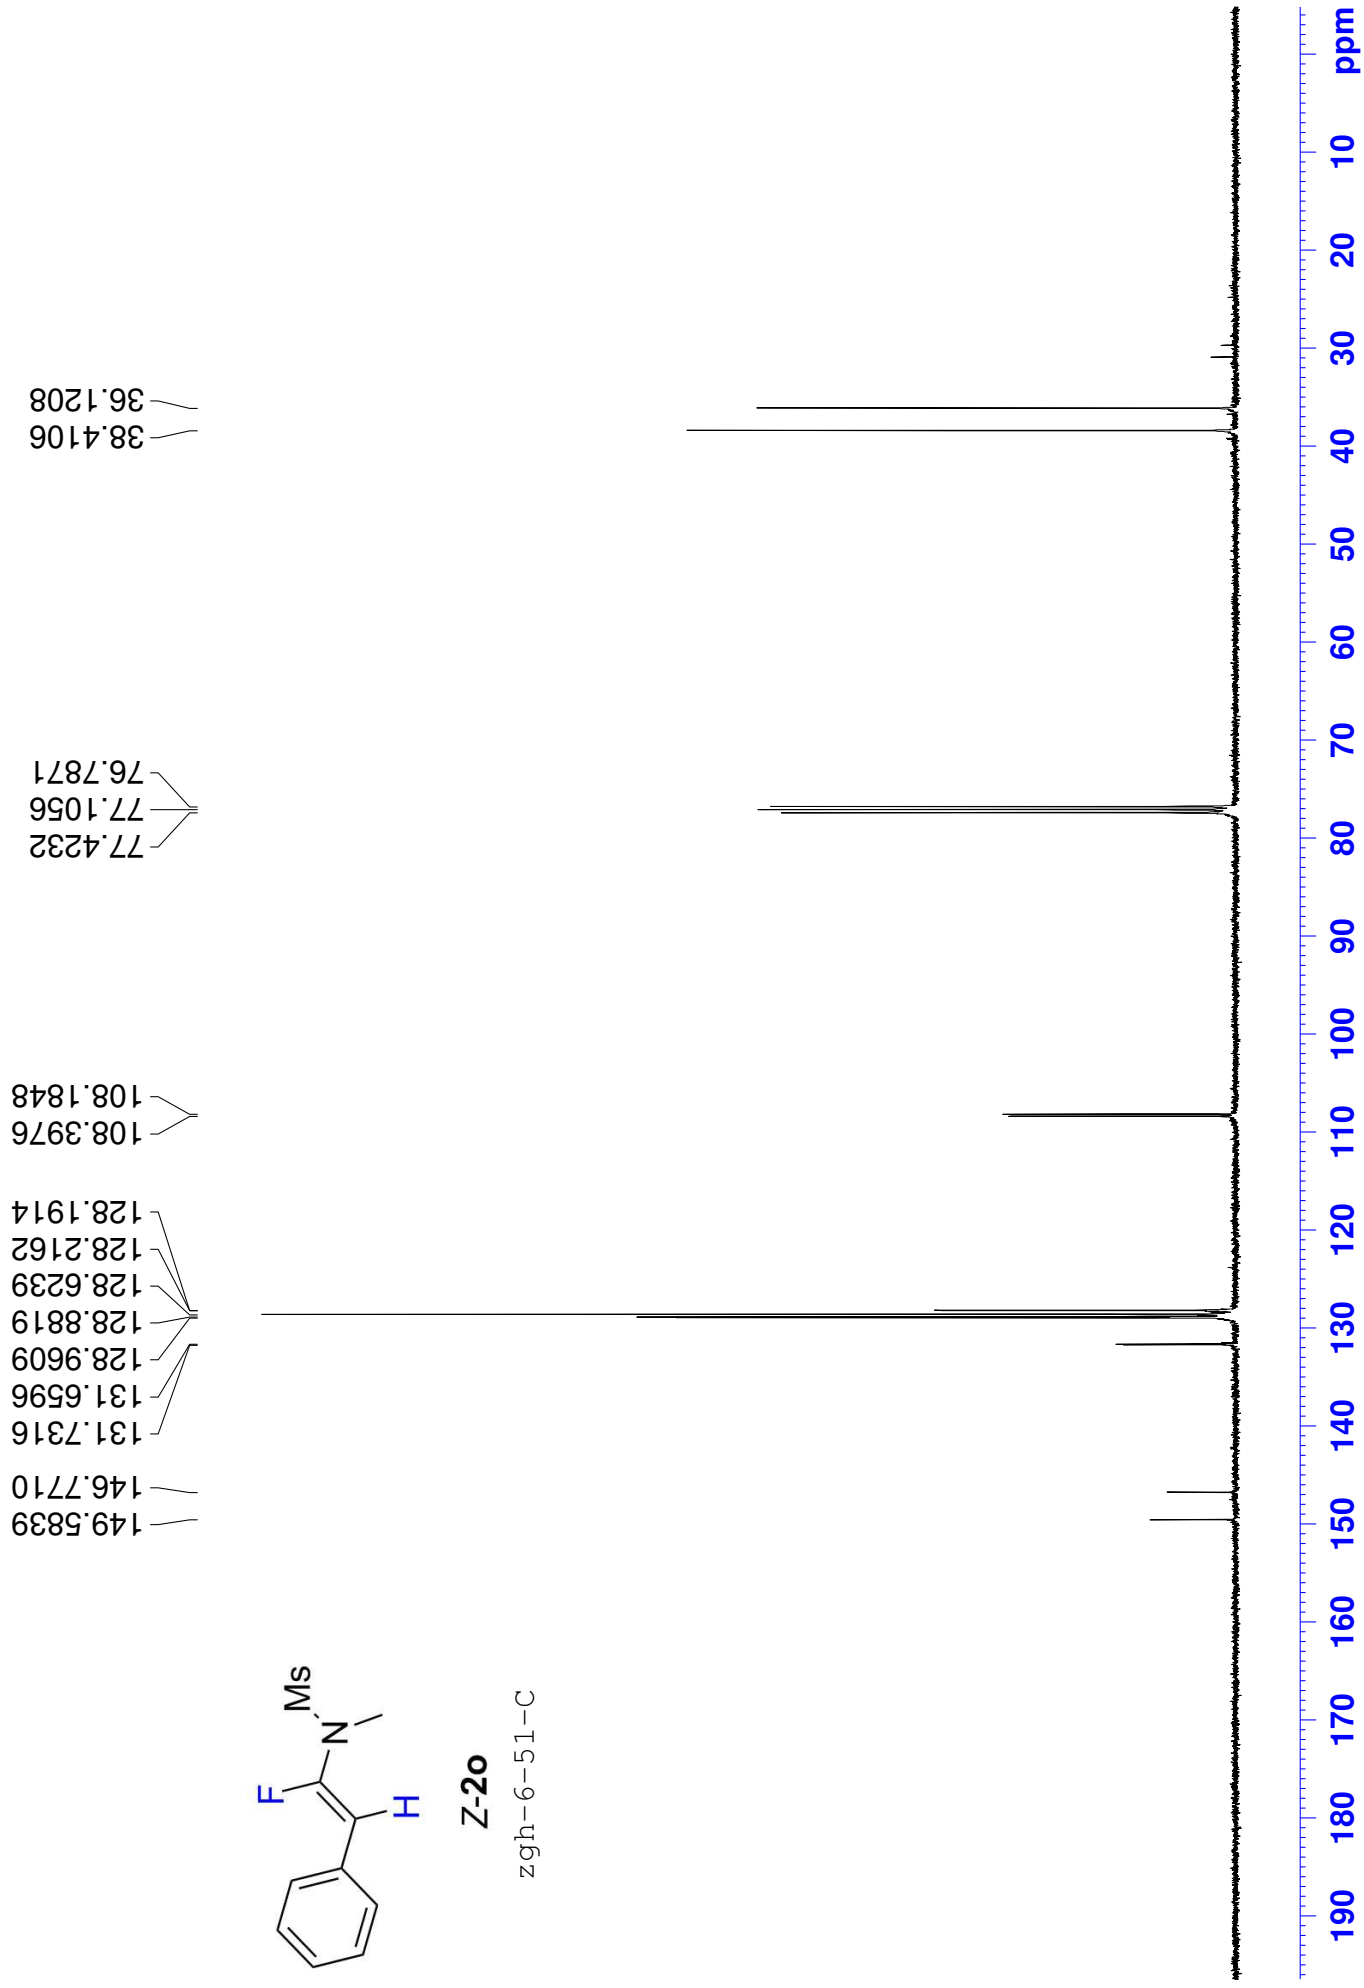



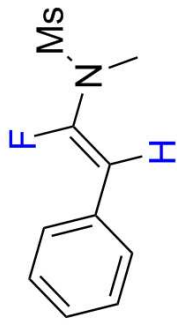

**Z-2o**

zgh-6-51-F

—93.7703

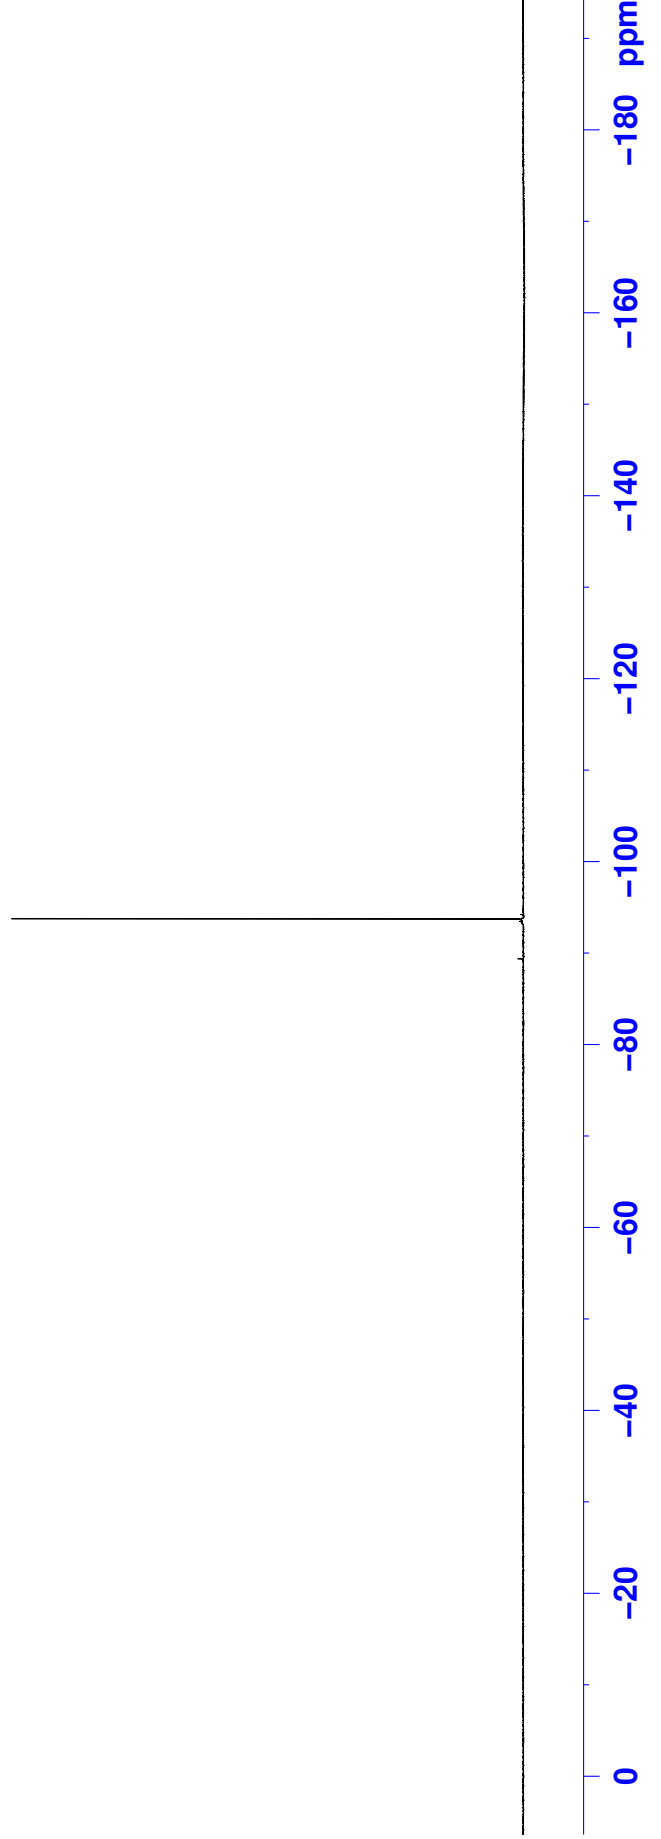

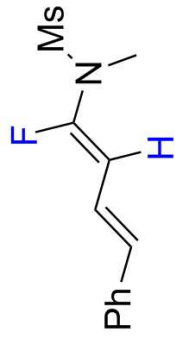

Z-2p

zgh-6-84-H

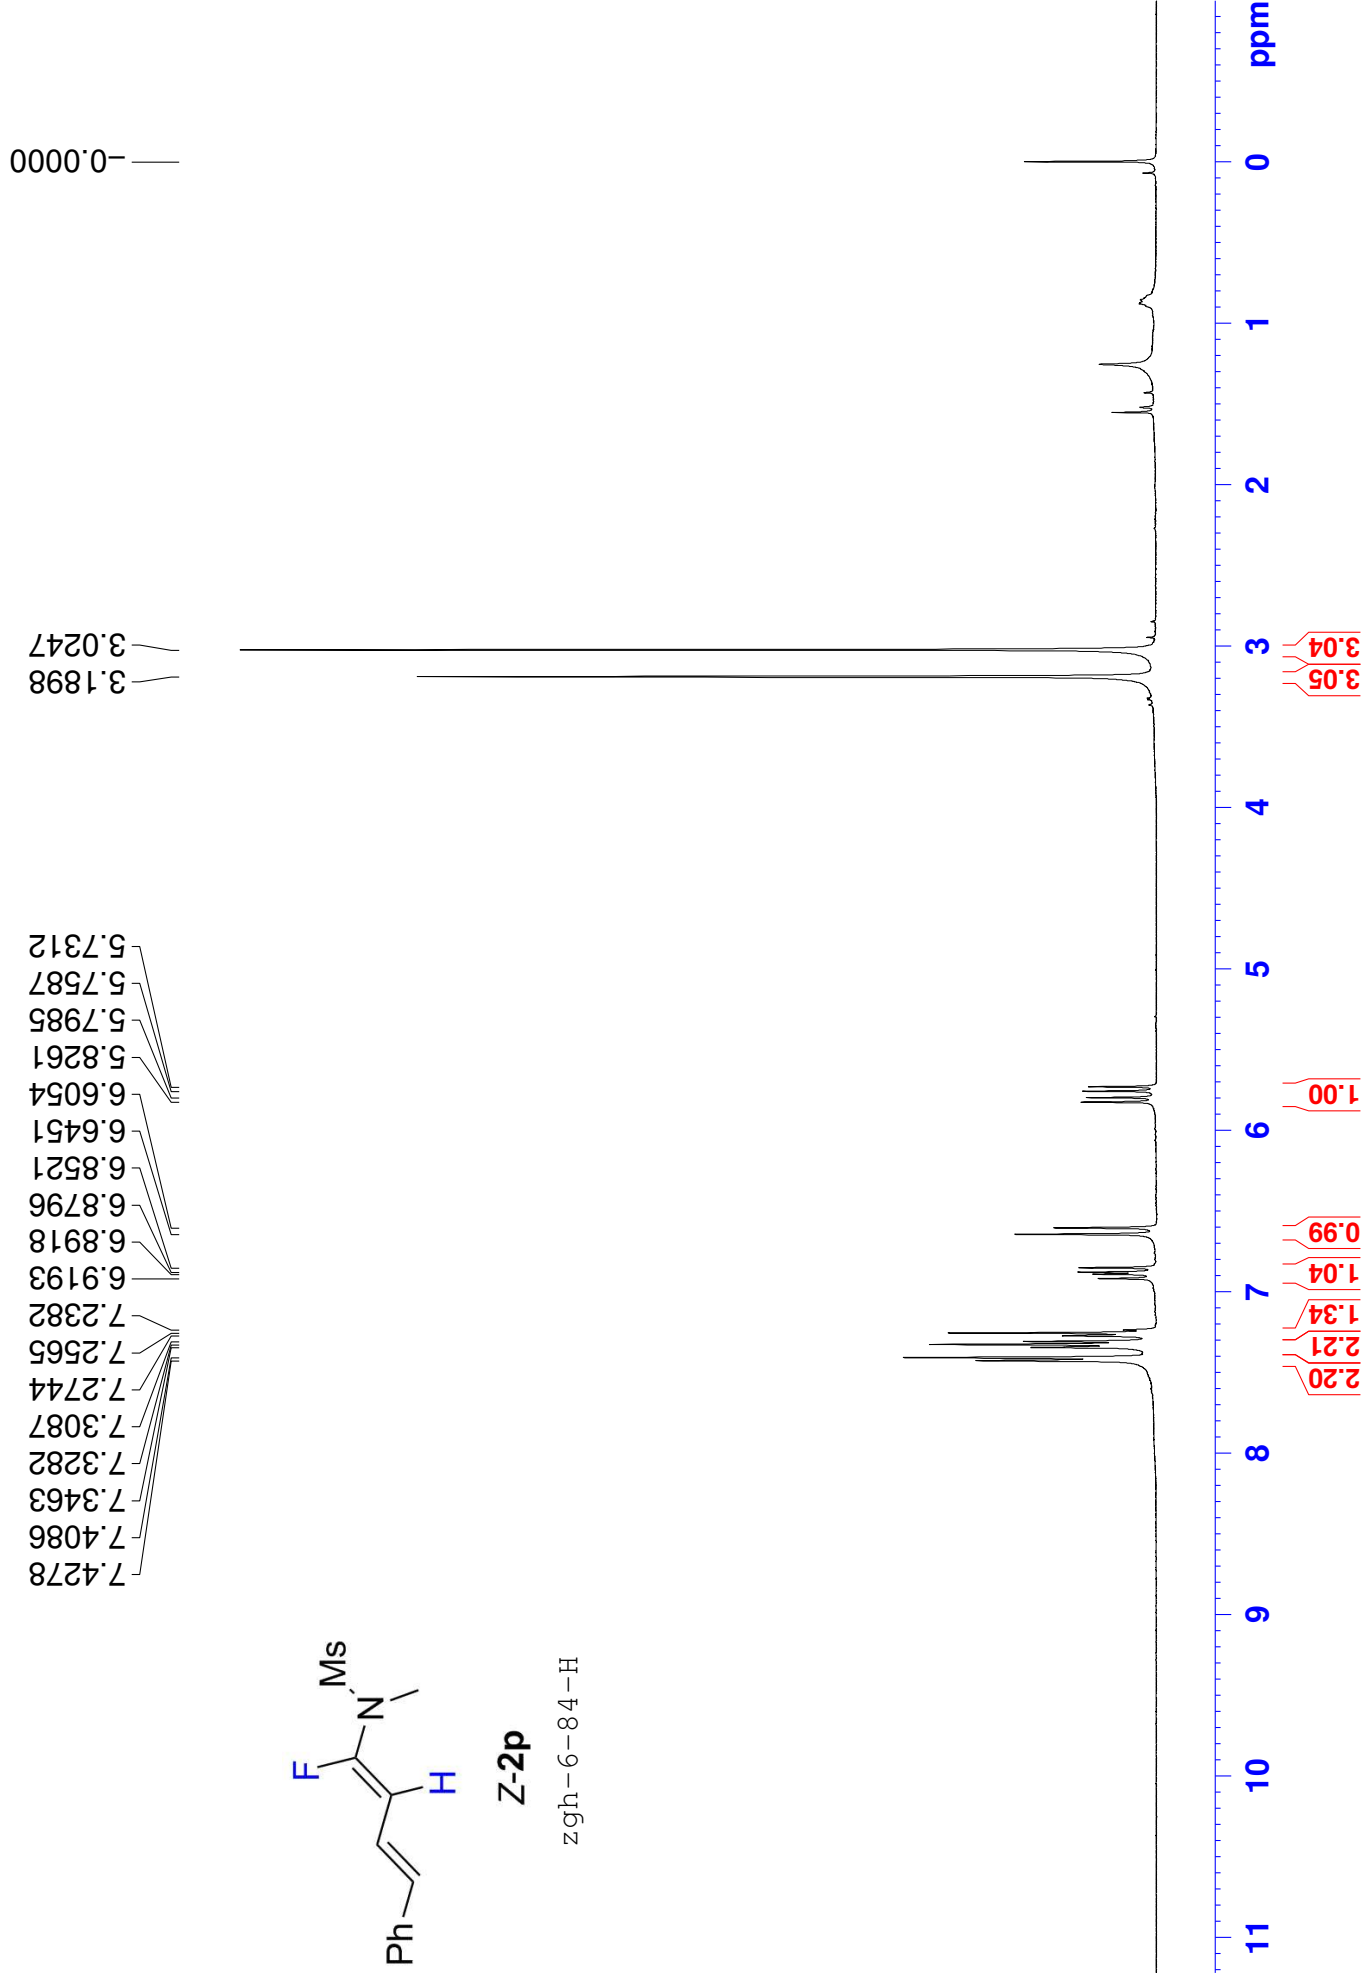

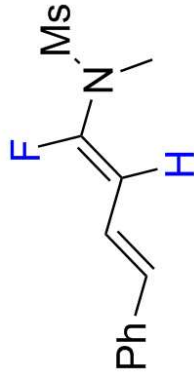

Z-2p

zgh-6-84-C

149.4798  
146.6885  
136.6542  
136.6419  
134.3562  
134.3195  
128.7130  
128.1840  
126.6366  
119.5037  
119.4916  
108.6843  
108.4359  
77.3854  
77.0678  
76.7502  
38.3833  
35.9066

190 180 170 160 150 140 130 120 110 100 90 80 70 60 50 40 30 20 10 ppm

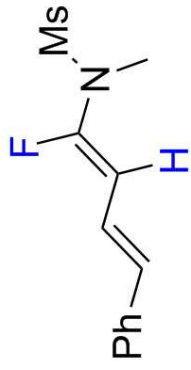

**Z-2p**

zgh-6-84-F

—97.8449

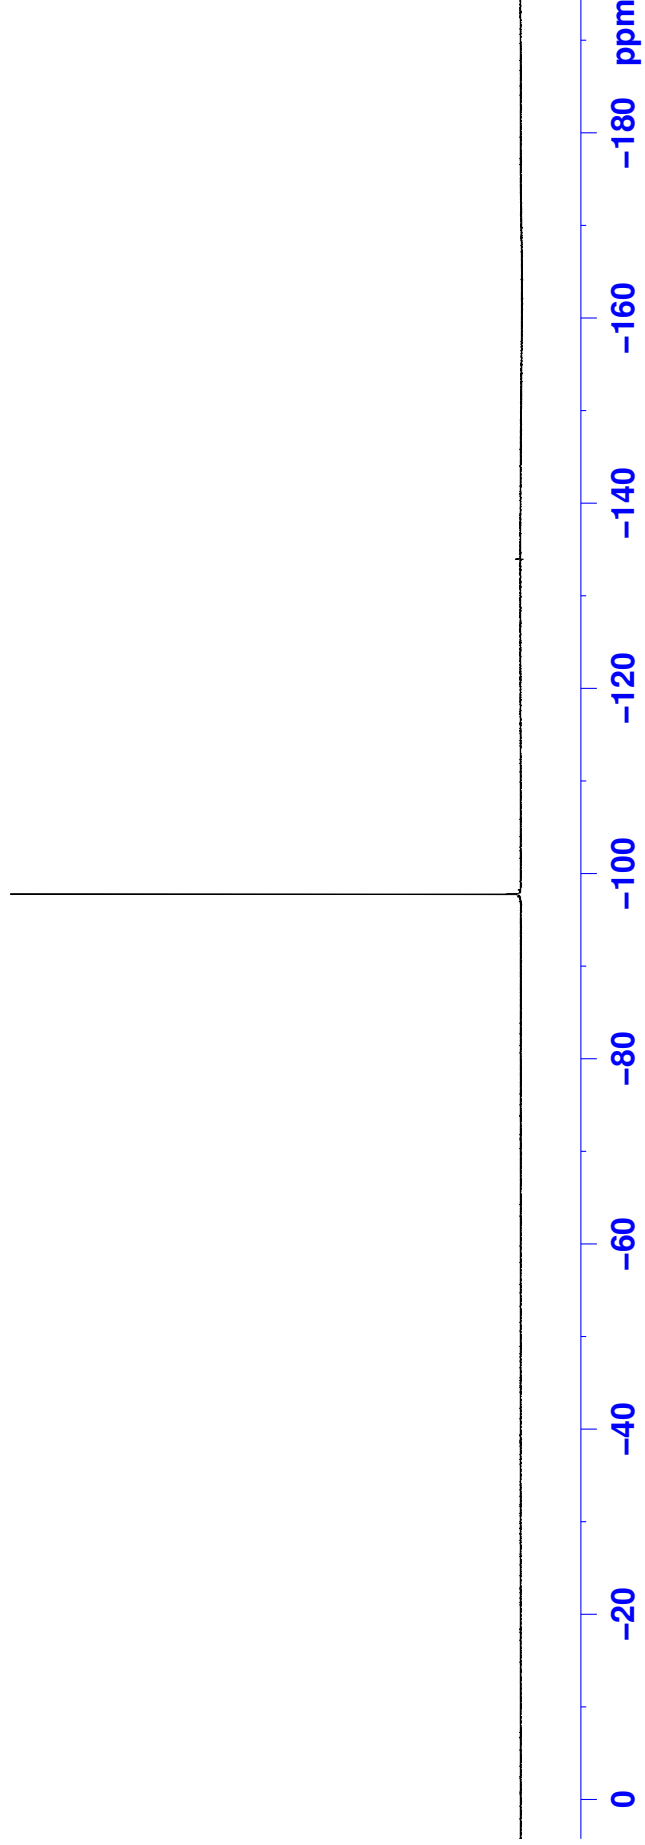

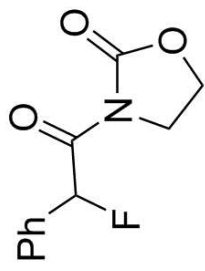

**4a**

zgh-6-68-H

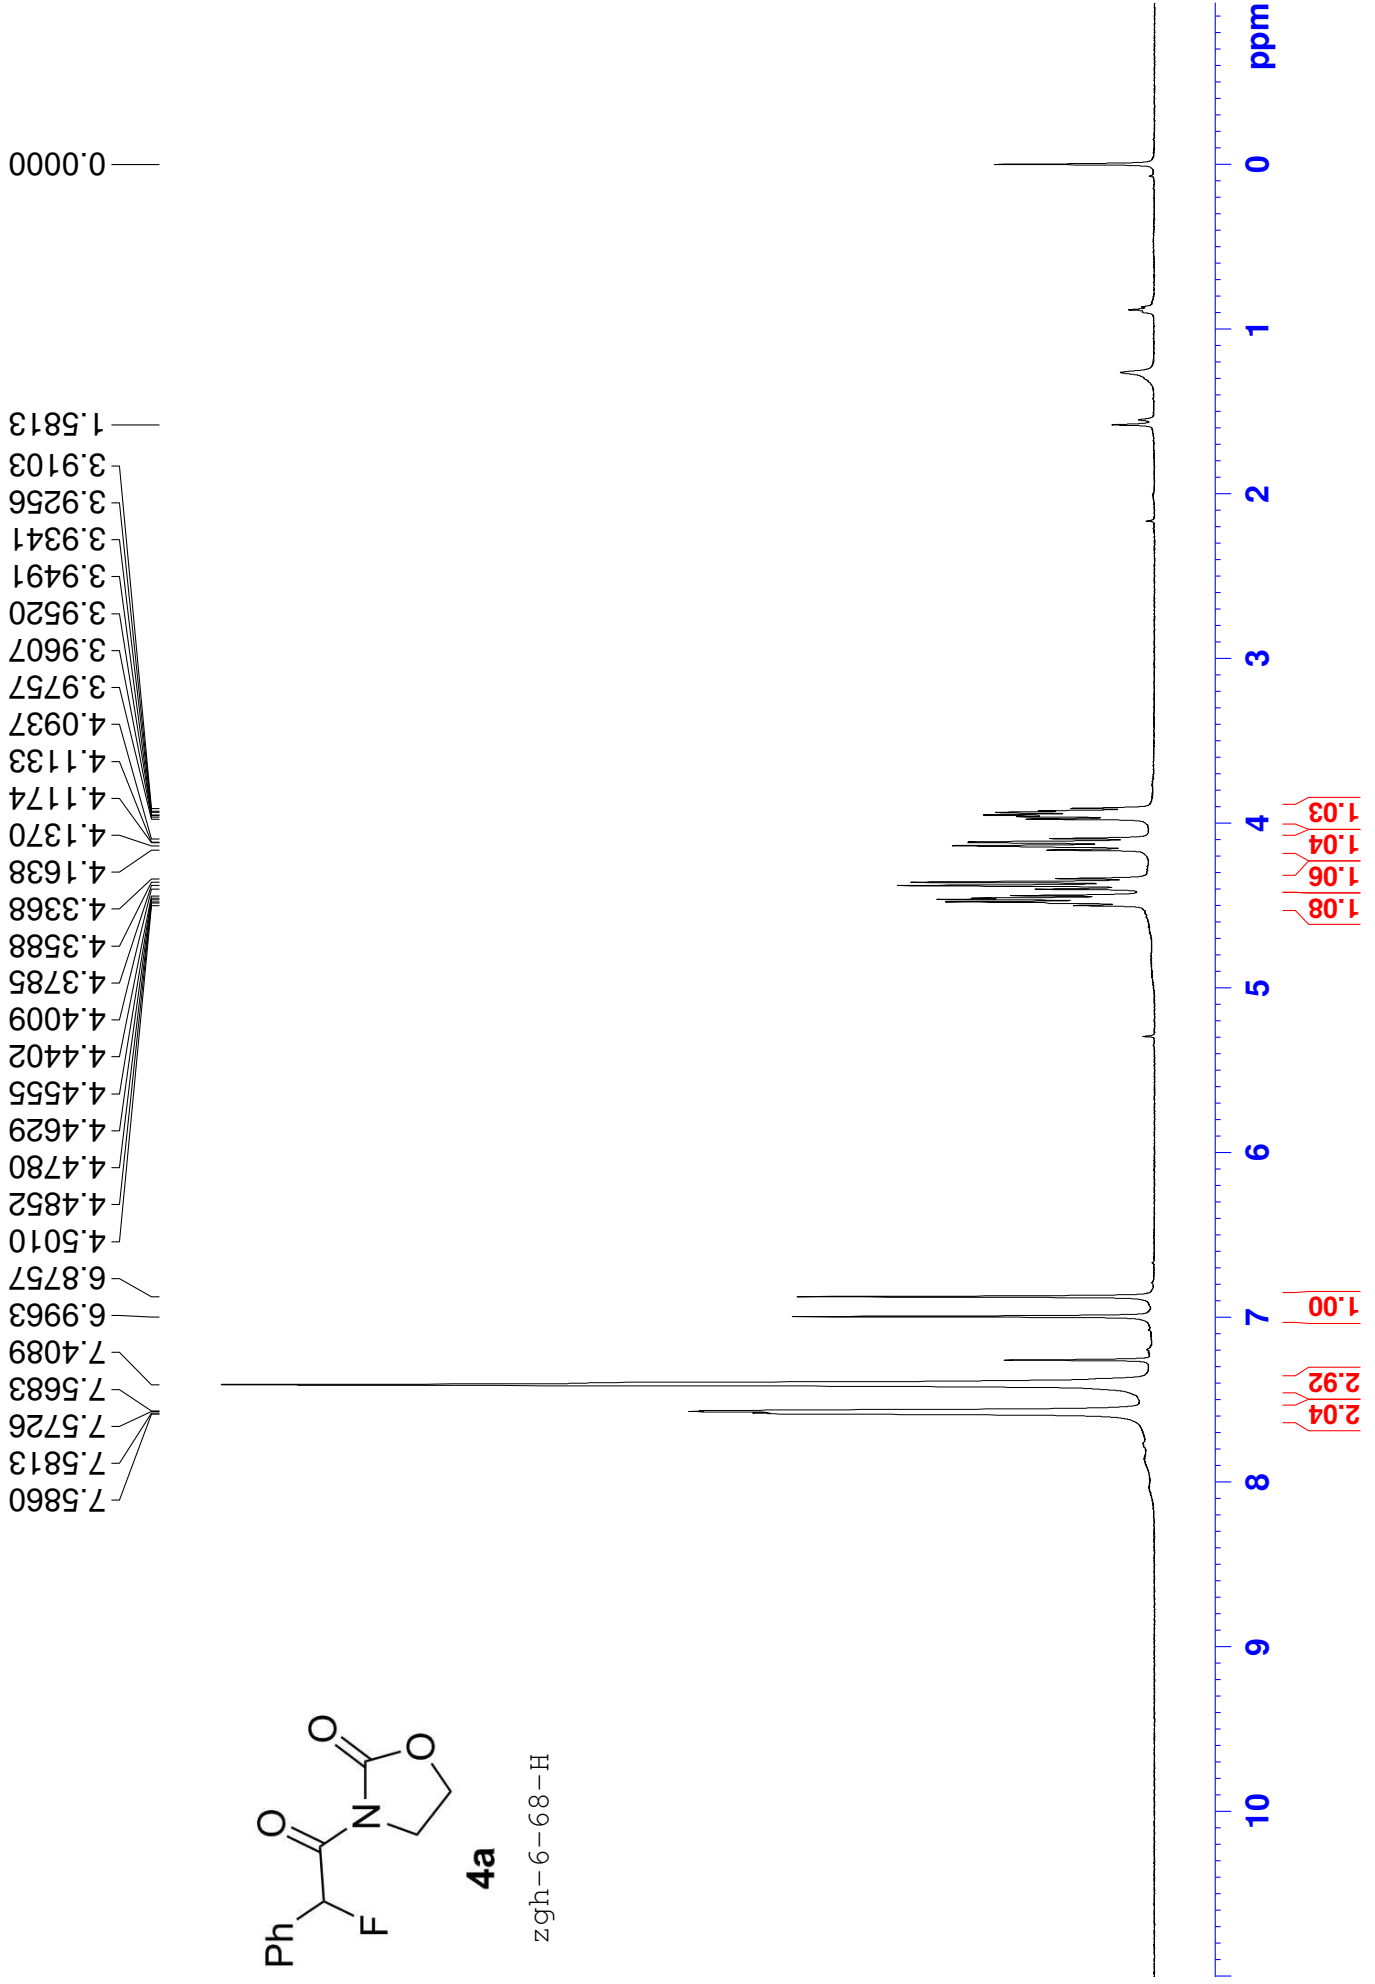

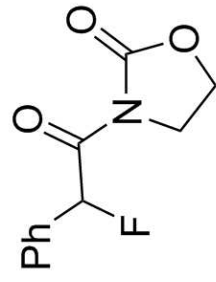

4a

zgh-6-68-C

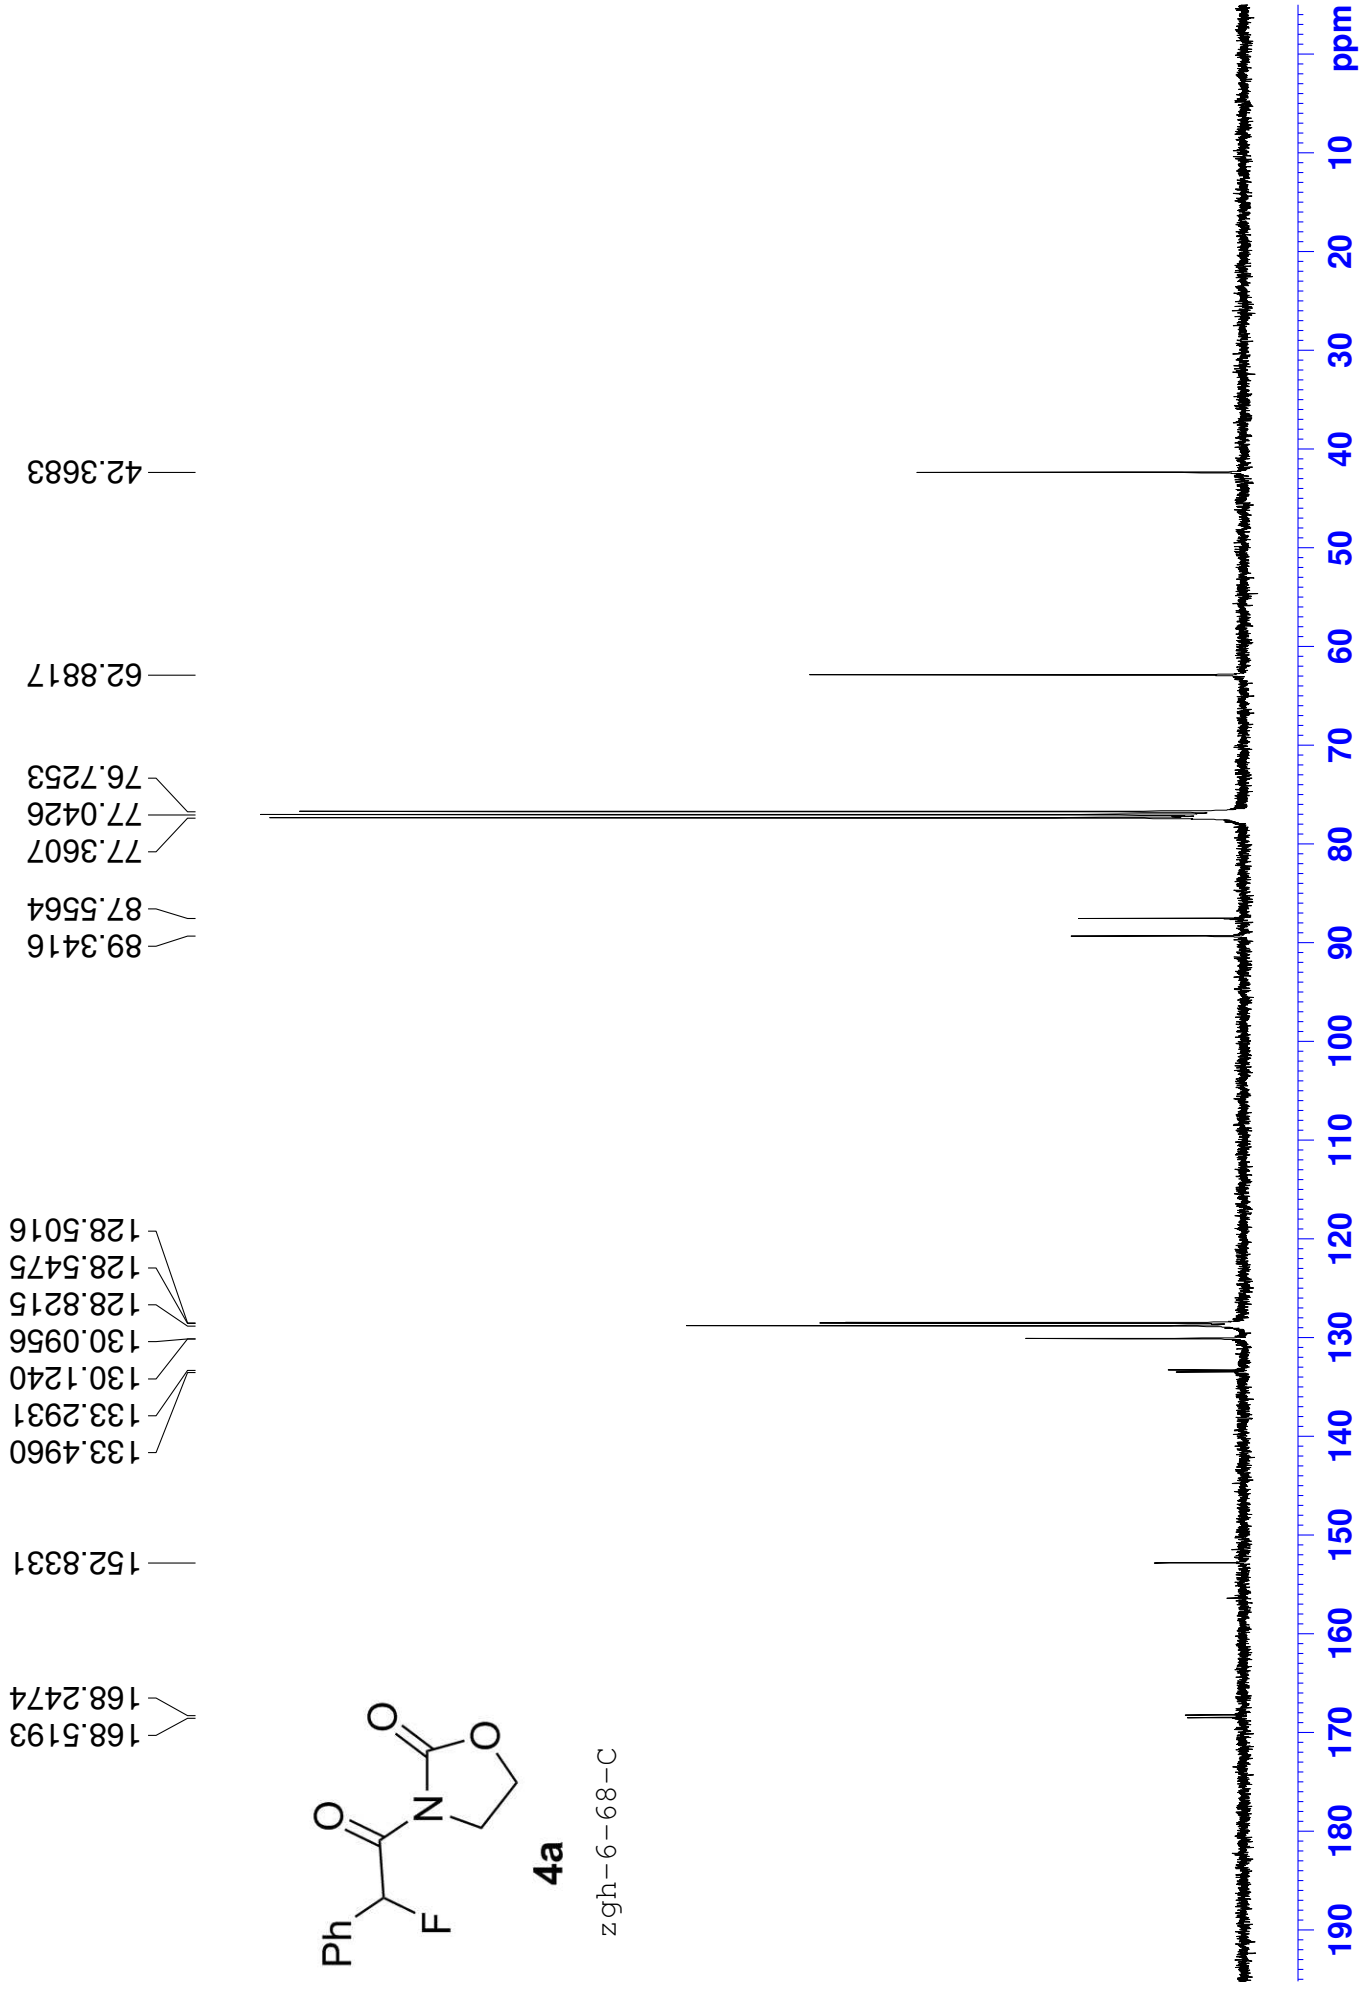

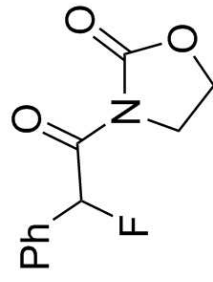

**4a**

zgh-6-68-F

—173.7974

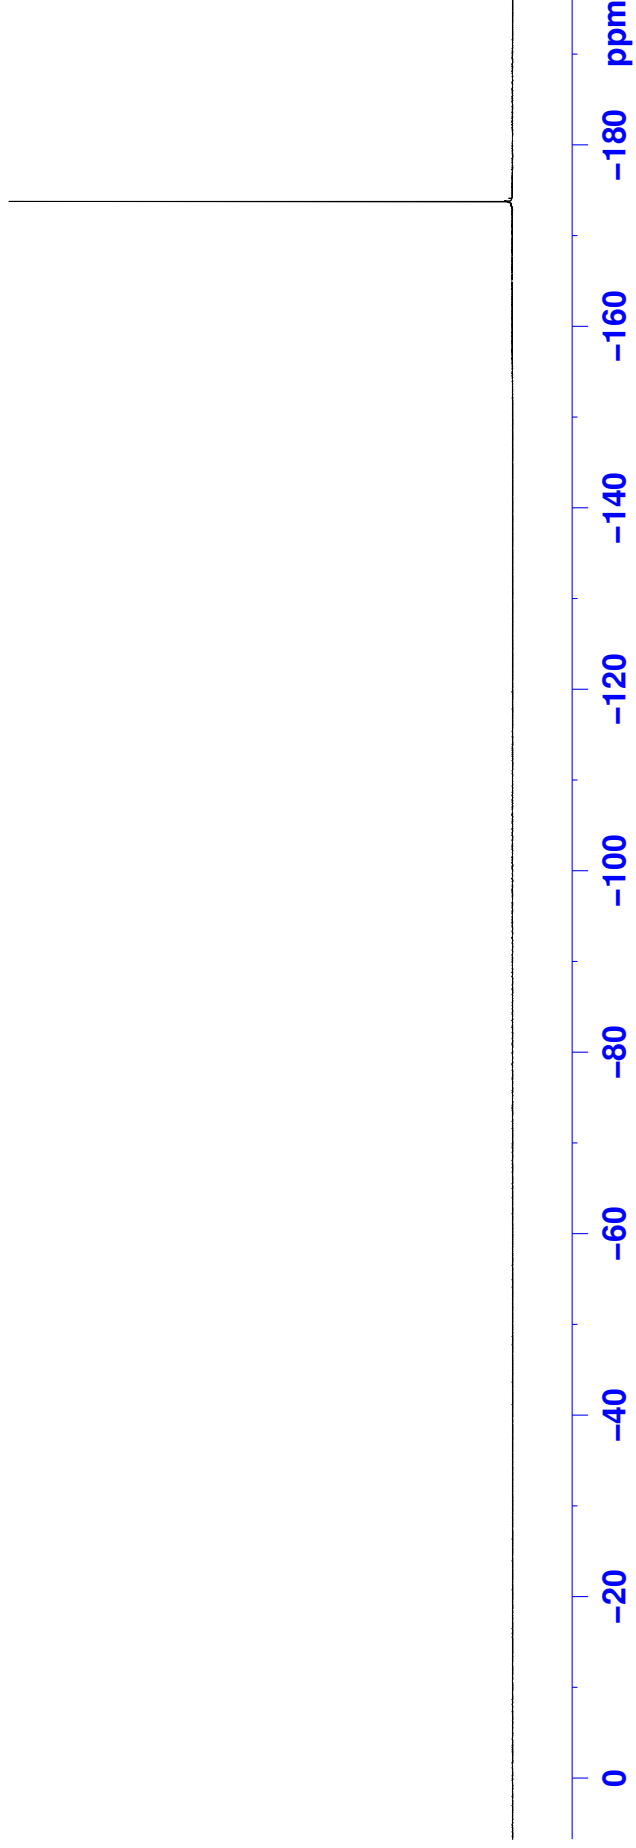

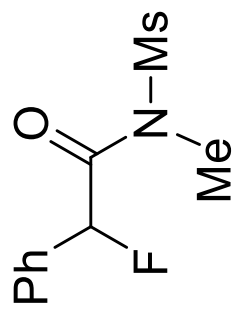

**4o**

zgh-6-83-H

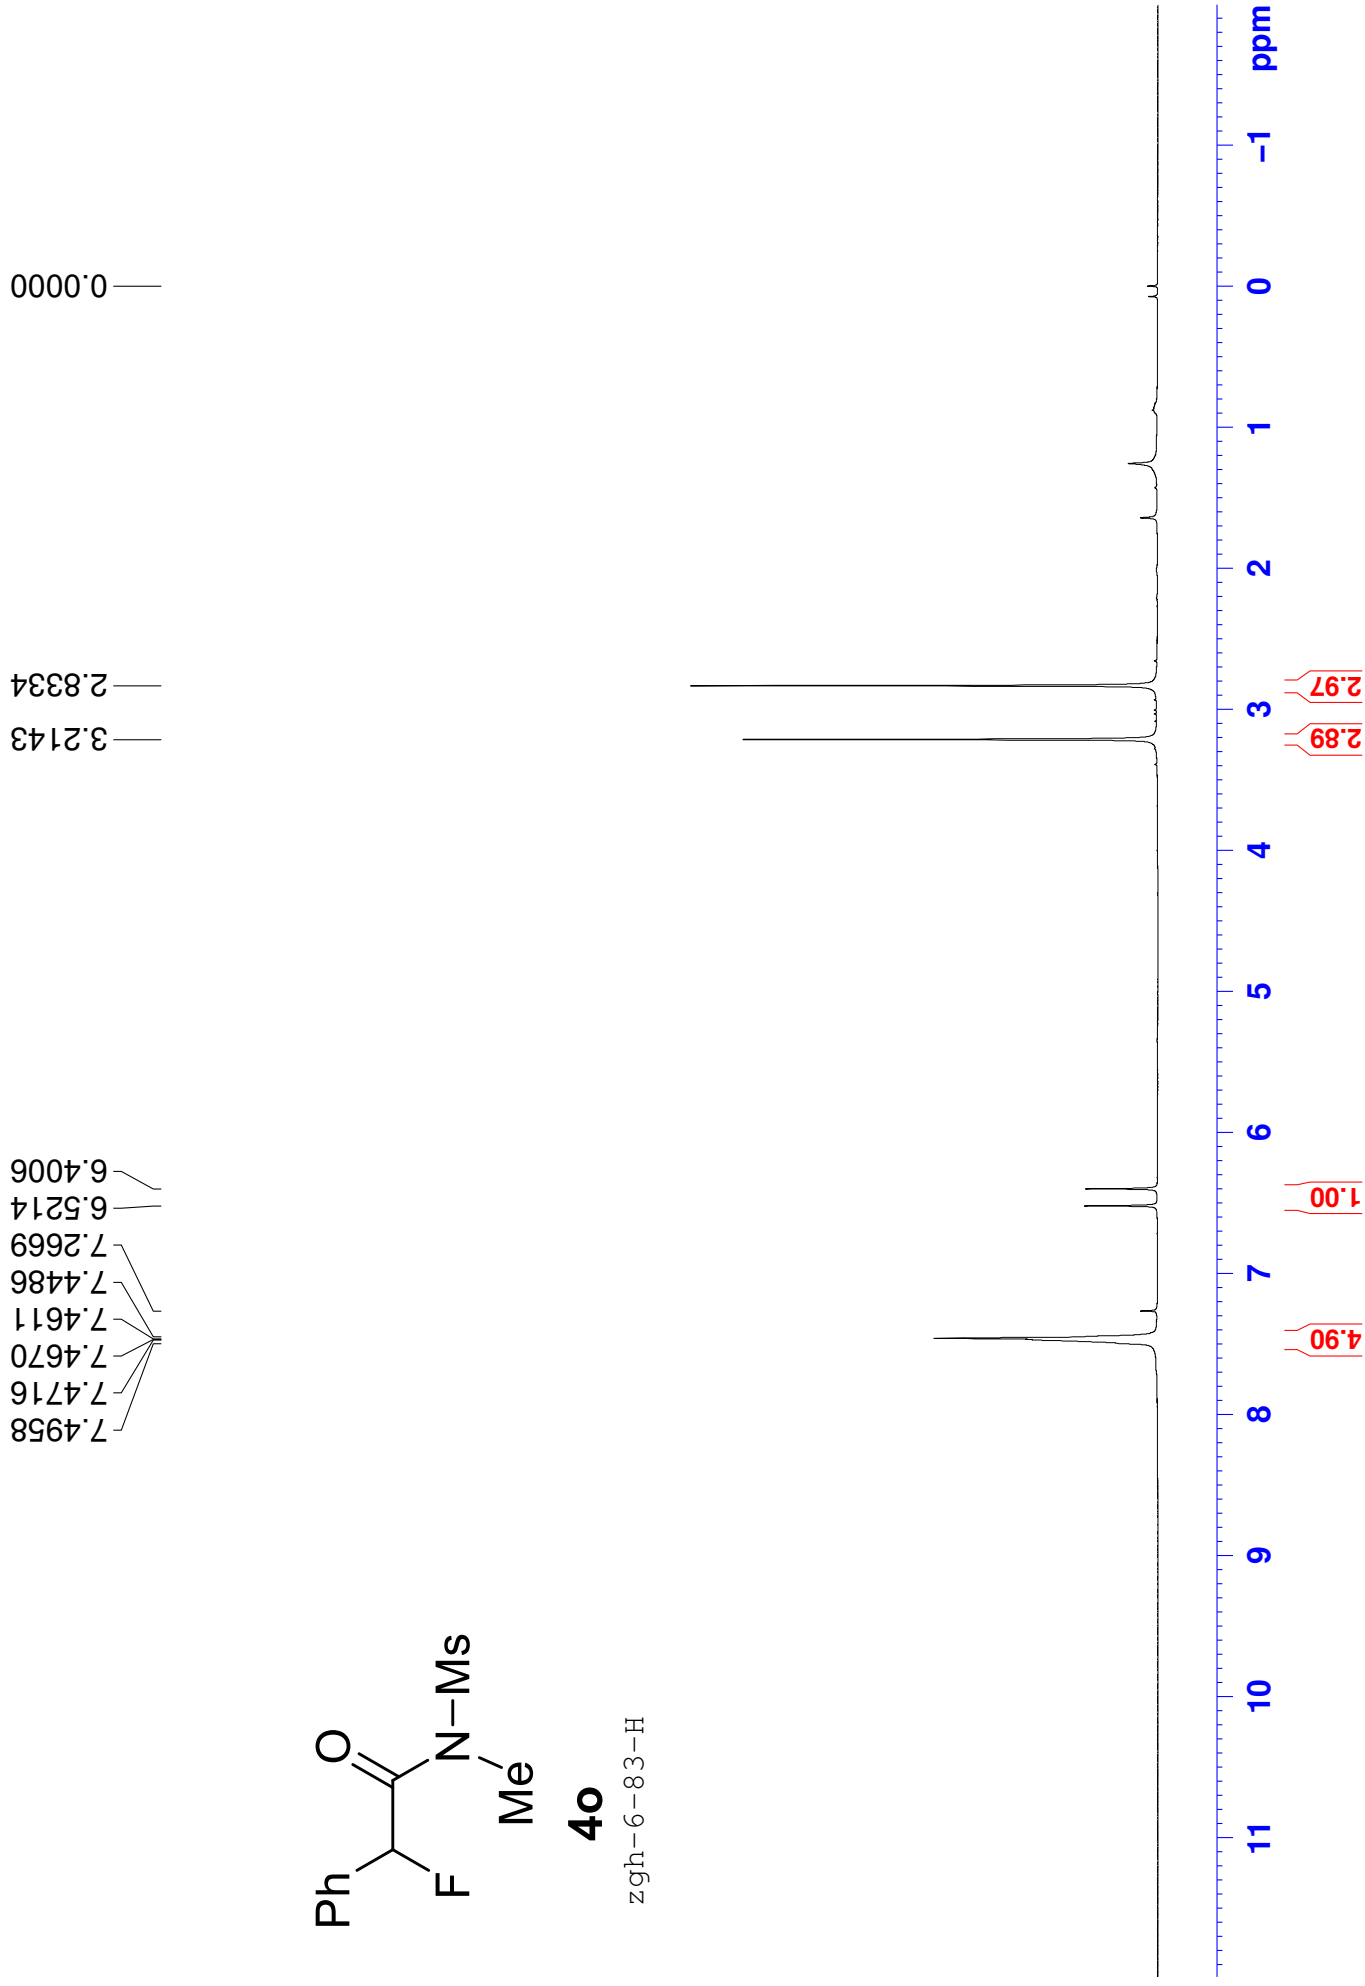



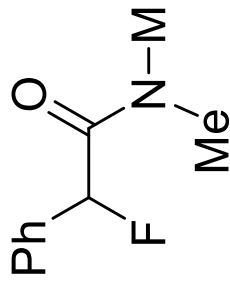

**4o**

zgh-6-83-C

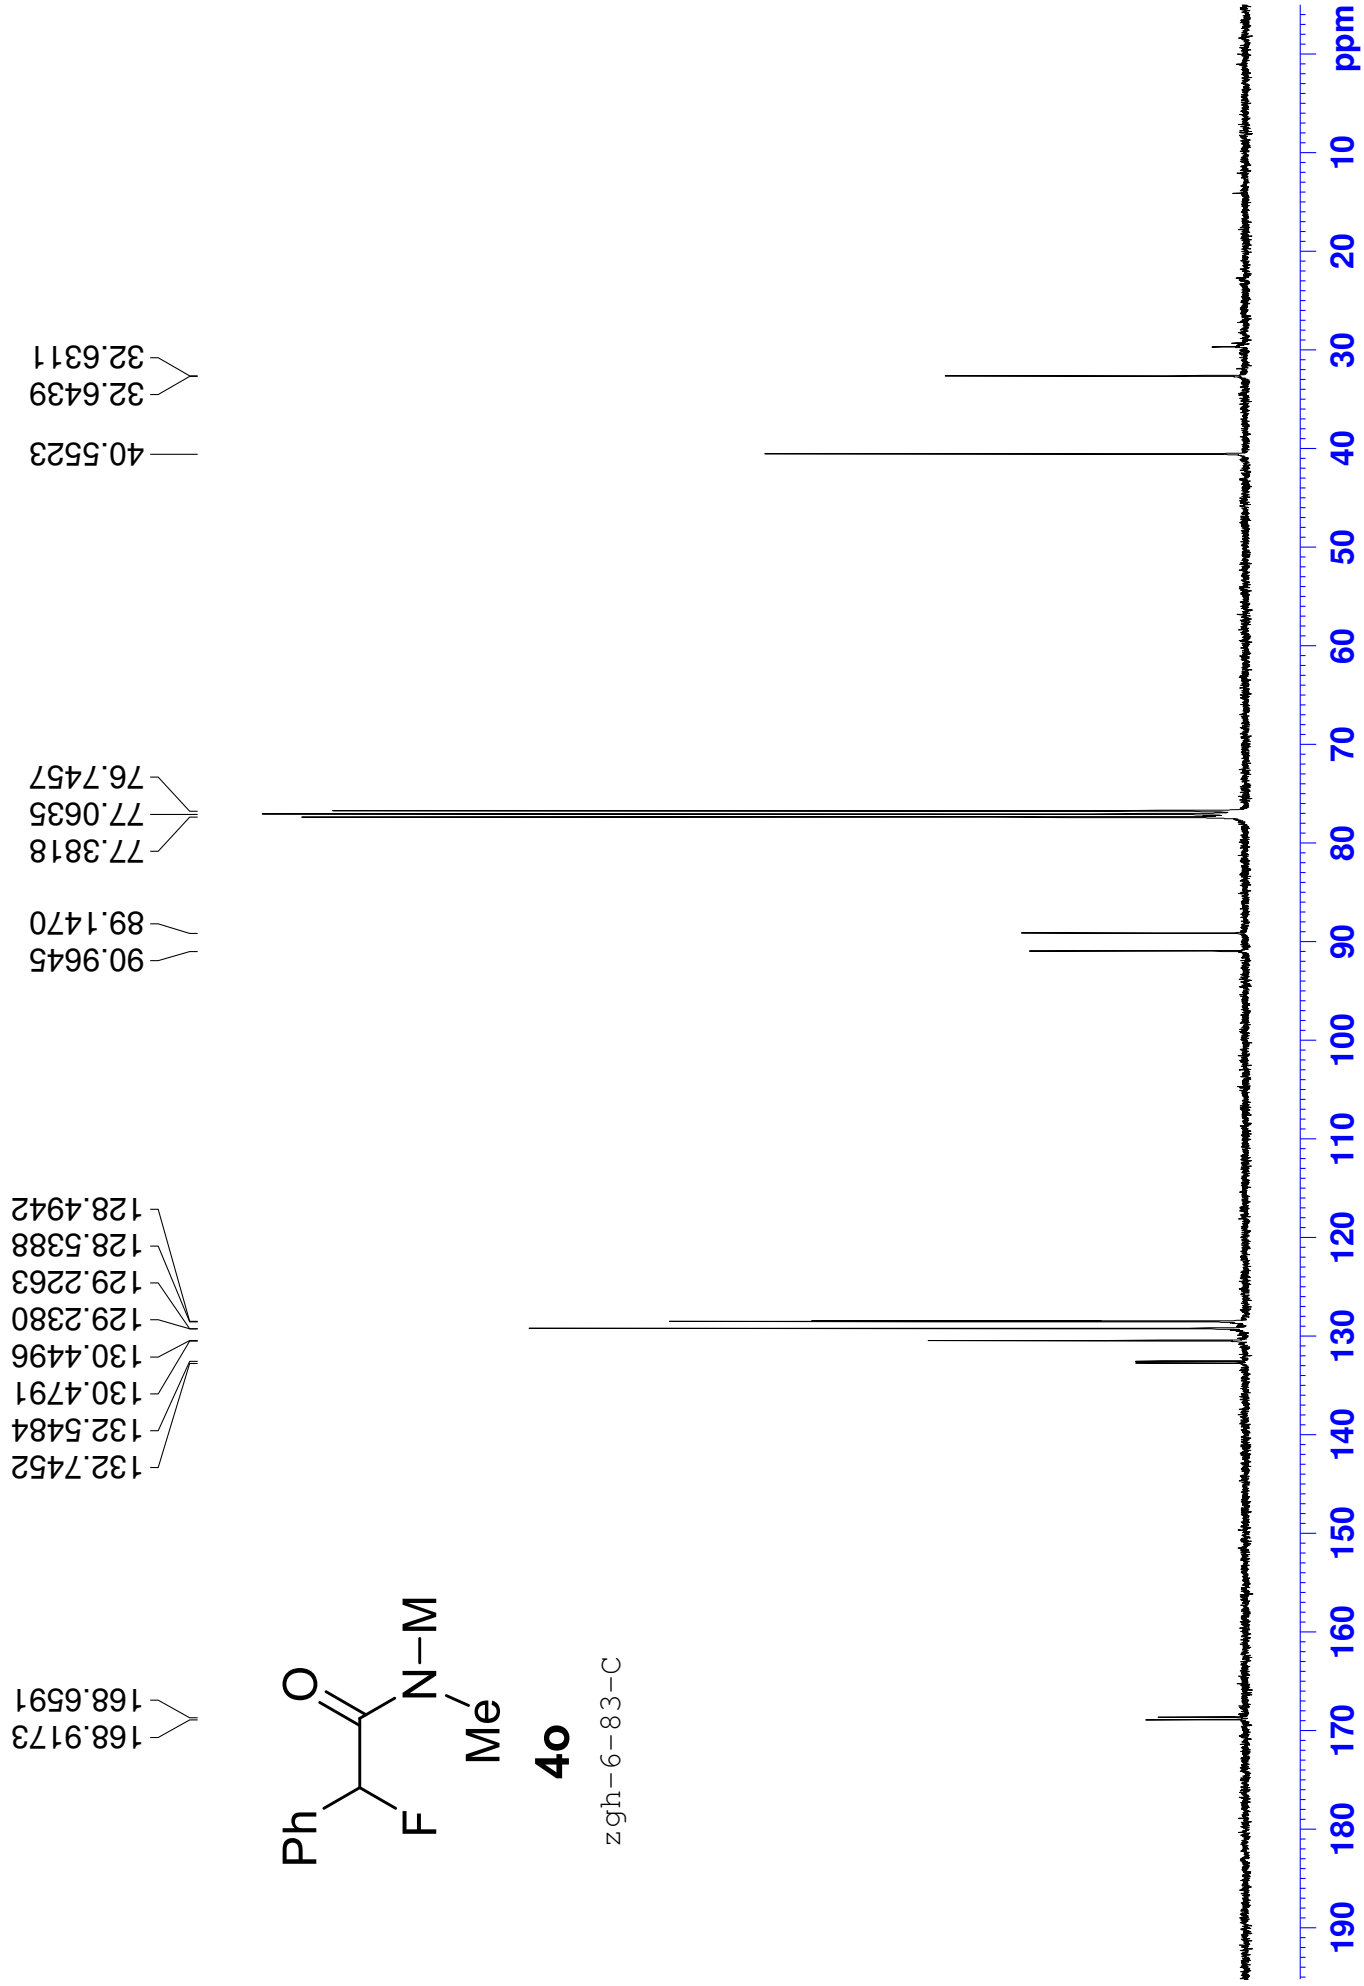

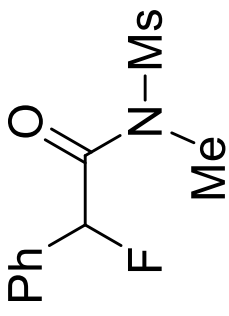

**40**

zgh-6-83-F

— -167.3190

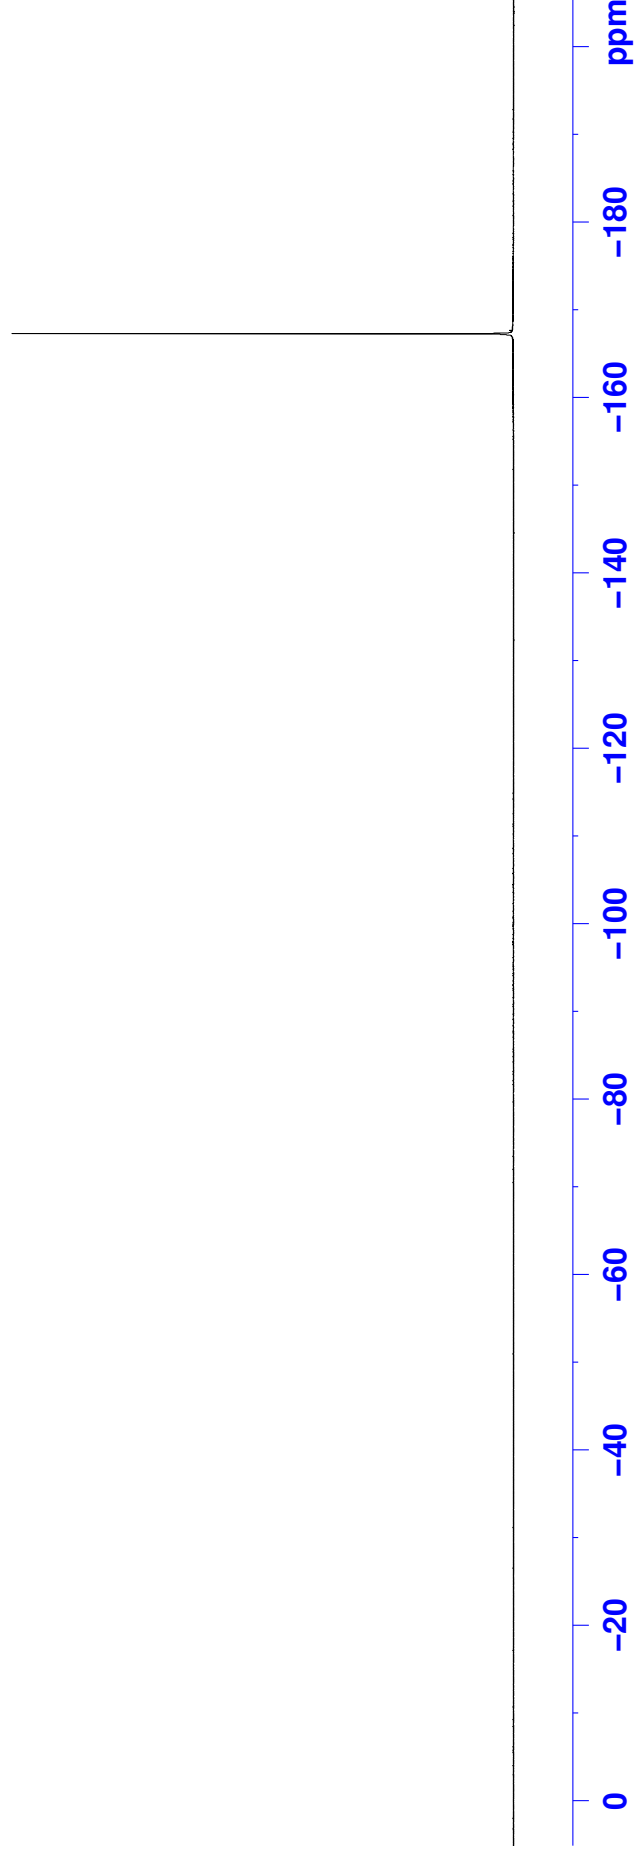

Detailed discussions on the (IPr)CuF-catalyzed reaction mechanism:

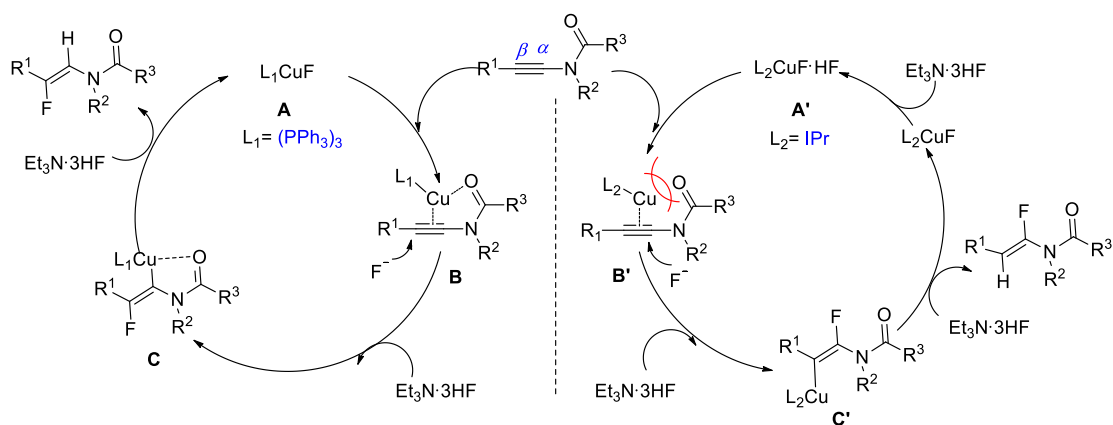

**(PPh<sub>3</sub>)<sub>3</sub> as ligand**    **IPr as ligand**

Shape of phosphine ligand: cone-shaped

NHCs are in general more electron-donating than phosphines

Shape of NHCs ligand: fan-shaped

The regioselectivity of the hydrofluorination was controlled by the ligand<sup>1</sup> of the copper-catalyst. We think that the overall regioselectivity may be controlled in the coordination process (A→B or A'→B'), though we cannot provide any more direct evidence. For the cone-shaped (Ph<sub>3</sub>P)<sub>3</sub> ligand, the chelation of Cu(I) cation to the ynamido carbonyl oxygen contributes to the regioselective attack of fluoride nucleophile at β-carbon of ynamides.<sup>2</sup> In contrast, the larger steric hindrance of IPr ligand suppresses the chelation process, thus fluoride nucleophile tends to attack α-carbon of ynamides.

References:

1. Differences between *N*-heterocyclic carbene and phosphine ligands: (a) R. H. Crabtree, *J. Organomet. Chem.*, 2005, **690**, 5451-5457; (b) H. Clavier and S. P. Nolan, *Chem. Commun.*, 2010, **46**, 841-861; (c) M. N. Hopkinson, C. Richter, M. Schedler and F. Glorius, *Nature*, 2014, **510**, 485-496.
2. For the chelation of the organometal reagent to the carbamoyl moiety of ynamides: (a) Y. Fukudome, H. Naito, T. Hata and H. Urabe, *J. Am. Chem. Soc.*, 2008, **130**, 1820-1821; (b) H. Yasui, H. Yorimitsu and K. Oshima, *Bull. Chem. Soc. Jpn.*,

2008, **81**, 373-379; (c) B. Gourdet and H. W. Lam, *J. Am. Chem. Soc.*, 2009, **131**, 3802-3803; (d) K. A. DeKorver, H. Li, A. G. Lohse, R. Hayashi, Z. Lu, Y. Zhang and R. P. Hsung, *Chem. Rev.*, 2010, **110**, 5064-5106; (e) Y. Minko, M. Pasco, L. Lercher, M. Botoshansky and I. Marek, *Nature*, 2012, **490**, 522-526.
